# Supplementary material
Source: publisher site journal article supplement (https://www.spandidos-publications.com/4649/downloadSupplementary)
Supplement: Supplementary file 1 [file downloadSupplementary]

## Sheet: Sheet1
Table SII. The detailed information of identified circRNAs of all liver tissue samples in mice model.
circRNA ID	Chromosome	circRNA start	circRNA end	No. of junction reads	No. of non-junction reads	Junction reads ratio	Type of circRNA	Gene ID	Gene name	Strand
10:105303594|105323637	10	105303594	105323637	2	2	0.667	exon	ENSMUSG00000036019	Tmtc2	-
10:105303594|105323637	10	105303594	105323637	4	14	0.364	exon	ENSMUSG00000036019	Tmtc2	-
10:105303594|105323637	10	105303594	105323637	5	4	0.714	exon	ENSMUSG00000036019	Tmtc2	-
10:105303594|105323637	10	105303594	105323637	5	9	0.526	exon	ENSMUSG00000036019	Tmtc2	-
10:105321396|105323637	10	105321396	105323637	14	6	0.824	exon	ENSMUSG00000036019	Tmtc2	-
10:105321396|105323637	10	105321396	105323637	2	2	0.667	exon	ENSMUSG00000036019	Tmtc2	-
10:105321396|105323637	10	105321396	105323637	4	13	0.381	exon	ENSMUSG00000036019	Tmtc2	-
10:105321396|105323637	10	105321396	105323637	4	10	0.444	exon	ENSMUSG00000036019	Tmtc2	-
10:105321396|105323637	10	105321396	105323637	5	8	0.556	exon	ENSMUSG00000036019	Tmtc2	-
10:105321396|105323637	10	105321396	105323637	7	6	0.7	exon	ENSMUSG00000036019	Tmtc2	-
10:105321396|105348549	10	105321396	105348549	4	3	0.727	exon	ENSMUSG00000036019	Tmtc2	-
10:105413217|105413787	10	105413217	105413787	11	0	1	exon	ENSMUSG00000036019	Tmtc2	-
10:105413217|105413787	10	105413217	105413787	12	0	1	exon	ENSMUSG00000036019	Tmtc2	-
10:105413217|105413787	10	105413217	105413787	23	4	0.92	exon	ENSMUSG00000036019	Tmtc2	-
10:105413217|105413787	10	105413217	105413787	29	1	0.983	exon	ENSMUSG00000036019	Tmtc2	-
10:105413217|105413787	10	105413217	105413787	4	0	1	exon	ENSMUSG00000036019	Tmtc2	-
10:105413217|105413787	10	105413217	105413787	6	3	0.8	exon	ENSMUSG00000036019	Tmtc2	-
10:105413217|105413787	10	105413217	105413787	8	4	0.8	exon	ENSMUSG00000036019	Tmtc2	-
10:105823160|105826591	10	105823160	105826591	6	3	0.8	exon	ENSMUSG00000036009	Mettl25	-
10:105823160|105826591	10	105823160	105826591	8	3	0.842	exon	ENSMUSG00000036009	Mettl25	-
10:106962962|106988909	10	106962962	106988909	4	13	0.381	exon	ENSMUSG00000035948	Acss3	-
10:107023654|107053516	10	107023654	107053516	16	8	0.8	exon	ENSMUSG00000035948	Acss3	-
10:107023654|107053516	10	107023654	107053516	4	9	0.471	exon	ENSMUSG00000035948	Acss3	-
10:107023654|107053516	10	107023654	107053516	8	16	0.5	exon	ENSMUSG00000035948	Acss3	-
10:107023654|107084951	10	107023654	107084951	3	7	0.462	exon	ENSMUSG00000035948	Acss3	-
10:107045213|107053483	10	107045213	107053483	3	15	0.286	exon	ENSMUSG00000035948	Acss3	-
10:107045213|107053516	10	107045213	107053516	11	6	0.786	exon	ENSMUSG00000035948	Acss3	-
10:107045213|107053516	10	107045213	107053516	13	8	0.765	exon	ENSMUSG00000035948	Acss3	-
10:107045213|107053516	10	107045213	107053516	13	11	0.703	exon	ENSMUSG00000035948	Acss3	-
10:107045213|107053516	10	107045213	107053516	14	12	0.7	exon	ENSMUSG00000035948	Acss3	-
10:107045213|107053516	10	107045213	107053516	14	11	0.718	exon	ENSMUSG00000035948	Acss3	-
10:107045213|107053516	10	107045213	107053516	14	15	0.651	exon	ENSMUSG00000035948	Acss3	-
10:107045213|107053516	10	107045213	107053516	15	17	0.638	exon	ENSMUSG00000035948	Acss3	-
10:107045213|107053516	10	107045213	107053516	26	6	0.897	exon	ENSMUSG00000035948	Acss3	-
10:107045213|107053516	10	107045213	107053516	5	19	0.345	exon	ENSMUSG00000035948	Acss3	-
10:107045213|107053516	10	107045213	107053516	7	19	0.424	exon	ENSMUSG00000035948	Acss3	-
10:107045213|107053516	10	107045213	107053516	8	6	0.727	exon	ENSMUSG00000035948	Acss3	-
10:107045213|107053516	10	107045213	107053516	8	9	0.64	exon	ENSMUSG00000035948	Acss3	-
10:107045213|107084951	10	107045213	107084951	11	10	0.688	exon	ENSMUSG00000035948	Acss3	-
10:107045213|107084951	10	107045213	107084951	4	2	0.8	exon	ENSMUSG00000035948	Acss3	-
10:107045213|107084951	10	107045213	107084951	6	5	0.706	exon	ENSMUSG00000035948	Acss3	-
10:107045213|107084951	10	107045213	107084951	9	5	0.783	exon	ENSMUSG00000035948	Acss3	-
10:107045213|107084951	10	107045213	107084951	9	6	0.75	exon	ENSMUSG00000035948	Acss3	-
10:107380080|107382713	10	107380080	107382713	4	6	0.571	exon	ENSMUSG00000019906	Lin7a	+
10:108198833|108214506	10	108198833	108214506	3	15	0.286	exon	ENSMUSG00000019907	Ppp1r12a	+
10:108198833|108214506	10	108198833	108214506	3	17	0.261	exon	ENSMUSG00000019907	Ppp1r12a	+
10:108198833|108214506	10	108198833	108214506	5	18	0.357	exon	ENSMUSG00000019907	Ppp1r12a	+
10:108198833|108234143	10	108198833	108234143	6	11	0.522	exon	ENSMUSG00000019907	Ppp1r12a	+
10:108230437|108234143	10	108230437	108234143	4	34	0.19	exon	ENSMUSG00000019907	Ppp1r12a	+
10:108230437|108240179	10	108230437	108240179	5	62	0.139	exon	ENSMUSG00000019907	Ppp1r12a	+
10:108240105|108241278	10	108240105	108241278	3	43	0.122	exon	ENSMUSG00000019907	Ppp1r12a	+
10:108240105|108241278	10	108240105	108241278	5	29	0.256	exon	ENSMUSG00000019907	Ppp1r12a	+
10:108240105|108241278	10	108240105	108241278	5	32	0.238	exon	ENSMUSG00000019907	Ppp1r12a	+
10:108240105|108243130	10	108240105	108243130	14	24	0.538	exon	ENSMUSG00000019907	Ppp1r12a	+
10:108240105|108243130	10	108240105	108243130	14	36	0.438	exon	ENSMUSG00000019907	Ppp1r12a	+
10:108240105|108243130	10	108240105	108243130	14	25	0.528	exon	ENSMUSG00000019907	Ppp1r12a	+
10:108240105|108243130	10	108240105	108243130	17	27	0.557	exon	ENSMUSG00000019907	Ppp1r12a	+
10:108240105|108243130	10	108240105	108243130	17	15	0.694	exon	ENSMUSG00000019907	Ppp1r12a	+
10:108240105|108243130	10	108240105	108243130	26	19	0.732	exon	ENSMUSG00000019907	Ppp1r12a	+
10:108240105|108243130	10	108240105	108243130	32	59	0.52	exon	ENSMUSG00000019907	Ppp1r12a	+
10:108240105|108243130	10	108240105	108243130	4	18	0.308	exon	ENSMUSG00000019907	Ppp1r12a	+
10:108240105|108243130	10	108240105	108243130	6	16	0.429	exon	ENSMUSG00000019907	Ppp1r12a	+
10:108240105|108243130	10	108240105	108243130	9	24	0.429	exon	ENSMUSG00000019907	Ppp1r12a	+
10:108240105|108243130	10	108240105	108243130	9	19	0.486	exon	ENSMUSG00000019907	Ppp1r12a	+
10:108240105|108251008	10	108240105	108251008	10	28	0.417	exon	ENSMUSG00000019907	Ppp1r12a	+
10:108240105|108251008	10	108240105	108251008	14	29	0.491	exon	ENSMUSG00000019907	Ppp1r12a	+
10:108240105|108251008	10	108240105	108251008	14	34	0.452	exon	ENSMUSG00000019907	Ppp1r12a	+
10:108240105|108251008	10	108240105	108251008	15	25	0.545	exon	ENSMUSG00000019907	Ppp1r12a	+
10:108240105|108251008	10	108240105	108251008	5	16	0.385	exon	ENSMUSG00000019907	Ppp1r12a	+
10:108240105|108251008	10	108240105	108251008	6	23	0.343	exon	ENSMUSG00000019907	Ppp1r12a	+
10:108240105|108251008	10	108240105	108251008	6	11	0.522	exon	ENSMUSG00000019907	Ppp1r12a	+
10:108240105|108251008	10	108240105	108251008	8	11	0.593	exon	ENSMUSG00000019907	Ppp1r12a	+
10:108240105|108253495	10	108240105	108253495	6	12	0.5	exon	ENSMUSG00000019907	Ppp1r12a	+
10:108264703|108269358	10	108264703	108269358	3	47	0.113	exon	ENSMUSG00000019907	Ppp1r12a	+
10:108264703|108269358	10	108264703	108269358	3	66	0.083	exon	ENSMUSG00000019907	Ppp1r12a	+
10:108264703|108271769	10	108264703	108271769	3	19	0.24	exon	ENSMUSG00000019907	Ppp1r12a	+
10:108264703|108274188	10	108264703	108274188	10	27	0.426	exon	ENSMUSG00000019907	Ppp1r12a	+
10:108264703|108274188	10	108264703	108274188	7	16	0.467	exon	ENSMUSG00000019907	Ppp1r12a	+
10:108268572|108274188	10	108268572	108274188	19	7	0.844	exon	ENSMUSG00000019907	Ppp1r12a	+
10:108268572|108274188	10	108268572	108274188	22	16	0.733	exon	ENSMUSG00000019907	Ppp1r12a	+
10:108268572|108274188	10	108268572	108274188	24	17	0.738	exon	ENSMUSG00000019907	Ppp1r12a	+
10:108268572|108274188	10	108268572	108274188	27	21	0.72	exon	ENSMUSG00000019907	Ppp1r12a	+
10:108268572|108274188	10	108268572	108274188	29	23	0.716	exon	ENSMUSG00000019907	Ppp1r12a	+
10:108268572|108274188	10	108268572	108274188	32	20	0.762	exon	ENSMUSG00000019907	Ppp1r12a	+
10:108268572|108274188	10	108268572	108274188	34	19	0.782	exon	ENSMUSG00000019907	Ppp1r12a	+
10:108268572|108274188	10	108268572	108274188	40	8	0.909	exon	ENSMUSG00000019907	Ppp1r12a	+
10:108268572|108274188	10	108268572	108274188	47	18	0.839	exon	ENSMUSG00000019907	Ppp1r12a	+
10:108268572|108274188	10	108268572	108274188	47	11	0.895	exon	ENSMUSG00000019907	Ppp1r12a	+
10:108268572|108274188	10	108268572	108274188	52	3	0.972	exon	ENSMUSG00000019907	Ppp1r12a	+
10:108268572|108274188	10	108268572	108274188	79	12	0.929	exon	ENSMUSG00000019907	Ppp1r12a	+
10:108271722|108274188	10	108271722	108274188	2	98	0.039	exon	ENSMUSG00000019907	Ppp1r12a	+
10:108409463|108412068	10	108409463	108412068	2	7	0.364	exon	ENSMUSG00000035873	Pawr	+
10:108409463|108412068	10	108409463	108412068	4	9	0.471	exon	ENSMUSG00000035873	Pawr	+
10:111204735|111233690	10	111204735	111233690	6	6	0.667	exon	ENSMUSG00000020189	Osbpl8	+
10:111224672|111233690	10	111224672	111233690	4	12	0.4	exon	ENSMUSG00000020189	Osbpl8	+
10:111224672|111233690	10	111224672	111233690	8	9	0.64	exon	ENSMUSG00000020189	Osbpl8	+
10:111246061|111255758	10	111246061	111255758	4	0	1	intron	ENSMUSG00000020189	Osbpl8	+
10:111273026|111277343	10	111273026	111277343	2	28	0.125	exon	ENSMUSG00000020189	Osbpl8	+
10:111273026|111277343	10	111273026	111277343	4	6	0.571	exon	ENSMUSG00000020189	Osbpl8	+
10:111273026|111277343	10	111273026	111277343	7	9	0.609	exon	ENSMUSG00000020189	Osbpl8	+
10:111273026|111277343	10	111273026	111277343	8	3	0.842	exon	ENSMUSG00000020189	Osbpl8	+
10:11178734|11185462	10	11178734	11185462	4	0	1	exon	ENSMUSG00000090112	Shprh	+
10:11178734|11185462	10	11178734	11185462	5	2	0.833	exon	ENSMUSG00000090112	Shprh	+
10:11178734|11185462	10	11178734	11185462	5	4	0.714	exon	ENSMUSG00000090112	Shprh	+
10:11178734|11185462	10	11178734	11185462	6	0	1	exon	ENSMUSG00000090112	Shprh	+
10:11178734|11185462	10	11178734	11185462	6	10	0.545	exon	ENSMUSG00000090112	Shprh	+
10:115229125|115233258	10	115229125	115233258	5	38	0.208	exon	ENSMUSG00000020130	Tbc1d15	-
10:115229125|115233258	10	115229125	115233258	8	17	0.485	exon	ENSMUSG00000020130	Tbc1d15	-
10:115229125|115233258	10	115229125	115233258	8	31	0.34	exon	ENSMUSG00000020130	Tbc1d15	-
10:115233120|115239346	10	115233120	115239346	8	31	0.34	exon	ENSMUSG00000020130	Tbc1d15	-
10:115294871|115302791	10	115294871	115302791	10	18	0.526	exon	ENSMUSG00000020132	Rab21	-
10:115294871|115302791	10	115294871	115302791	3	21	0.222	exon	ENSMUSG00000020132	Rab21	-
10:115294871|115302791	10	115294871	115302791	6	20	0.375	exon	ENSMUSG00000020132	Rab21	-
10:115390650|115398069	10	115390650	115398069	2	5	0.444	exon	ENSMUSG00000034163	Zfc3h1	+
10:115403200|115406562	10	115403200	115406562	9	23	0.439	exon	ENSMUSG00000034163	Zfc3h1	+
10:115406353|115406898	10	115406353	115406898	10	0	1	exon	ENSMUSG00000034163	Zfc3h1	+
10:115406353|115406898	10	115406353	115406898	11	6	0.786	exon	ENSMUSG00000034163	Zfc3h1	+
10:115406353|115406898	10	115406353	115406898	12	0	1	exon	ENSMUSG00000034163	Zfc3h1	+
10:115406353|115406898	10	115406353	115406898	13	13	0.667	exon	ENSMUSG00000034163	Zfc3h1	+
10:115406353|115406898	10	115406353	115406898	13	4	0.867	exon	ENSMUSG00000034163	Zfc3h1	+
10:115406353|115406898	10	115406353	115406898	15	0	1	exon	ENSMUSG00000034163	Zfc3h1	+
10:115406353|115406898	10	115406353	115406898	21	1	0.977	exon	ENSMUSG00000034163	Zfc3h1	+
10:115406353|115406898	10	115406353	115406898	7	5	0.737	exon	ENSMUSG00000034163	Zfc3h1	+
10:115406353|115406898	10	115406353	115406898	7	0	1	exon	ENSMUSG00000034163	Zfc3h1	+
10:115406353|115406898	10	115406353	115406898	8	3	0.842	exon	ENSMUSG00000034163	Zfc3h1	+
10:115411720|115415739	10	115411720	115415739	2	5	0.444	exon	ENSMUSG00000034163	Zfc3h1	+
10:115423384|115427146	10	115423384	115427146	2	3	0.571	exon	ENSMUSG00000034163	Zfc3h1	+
10:115423384|115427502	10	115423384	115427502	2	4	0.5	exon	ENSMUSG00000034163	Zfc3h1	+
10:116317366|116319602	10	116317366	116319602	10	27	0.426	exon	ENSMUSG00000020154	Ptprb	+
10:116317366|116319602	10	116317366	116319602	2	37	0.098	exon	ENSMUSG00000020154	Ptprb	+
10:116317366|116319602	10	116317366	116319602	5	53	0.159	exon	ENSMUSG00000020154	Ptprb	+
10:116349966|116361307	10	116349966	116361307	2	21	0.16	exon	ENSMUSG00000020154	Ptprb	+
10:116349966|116361307	10	116349966	116361307	4	17	0.32	exon	ENSMUSG00000020154	Ptprb	+
10:116352706|116361307	10	116352706	116361307	3	5	0.545	intron	ENSMUSG00000020154	Ptprb	+
10:116353791|116361307	10	116353791	116361307	10	27	0.426	exon	ENSMUSG00000020154	Ptprb	+
10:116353791|116361307	10	116353791	116361307	3	28	0.176	exon	ENSMUSG00000020154	Ptprb	+
10:116353791|116361307	10	116353791	116361307	7	12	0.538	exon	ENSMUSG00000020154	Ptprb	+
10:116353791|116361307	10	116353791	116361307	8	20	0.444	exon	ENSMUSG00000020154	Ptprb	+
10:116353791|116361307	10	116353791	116361307	9	24	0.429	exon	ENSMUSG00000020154	Ptprb	+
10:116363279|116369459	10	116363279	116369459	3	11	0.353	exon	ENSMUSG00000020154	Ptprb	+
10:116492292|116507188	10	116492292	116507188	4	28	0.222	exon	ENSMUSG00000020166	Cnot2	-
10:116498086|116499466	10	116498086	116499466	14	10	0.737	exon	ENSMUSG00000020166	Cnot2	-
10:116501192|116517383	10	116501192	116517383	3	105	0.054	exon	ENSMUSG00000020166	Cnot2	-
10:116504035|116507188	10	116504035	116507188	2	10	0.286	exon	ENSMUSG00000020166	Cnot2	-
10:116504035|116507188	10	116504035	116507188	2	13	0.235	exon	ENSMUSG00000020166	Cnot2	-
10:116504035|116507188	10	116504035	116507188	6	16	0.429	exon	ENSMUSG00000020166	Cnot2	-
10:116504035|116507188	10	116504035	116507188	7	20	0.412	exon	ENSMUSG00000020166	Cnot2	-
10:116517317|116527949	10	116517317	116527949	3	133	0.043	exon	ENSMUSG00000020166	Cnot2	-
10:116517317|116527949	10	116517317	116527949	4	163	0.047	exon	ENSMUSG00000020166	Cnot2	-
10:116517317|116527949	10	116517317	116527949	4	122	0.062	exon	ENSMUSG00000020166	Cnot2	-
10:116517317|116527949	10	116517317	116527949	6	168	0.067	exon	ENSMUSG00000020166	Cnot2	-
10:116517317|116537278	10	116517317	116537278	3	109	0.052	exon	ENSMUSG00000020166	Cnot2	-
10:116517317|116537278	10	116517317	116537278	4	118	0.063	exon	ENSMUSG00000020166	Cnot2	-
10:116517317|116549105	10	116517317	116549105	30	80	0.429	exon	ENSMUSG00000020166	Cnot2	-
10:116517317|116549105	10	116517317	116549105	34	85	0.444	exon	ENSMUSG00000020166	Cnot2	-
10:116517317|116549105	10	116517317	116549105	37	87	0.46	exon	ENSMUSG00000020166	Cnot2	-
10:116517317|116549105	10	116517317	116549105	40	71	0.53	exon	ENSMUSG00000020166	Cnot2	-
10:116517317|116549105	10	116517317	116549105	41	88	0.482	exon	ENSMUSG00000020166	Cnot2	-
10:116517317|116549105	10	116517317	116549105	43	101	0.46	exon	ENSMUSG00000020166	Cnot2	-
10:116517317|116549105	10	116517317	116549105	45	97	0.481	exon	ENSMUSG00000020166	Cnot2	-
10:116517317|116549105	10	116517317	116549105	45	130	0.409	exon	ENSMUSG00000020166	Cnot2	-
10:116517317|116549105	10	116517317	116549105	47	66	0.588	exon	ENSMUSG00000020166	Cnot2	-
10:116517317|116549105	10	116517317	116549105	49	114	0.462	exon	ENSMUSG00000020166	Cnot2	-
10:116517317|116549105	10	116517317	116549105	73	114	0.562	exon	ENSMUSG00000020166	Cnot2	-
10:116517317|116549105	10	116517317	116549105	73	81	0.643	exon	ENSMUSG00000020166	Cnot2	-
10:116517317|116549175	10	116517317	116549175	105	25	0.894	exon	ENSMUSG00000020166	Cnot2	-
10:116517317|116549175	10	116517317	116549175	109	14	0.94	exon	ENSMUSG00000020166	Cnot2	-
10:116517317|116549175	10	116517317	116549175	56	26	0.812	exon	ENSMUSG00000020166	Cnot2	-
10:116517317|116549175	10	116517317	116549175	56	29	0.794	exon	ENSMUSG00000020166	Cnot2	-
10:116517317|116549175	10	116517317	116549175	58	19	0.859	exon	ENSMUSG00000020166	Cnot2	-
10:116517317|116549175	10	116517317	116549175	72	56	0.72	exon	ENSMUSG00000020166	Cnot2	-
10:116517317|116549175	10	116517317	116549175	79	28	0.849	exon	ENSMUSG00000020166	Cnot2	-
10:116517317|116549175	10	116517317	116549175	84	25	0.87	exon	ENSMUSG00000020166	Cnot2	-
10:116517317|116549175	10	116517317	116549175	88	21	0.893	exon	ENSMUSG00000020166	Cnot2	-
10:116517317|116549175	10	116517317	116549175	89	49	0.784	exon	ENSMUSG00000020166	Cnot2	-
10:116517317|116549175	10	116517317	116549175	95	32	0.856	exon	ENSMUSG00000020166	Cnot2	-
10:116517317|116549175	10	116517317	116549175	96	24	0.889	exon	ENSMUSG00000020166	Cnot2	-
10:116527827|116549105	10	116527827	116549105	10	148	0.119	exon	ENSMUSG00000020166	Cnot2	-
10:116527827|116549105	10	116527827	116549105	10	217	0.084	exon	ENSMUSG00000020166	Cnot2	-
10:116527827|116549105	10	116527827	116549105	11	170	0.115	exon	ENSMUSG00000020166	Cnot2	-
10:116527827|116549105	10	116527827	116549105	15	165	0.154	exon	ENSMUSG00000020166	Cnot2	-
10:116527827|116549105	10	116527827	116549105	16	220	0.127	exon	ENSMUSG00000020166	Cnot2	-
10:116527827|116549105	10	116527827	116549105	16	154	0.172	exon	ENSMUSG00000020166	Cnot2	-
10:116527827|116549105	10	116527827	116549105	18	173	0.172	exon	ENSMUSG00000020166	Cnot2	-
10:116527827|116549105	10	116527827	116549105	21	203	0.171	exon	ENSMUSG00000020166	Cnot2	-
10:116527827|116549105	10	116527827	116549105	30	193	0.237	exon	ENSMUSG00000020166	Cnot2	-
10:116527827|116549105	10	116527827	116549105	3	150	0.038	exon	ENSMUSG00000020166	Cnot2	-
10:116527827|116549105	10	116527827	116549105	5	125	0.074	exon	ENSMUSG00000020166	Cnot2	-
10:116527827|116549105	10	116527827	116549105	5	162	0.058	exon	ENSMUSG00000020166	Cnot2	-
10:116527827|116549175	10	116527827	116549175	10	111	0.153	exon	ENSMUSG00000020166	Cnot2	-
10:116527827|116549175	10	116527827	116549175	11	88	0.2	exon	ENSMUSG00000020166	Cnot2	-
10:116527827|116549175	10	116527827	116549175	13	142	0.155	exon	ENSMUSG00000020166	Cnot2	-
10:116527827|116549175	10	116527827	116549175	15	84	0.263	exon	ENSMUSG00000020166	Cnot2	-
10:116527827|116549175	10	116527827	116549175	16	99	0.244	exon	ENSMUSG00000020166	Cnot2	-
10:116527827|116549175	10	116527827	116549175	16	105	0.234	exon	ENSMUSG00000020166	Cnot2	-
10:116527827|116549175	10	116527827	116549175	17	100	0.254	exon	ENSMUSG00000020166	Cnot2	-
10:116527827|116549175	10	116527827	116549175	18	106	0.254	exon	ENSMUSG00000020166	Cnot2	-
10:116527827|116549175	10	116527827	116549175	20	128	0.238	exon	ENSMUSG00000020166	Cnot2	-
10:116527827|116549175	10	116527827	116549175	28	104	0.35	exon	ENSMUSG00000020166	Cnot2	-
10:116527827|116549175	10	116527827	116549175	37	125	0.372	exon	ENSMUSG00000020166	Cnot2	-
10:116527827|116549175	10	116527827	116549175	42	163	0.34	exon	ENSMUSG00000020166	Cnot2	-
10:116910125|116939481	10	116910125	116939481	3	6	0.5	exon	ENSMUSG00000064181	Rab3ip	-
10:116928189|116939481	10	116928189	116939481	3	31	0.162	exon	ENSMUSG00000064181	Rab3ip	-
10:116928189|116939481	10	116928189	116939481	9	17	0.514	exon	ENSMUSG00000064181	Rab3ip	-
10:116937397|116939481	10	116937397	116939481	11	42	0.344	exon	ENSMUSG00000064181	Rab3ip	-
10:116937397|116939481	10	116937397	116939481	14	34	0.452	exon	ENSMUSG00000064181	Rab3ip	-
10:116937397|116939481	10	116937397	116939481	14	17	0.622	exon	ENSMUSG00000064181	Rab3ip	-
10:116937397|116939481	10	116937397	116939481	15	32	0.484	exon	ENSMUSG00000064181	Rab3ip	-
10:116937397|116939481	10	116937397	116939481	16	34	0.485	exon	ENSMUSG00000064181	Rab3ip	-
10:116937397|116939481	10	116937397	116939481	17	36	0.486	exon	ENSMUSG00000064181	Rab3ip	-
10:116937397|116939481	10	116937397	116939481	17	17	0.667	exon	ENSMUSG00000064181	Rab3ip	-
10:116937397|116939481	10	116937397	116939481	19	21	0.644	exon	ENSMUSG00000064181	Rab3ip	-
10:116937397|116939481	10	116937397	116939481	23	22	0.676	exon	ENSMUSG00000064181	Rab3ip	-
10:116937397|116939481	10	116937397	116939481	25	24	0.676	exon	ENSMUSG00000064181	Rab3ip	-
10:116937397|116939481	10	116937397	116939481	4	38	0.174	exon	ENSMUSG00000064181	Rab3ip	-
10:117355935|117360555	10	117355935	117360555	3	10	0.375	exon	ENSMUSG00000055531	Cpsf6	-
10:117355935|117360555	10	117355935	117360555	5	24	0.294	exon	ENSMUSG00000055531	Cpsf6	-
10:117355935|117360951	10	117355935	117360951	3	23	0.207	exon	ENSMUSG00000055531	Cpsf6	-
10:117355935|117360951	10	117355935	117360951	3	18	0.25	exon	ENSMUSG00000055531	Cpsf6	-
10:117355935|117360951	10	117355935	117360951	3	22	0.214	exon	ENSMUSG00000055531	Cpsf6	-
10:117355935|117360951	10	117355935	117360951	4	8	0.5	exon	ENSMUSG00000055531	Cpsf6	-
10:117355935|117367988	10	117355935	117367988	12	18	0.571	exon	ENSMUSG00000055531	Cpsf6	-
10:117355935|117367988	10	117355935	117367988	12	16	0.6	exon	ENSMUSG00000055531	Cpsf6	-
10:117355935|117367988	10	117355935	117367988	18	36	0.5	exon	ENSMUSG00000055531	Cpsf6	-
10:117355935|117367988	10	117355935	117367988	19	25	0.603	exon	ENSMUSG00000055531	Cpsf6	-
10:117355935|117367988	10	117355935	117367988	6	28	0.3	exon	ENSMUSG00000055531	Cpsf6	-
10:117355935|117367988	10	117355935	117367988	8	29	0.356	exon	ENSMUSG00000055531	Cpsf6	-
10:117355935|117367988	10	117355935	117367988	8	10	0.615	exon	ENSMUSG00000055531	Cpsf6	-
10:117366081|117367988	10	117366081	117367988	18	29	0.554	exon	ENSMUSG00000055531	Cpsf6	-
10:117366081|117367988	10	117366081	117367988	31	38	0.62	exon	ENSMUSG00000055531	Cpsf6	-
10:117366081|117367988	10	117366081	117367988	38	13	0.854	exon	ENSMUSG00000055531	Cpsf6	-
10:117366081|117367988	10	117366081	117367988	42	32	0.724	exon	ENSMUSG00000055531	Cpsf6	-
10:117366081|117367988	10	117366081	117367988	45	33	0.732	exon	ENSMUSG00000055531	Cpsf6	-
10:117366081|117367988	10	117366081	117367988	48	40	0.706	exon	ENSMUSG00000055531	Cpsf6	-
10:117366081|117367988	10	117366081	117367988	51	33	0.756	exon	ENSMUSG00000055531	Cpsf6	-
10:117366081|117367988	10	117366081	117367988	52	35	0.748	exon	ENSMUSG00000055531	Cpsf6	-
10:117366081|117367988	10	117366081	117367988	52	37	0.738	exon	ENSMUSG00000055531	Cpsf6	-
10:117366081|117367988	10	117366081	117367988	59	25	0.825	exon	ENSMUSG00000055531	Cpsf6	-
10:117366081|117367988	10	117366081	117367988	68	43	0.76	exon	ENSMUSG00000055531	Cpsf6	-
10:117692582|117695068	10	117692582	117695068	100	16	0.926	exon	ENSMUSG00000020184	Mdm2	-
10:117692582|117695068	10	117692582	117695068	101	34	0.856	exon	ENSMUSG00000020184	Mdm2	-
10:117692582|117695068	10	117692582	117695068	102	26	0.887	exon	ENSMUSG00000020184	Mdm2	-
10:117692582|117695068	10	117692582	117695068	122	30	0.891	exon	ENSMUSG00000020184	Mdm2	-
10:117692582|117695068	10	117692582	117695068	55	22	0.833	exon	ENSMUSG00000020184	Mdm2	-
10:117692582|117695068	10	117692582	117695068	57	27	0.809	exon	ENSMUSG00000020184	Mdm2	-
10:117692582|117695068	10	117692582	117695068	65	19	0.872	exon	ENSMUSG00000020184	Mdm2	-
10:117692582|117695068	10	117692582	117695068	72	19	0.883	exon	ENSMUSG00000020184	Mdm2	-
10:117692582|117695068	10	117692582	117695068	72	29	0.832	exon	ENSMUSG00000020184	Mdm2	-
10:117692582|117695068	10	117692582	117695068	72	19	0.883	exon	ENSMUSG00000020184	Mdm2	-
10:117692582|117695068	10	117692582	117695068	80	20	0.889	exon	ENSMUSG00000020184	Mdm2	-
10:117692582|117695068	10	117692582	117695068	80	22	0.879	exon	ENSMUSG00000020184	Mdm2	-
10:117692582|117705229	10	117692582	117705229	15	14	0.682	exon	ENSMUSG00000020184	Mdm2	-
10:117692582|117705229	10	117692582	117705229	9	13	0.581	exon	ENSMUSG00000020184	Mdm2	-
10:117692582|117705229	10	117692582	117705229	9	13	0.581	exon	ENSMUSG00000020184	Mdm2	-
10:117694905|117705229	10	117694905	117705229	3	18	0.25	exon	ENSMUSG00000020184	Mdm2	-
10:117694905|117705229	10	117694905	117705229	4	18	0.308	exon	ENSMUSG00000020184	Mdm2	-
10:117696381|117705229	10	117696381	117705229	2	23	0.148	exon	ENSMUSG00000020184	Mdm2	-
10:117701565|117702335	10	117701565	117702335	7	48	0.226	exon	ENSMUSG00000020184	Mdm2	-
10:117701565|117702335	10	117701565	117702335	8	68	0.19	exon	ENSMUSG00000020184	Mdm2	-
10:117701565|117705229	10	117701565	117705229	16	13	0.711	exon	ENSMUSG00000020184	Mdm2	-
10:117701565|117705229	10	117701565	117705229	22	48	0.478	exon	ENSMUSG00000020184	Mdm2	-
10:117701565|117705229	10	117701565	117705229	23	24	0.657	exon	ENSMUSG00000020184	Mdm2	-
10:117701565|117705229	10	117701565	117705229	27	25	0.684	exon	ENSMUSG00000020184	Mdm2	-
10:117701565|117705229	10	117701565	117705229	30	35	0.632	exon	ENSMUSG00000020184	Mdm2	-
10:117701565|117705229	10	117701565	117705229	30	29	0.674	exon	ENSMUSG00000020184	Mdm2	-
10:117701565|117705229	10	117701565	117705229	32	49	0.566	exon	ENSMUSG00000020184	Mdm2	-
10:117701565|117705229	10	117701565	117705229	40	32	0.714	exon	ENSMUSG00000020184	Mdm2	-
10:117701565|117705229	10	117701565	117705229	41	35	0.701	exon	ENSMUSG00000020184	Mdm2	-
10:117701565|117705229	10	117701565	117705229	49	40	0.71	exon	ENSMUSG00000020184	Mdm2	-
10:117777129|117777664	10	117777129	117777664	19	3	0.927	exon	ENSMUSG00000052798	Nup107	-
10:117777129|117777664	10	117777129	117777664	22	2	0.957	exon	ENSMUSG00000052798	Nup107	-
10:117777129|117777664	10	117777129	117777664	6	3	0.8	exon	ENSMUSG00000052798	Nup107	-
10:117784995|117787911	10	117784995	117787911	3	1	0.857	exon	ENSMUSG00000052798	Nup107	-
10:117784995|117787911	10	117784995	117787911	5	3	0.769	exon	ENSMUSG00000052798	Nup107	-
10:117784995|117787911	10	117784995	117787911	5	0	1	exon	ENSMUSG00000052798	Nup107	-
10:117784995|117787911	10	117784995	117787911	6	7	0.632	exon	ENSMUSG00000052798	Nup107	-
10:117784995|117787911	10	117784995	117787911	8	1	0.941	exon	ENSMUSG00000052798	Nup107	-
10:117817344|117818609	10	117817344	117818609	12	47	0.338	exon	ENSMUSG00000052681	Rap1b	-
10:117817344|117818609	10	117817344	117818609	14	30	0.483	exon	ENSMUSG00000052681	Rap1b	-
10:117817344|117818609	10	117817344	117818609	16	56	0.364	exon	ENSMUSG00000052681	Rap1b	-
10:117817344|117818609	10	117817344	117818609	19	30	0.559	exon	ENSMUSG00000052681	Rap1b	-
10:117817344|117818609	10	117817344	117818609	26	13	0.8	exon	ENSMUSG00000052681	Rap1b	-
10:117817344|117818609	10	117817344	117818609	5	46	0.179	exon	ENSMUSG00000052681	Rap1b	-
10:117817344|117818609	10	117817344	117818609	8	54	0.229	exon	ENSMUSG00000052681	Rap1b	-
10:117817344|117818609	10	117817344	117818609	8	97	0.142	exon	ENSMUSG00000052681	Rap1b	-
10:117817344|117818609	10	117817344	117818609	8	33	0.327	exon	ENSMUSG00000052681	Rap1b	-
10:117817344|117818609	10	117817344	117818609	9	52	0.257	exon	ENSMUSG00000052681	Rap1b	-
10:117817344|117818609	10	117817344	117818609	9	54	0.25	exon	ENSMUSG00000052681	Rap1b	-
10:117820462|117822869	10	117820462	117822869	16	10	0.762	exon	ENSMUSG00000052681	Rap1b	-
10:117820462|117822869	10	117820462	117822869	21	35	0.545	exon	ENSMUSG00000052681	Rap1b	-
10:117820462|117822869	10	117820462	117822869	4	12	0.4	exon	ENSMUSG00000052681	Rap1b	-
10:117820462|117822869	10	117820462	117822869	6	19	0.387	exon	ENSMUSG00000052681	Rap1b	-
10:117820462|117822869	10	117820462	117822869	8	42	0.276	exon	ENSMUSG00000052681	Rap1b	-
10:120089408|120092688	10	120089408	120092688	18	13	0.735	exon	ENSMUSG00000020228	Helb	-
10:120089408|120092688	10	120089408	120092688	3	2	0.75	exon	ENSMUSG00000020228	Helb	-
10:120089408|120092688	10	120089408	120092688	4	4	0.667	exon	ENSMUSG00000020228	Helb	-
10:120089408|120092688	10	120089408	120092688	4	7	0.533	exon	ENSMUSG00000020228	Helb	-
10:120089408|120092688	10	120089408	120092688	5	11	0.476	exon	ENSMUSG00000020228	Helb	-
10:120145646|120146629	10	120145646	120146629	2	1	0.8	exon	ENSMUSG00000020227	Irak3	-
10:120176231|120182708	10	120176231	120182708	3	7	0.462	exon	ENSMUSG00000020227	Irak3	-
10:120825108|120852092	10	120825108	120852092	107	6	0.973	exon	ENSMUSG00000051236	Msrb3	-
10:120825108|120852092	10	120825108	120852092	108	14	0.939	exon	ENSMUSG00000051236	Msrb3	-
10:120825108|120852092	10	120825108	120852092	69	12	0.92	exon	ENSMUSG00000051236	Msrb3	-
10:120825108|120852092	10	120825108	120852092	85	22	0.885	exon	ENSMUSG00000051236	Msrb3	-
10:120825108|120852092	10	120825108	120852092	87	16	0.916	exon	ENSMUSG00000051236	Msrb3	-
10:120825108|120852092	10	120825108	120852092	98	51	0.794	exon	ENSMUSG00000051236	Msrb3	-
10:120843411|120852048	10	120843411	120852048	5	56	0.152	intron	ENSMUSG00000051236	Msrb3	-
10:120849976|120852092	10	120849976	120852092	16	34	0.485	exon	ENSMUSG00000051236	Msrb3	-
10:120849976|120852092	10	120849976	120852092	5	41	0.196	exon	ENSMUSG00000051236	Msrb3	-
10:120849976|120852092	10	120849976	120852092	7	32	0.304	exon	ENSMUSG00000051236	Msrb3	-
10:120849976|120871151	10	120849976	120871151	2	32	0.111	exon	ENSMUSG00000051236	Msrb3	-
10:120925767|120933709	10	120925767	120933709	8	8	0.667	exon	ENSMUSG00000048661	Lemd3	-
10:120947204|120949363	10	120947204	120949363	4	26	0.235	exon	ENSMUSG00000048661	Lemd3	-
10:120947204|120952255	10	120947204	120952255	118	19	0.925	exon	ENSMUSG00000048661	Lemd3	-
10:120947204|120952255	10	120947204	120952255	124	29	0.895	exon	ENSMUSG00000048661	Lemd3	-
10:120947204|120952255	10	120947204	120952255	52	20	0.839	exon	ENSMUSG00000048661	Lemd3	-
10:120947204|120952255	10	120947204	120952255	55	16	0.873	exon	ENSMUSG00000048661	Lemd3	-
10:120947204|120952255	10	120947204	120952255	75	13	0.92	exon	ENSMUSG00000048661	Lemd3	-
10:120947204|120952255	10	120947204	120952255	78	8	0.951	exon	ENSMUSG00000048661	Lemd3	-
10:120947204|120952255	10	120947204	120952255	91	11	0.943	exon	ENSMUSG00000048661	Lemd3	-
10:120947204|120952255	10	120947204	120952255	95	14	0.931	exon	ENSMUSG00000048661	Lemd3	-
10:120949297|120952255	10	120949297	120952255	2	47	0.078	exon	ENSMUSG00000048661	Lemd3	-
10:120949297|120952255	10	120949297	120952255	4	52	0.133	exon	ENSMUSG00000048661	Lemd3	-
10:121294589|121304471	10	121294589	121304471	3	1	0.857	exon	ENSMUSG00000052302	Tbc1d30	-
10:121371144|121376734	10	121371144	121376734	13	74	0.26	exon	ENSMUSG00000034707	Gns	+
10:121371144|121376734	10	121371144	121376734	3	79	0.071	exon	ENSMUSG00000034707	Gns	+
10:121371144|121376734	10	121371144	121376734	4	63	0.113	exon	ENSMUSG00000034707	Gns	+
10:121371144|121376734	10	121371144	121376734	5	57	0.149	exon	ENSMUSG00000034707	Gns	+
10:121371144|121376734	10	121371144	121376734	5	66	0.132	exon	ENSMUSG00000034707	Gns	+
10:121371144|121376734	10	121371144	121376734	7	71	0.165	exon	ENSMUSG00000034707	Gns	+
10:121371144|121376734	10	121371144	121376734	8	39	0.291	exon	ENSMUSG00000034707	Gns	+
10:121371144|121383443	10	121371144	121383443	4	27	0.229	exon	ENSMUSG00000034707	Gns	+
10:121374358|121383443	10	121374358	121383443	5	43	0.189	exon	ENSMUSG00000034707	Gns	+
10:121551251|121551593	10	121551251	121551593	10	8	0.714	exon	ENSMUSG00000020115	Tbk1	-
10:121552200|121553068	10	121552200	121553068	16	14	0.696	exon	ENSMUSG00000020115	Tbk1	-
10:121552200|121553068	10	121552200	121553068	19	6	0.864	exon	ENSMUSG00000020115	Tbk1	-
10:121552200|121553068	10	121552200	121553068	21	29	0.592	exon	ENSMUSG00000020115	Tbk1	-
10:121552200|121553068	10	121552200	121553068	41	12	0.872	exon	ENSMUSG00000020115	Tbk1	-
10:121552200|121553068	10	121552200	121553068	41	9	0.901	exon	ENSMUSG00000020115	Tbk1	-
10:121552200|121553068	10	121552200	121553068	51	21	0.829	exon	ENSMUSG00000020115	Tbk1	-
10:121561577|121570791	10	121561577	121570791	2	15	0.211	exon	ENSMUSG00000020115	Tbk1	-
10:121561577|121570791	10	121561577	121570791	5	8	0.556	exon	ENSMUSG00000020115	Tbk1	-
10:121568029|121570791	10	121568029	121570791	11	21	0.512	exon	ENSMUSG00000020115	Tbk1	-
10:121568029|121570791	10	121568029	121570791	15	21	0.588	exon	ENSMUSG00000020115	Tbk1	-
10:121568029|121570791	10	121568029	121570791	15	20	0.6	exon	ENSMUSG00000020115	Tbk1	-
10:121568029|121570791	10	121568029	121570791	20	15	0.727	exon	ENSMUSG00000020115	Tbk1	-
10:121568029|121570791	10	121568029	121570791	2	12	0.25	exon	ENSMUSG00000020115	Tbk1	-
10:121568029|121570791	10	121568029	121570791	3	10	0.375	exon	ENSMUSG00000020115	Tbk1	-
10:121568029|121570791	10	121568029	121570791	5	14	0.417	exon	ENSMUSG00000020115	Tbk1	-
10:121568029|121570791	10	121568029	121570791	7	19	0.424	exon	ENSMUSG00000020115	Tbk1	-
10:121596184|121602420	10	121596184	121602420	5	3	0.769	exon	ENSMUSG00000034667	Xpot	-
10:121611476|121613671	10	121611476	121613671	3	8	0.429	exon	ENSMUSG00000034667	Xpot	-
10:121613223|121615223	10	121613223	121615223	4	0	1	exon	ENSMUSG00000034667	Xpot	-
10:121619093|121622991	10	121619093	121622991	3	2	0.75	exon	ENSMUSG00000034667	Xpot	-
10:121619093|121622991	10	121619093	121622991	6	16	0.429	exon	ENSMUSG00000034667	Xpot	-
10:121869717|121870510	10	121869717	121870510	2	0	1	exon	ENSMUSG00000020121	Srgap1	-
10:121869717|121870510	10	121869717	121870510	2	1	0.8	exon	ENSMUSG00000020121	Srgap1	-
10:121869717|121870510	10	121869717	121870510	9	4	0.818	exon	ENSMUSG00000020121	Srgap1	-
10:121925816|121931509	10	121925816	121931509	10	0	1	exon	ENSMUSG00000020121	Srgap1	-
10:121925816|121931509	10	121925816	121931509	19	2	0.95	exon	ENSMUSG00000020121	Srgap1	-
10:121925816|121931509	10	121925816	121931509	21	0	1	exon	ENSMUSG00000020121	Srgap1	-
10:121925816|121931509	10	121925816	121931509	22	4	0.917	exon	ENSMUSG00000020121	Srgap1	-
10:121925816|121931509	10	121925816	121931509	23	1	0.979	exon	ENSMUSG00000020121	Srgap1	-
10:121925816|121931509	10	121925816	121931509	25	2	0.962	exon	ENSMUSG00000020121	Srgap1	-
10:121925816|121931509	10	121925816	121931509	28	1	0.982	exon	ENSMUSG00000020121	Srgap1	-
10:121925816|121931509	10	121925816	121931509	30	1	0.984	exon	ENSMUSG00000020121	Srgap1	-
10:121925816|121931509	10	121925816	121931509	5	0	1	exon	ENSMUSG00000020121	Srgap1	-
10:122088879|122096094	10	122088879	122096094	3	31	0.162	exon	ENSMUSG00000034620	Tmem5	-
10:122401249|122404435	10	122401249	122404435	3	8	0.429	exon	ENSMUSG00000112774	Gm36041	+
10:122430750|122431325	10	122430750	122431325	11	19	0.537	exon	ENSMUSG00000112774	Gm36041	+
10:122430750|122431325	10	122430750	122431325	12	1	0.96	exon	ENSMUSG00000112774	Gm36041	+
10:122430750|122431325	10	122430750	122431325	17	4	0.895	exon	ENSMUSG00000112774	Gm36041	+
10:122430750|122431325	10	122430750	122431325	18	19	0.655	exon	ENSMUSG00000112774	Gm36041	+
10:122430750|122431325	10	122430750	122431325	21	9	0.824	exon	ENSMUSG00000112774	Gm36041	+
10:122430750|122431325	10	122430750	122431325	27	21	0.72	exon	ENSMUSG00000112774	Gm36041	+
10:122430750|122431325	10	122430750	122431325	29	10	0.853	exon	ENSMUSG00000112774	Gm36041	+
10:122430750|122431325	10	122430750	122431325	41	40	0.672	exon	ENSMUSG00000112774	Gm36041	+
10:122430750|122431325	10	122430750	122431325	6	13	0.48	exon	ENSMUSG00000112774	Gm36041	+
10:122430750|122431325	10	122430750	122431325	8	12	0.571	exon	ENSMUSG00000112774	Gm36041	+
10:122782183|122811559	10	122782183	122811559	3	9	0.4	exon	ENSMUSG00000034613	Ppm1h	+
10:122904092|122920845	10	122904092	122920845	2	2	0.667	exon	ENSMUSG00000034613	Ppm1h	+
10:122904092|122920845	10	122904092	122920845	22	9	0.83	exon	ENSMUSG00000034613	Ppm1h	+
10:122904092|122920845	10	122904092	122920845	5	8	0.556	exon	ENSMUSG00000034613	Ppm1h	+
10:122904092|122920845	10	122904092	122920845	7	7	0.667	exon	ENSMUSG00000034613	Ppm1h	+
10:122904092|122920845	10	122904092	122920845	9	8	0.692	exon	ENSMUSG00000034613	Ppm1h	+
10:122904092|122920845	10	122904092	122920845	9	0	1	exon	ENSMUSG00000034613	Ppm1h	+
10:123006972|123015139	10	123006972	123015139	2	18	0.182	exon	ENSMUSG00000034602	Mon2	-
10:123014941|123016556	10	123014941	123016556	4	23	0.258	exon	ENSMUSG00000034602	Mon2	-
10:123014941|123016556	10	123014941	123016556	9	34	0.346	exon	ENSMUSG00000034602	Mon2	-
10:123022834|123024011	10	123022834	123024011	5	18	0.357	exon	ENSMUSG00000034602	Mon2	-
10:123124964|123125927	10	123124964	123125927	4	27	0.229	exon	ENSMUSG00000020124	Usp15	-
10:123125413|123125927	10	123125413	123125927	2	27	0.129	exon	ENSMUSG00000020124	Usp15	-
10:123130941|123133129	10	123130941	123133129	11	20	0.524	exon	ENSMUSG00000020124	Usp15	-
10:123130941|123146938	10	123130941	123146938	13	8	0.765	exon	ENSMUSG00000020124	Usp15	-
10:123130941|123146938	10	123130941	123146938	5	12	0.455	exon	ENSMUSG00000020124	Usp15	-
10:123130941|123146938	10	123130941	123146938	9	12	0.6	exon	ENSMUSG00000020124	Usp15	-
10:123132956|123146938	10	123132956	123146938	10	25	0.444	exon	ENSMUSG00000020124	Usp15	-
10:123146794|123153127	10	123146794	123153127	8	18	0.471	exon	ENSMUSG00000020124	Usp15	-
10:123146794|123181800	10	123146794	123181800	4	19	0.296	exon	ENSMUSG00000020124	Usp15	-
10:123146794|123181800	10	123146794	123181800	5	8	0.556	exon	ENSMUSG00000020124	Usp15	-
10:123146794|123181800	10	123146794	123181800	5	18	0.357	exon	ENSMUSG00000020124	Usp15	-
10:123163593|123181800	10	123163593	123181800	16	10	0.762	exon	ENSMUSG00000020124	Usp15	-
10:123163593|123181800	10	123163593	123181800	16	7	0.821	exon	ENSMUSG00000020124	Usp15	-
10:123163593|123181800	10	123163593	123181800	4	14	0.364	exon	ENSMUSG00000020124	Usp15	-
10:123163593|123181800	10	123163593	123181800	4	17	0.32	exon	ENSMUSG00000020124	Usp15	-
10:123163593|123181800	10	123163593	123181800	5	12	0.455	exon	ENSMUSG00000020124	Usp15	-
10:123168227|123181800	10	123168227	123181800	2	25	0.138	exon	ENSMUSG00000020124	Usp15	-
10:123168227|123181800	10	123168227	123181800	4	16	0.333	exon	ENSMUSG00000020124	Usp15	-
10:123168227|123181800	10	123168227	123181800	5	14	0.417	exon	ENSMUSG00000020124	Usp15	-
10:123168227|123181800	10	123168227	123181800	6	15	0.444	exon	ENSMUSG00000020124	Usp15	-
10:123168227|123181800	10	123168227	123181800	7	18	0.438	exon	ENSMUSG00000020124	Usp15	-
10:123168227|123181800	10	123168227	123181800	8	24	0.4	exon	ENSMUSG00000020124	Usp15	-
10:123168227|123181800	10	123168227	123181800	8	13	0.552	exon	ENSMUSG00000020124	Usp15	-
10:123704359|123705824	10	123704359	123705824	3	0	1	exon	ENSMUSG00000044071	Fam19a2	+
10:12413936|12455564	10	12413936	12455564	3	12	0.333	exon	ENSMUSG00000019820	Utrn	-
10:12436281|12448092	10	12436281	12448092	10	31	0.392	exon	ENSMUSG00000019820	Utrn	-
10:12436281|12448092	10	12436281	12448092	13	29	0.473	exon	ENSMUSG00000019820	Utrn	-
10:12436281|12448092	10	12436281	12448092	2	46	0.08	exon	ENSMUSG00000019820	Utrn	-
10:12436281|12448092	10	12436281	12448092	6	26	0.316	exon	ENSMUSG00000019820	Utrn	-
10:12436281|12455564	10	12436281	12455564	18	23	0.61	exon	ENSMUSG00000019820	Utrn	-
10:12436281|12455564	10	12436281	12455564	20	18	0.69	exon	ENSMUSG00000019820	Utrn	-
10:12436281|12455564	10	12436281	12455564	21	17	0.712	exon	ENSMUSG00000019820	Utrn	-
10:12436281|12455564	10	12436281	12455564	24	18	0.727	exon	ENSMUSG00000019820	Utrn	-
10:12436281|12455564	10	12436281	12455564	26	14	0.788	exon	ENSMUSG00000019820	Utrn	-
10:12436281|12455564	10	12436281	12455564	28	39	0.589	exon	ENSMUSG00000019820	Utrn	-
10:12436281|12455564	10	12436281	12455564	31	16	0.795	exon	ENSMUSG00000019820	Utrn	-
10:12436281|12455564	10	12436281	12455564	33	39	0.629	exon	ENSMUSG00000019820	Utrn	-
10:12436281|12455564	10	12436281	12455564	34	24	0.739	exon	ENSMUSG00000019820	Utrn	-
10:12436281|12455564	10	12436281	12455564	36	15	0.828	exon	ENSMUSG00000019820	Utrn	-
10:12436281|12455564	10	12436281	12455564	40	17	0.825	exon	ENSMUSG00000019820	Utrn	-
10:12436281|12455564	10	12436281	12455564	44	17	0.838	exon	ENSMUSG00000019820	Utrn	-
10:12439627|12448092	10	12439627	12448092	2	43	0.085	exon	ENSMUSG00000019820	Utrn	-
10:12439627|12455564	10	12439627	12455564	2	27	0.129	exon	ENSMUSG00000019820	Utrn	-
10:12439627|12455564	10	12439627	12455564	2	33	0.108	exon	ENSMUSG00000019820	Utrn	-
10:12439627|12455564	10	12439627	12455564	2	35	0.103	exon	ENSMUSG00000019820	Utrn	-
10:12439627|12455564	10	12439627	12455564	6	26	0.316	exon	ENSMUSG00000019820	Utrn	-
10:12439627|12455564	10	12439627	12455564	9	57	0.24	exon	ENSMUSG00000019820	Utrn	-
10:12475271|12486654	10	12475271	12486654	2	7	0.364	exon	ENSMUSG00000019820	Utrn	-
10:12525338|12538213	10	12525338	12538213	10	9	0.69	exon	ENSMUSG00000019820	Utrn	-
10:12525338|12538213	10	12525338	12538213	14	9	0.757	exon	ENSMUSG00000019820	Utrn	-
10:12525338|12538213	10	12525338	12538213	2	13	0.235	exon	ENSMUSG00000019820	Utrn	-
10:12525338|12538213	10	12525338	12538213	3	10	0.375	exon	ENSMUSG00000019820	Utrn	-
10:12525338|12538213	10	12525338	12538213	7	3	0.824	exon	ENSMUSG00000019820	Utrn	-
10:125294595|125302081	10	125294595	125302081	17	10	0.773	exon	ENSMUSG00000020102	Slc16a7	-
10:125294595|125302081	10	125294595	125302081	3	13	0.316	exon	ENSMUSG00000020102	Slc16a7	-
10:125294595|125302081	10	125294595	125302081	3	21	0.222	exon	ENSMUSG00000020102	Slc16a7	-
10:125294595|125302081	10	125294595	125302081	5	5	0.667	exon	ENSMUSG00000020102	Slc16a7	-
10:125294595|125302081	10	125294595	125302081	5	6	0.625	exon	ENSMUSG00000020102	Slc16a7	-
10:125294595|125302081	10	125294595	125302081	6	14	0.462	exon	ENSMUSG00000020102	Slc16a7	-
10:125294595|125302081	10	125294595	125302081	6	32	0.273	exon	ENSMUSG00000020102	Slc16a7	-
10:125298622|125302081	10	125298622	125302081	2	7	0.364	exon	ENSMUSG00000020102	Slc16a7	-
10:125339139|125341850	10	125339139	125341850	3	0	1	exon	ENSMUSG00000020102	Slc16a7	-
10:125339139|125341850	10	125339139	125341850	5	10	0.5	exon	ENSMUSG00000020102	Slc16a7	-
10:125339139|125341850	10	125339139	125341850	8	0	1	exon	ENSMUSG00000020102	Slc16a7	-
10:125994418|126000160	10	125994418	126000160	2	19	0.174	exon	ENSMUSG00000020105	Lrig3	+
10:125994418|126000160	10	125994418	126000160	4	17	0.32	exon	ENSMUSG00000020105	Lrig3	+
10:12621191|12654834	10	12621191	12654834	4	14	0.364	exon	ENSMUSG00000019820	Utrn	-
10:12633944|12643611	10	12633944	12643611	2	4	0.5	exon	ENSMUSG00000019820	Utrn	-
10:12633944|12643611	10	12633944	12643611	3	6	0.5	exon	ENSMUSG00000019820	Utrn	-
10:12633944|12654834	10	12633944	12654834	3	6	0.5	exon	ENSMUSG00000019820	Utrn	-
10:12633944|12654834	10	12633944	12654834	6	4	0.75	exon	ENSMUSG00000019820	Utrn	-
10:12636596|12641044	10	12636596	12641044	5	23	0.303	exon	ENSMUSG00000019820	Utrn	-
10:12640927|12654834	10	12640927	12654834	2	14	0.222	exon	ENSMUSG00000019820	Utrn	-
10:12660779|12663538	10	12660779	12663538	4	14	0.364	exon	ENSMUSG00000019820	Utrn	-
10:12660779|12663538	10	12660779	12663538	6	12	0.5	exon	ENSMUSG00000019820	Utrn	-
10:12660779|12663538	10	12660779	12663538	6	22	0.353	exon	ENSMUSG00000019820	Utrn	-
10:12660779|12663538	10	12660779	12663538	7	21	0.4	exon	ENSMUSG00000019820	Utrn	-
10:12660779|12663538	10	12660779	12663538	9	16	0.529	exon	ENSMUSG00000019820	Utrn	-
10:12697989|12699115	10	12697989	12699115	12	9	0.727	exon	ENSMUSG00000019820	Utrn	-
10:12697989|12699115	10	12697989	12699115	2	17	0.19	exon	ENSMUSG00000019820	Utrn	-
10:12697989|12699115	10	12697989	12699115	5	20	0.333	exon	ENSMUSG00000019820	Utrn	-
10:126991531|126993908	10	126991531	126993908	5	0	1	exon	ENSMUSG00000078429	Ctdsp2	+
10:126991531|126993908	10	126991531	126993908	7	1	0.933	exon	ENSMUSG00000078429	Ctdsp2	+
10:127028365|127029682	10	127028365	127029682	10	40	0.333	exon	ENSMUSG00000040521	Tsfm	-
10:127028365|127029682	10	127028365	127029682	10	29	0.408	exon	ENSMUSG00000040521	Tsfm	-
10:127028365|127029682	10	127028365	127029682	4	15	0.348	exon	ENSMUSG00000040521	Tsfm	-
10:127028365|127029682	10	127028365	127029682	4	42	0.16	exon	ENSMUSG00000040521	Tsfm	-
10:127028365|127029682	10	127028365	127029682	7	30	0.318	exon	ENSMUSG00000040521	Tsfm	-
10:12709966|12711583	10	12709966	12711583	6	16	0.429	exon	ENSMUSG00000019820	Utrn	-
10:127119403|127120545	10	127119403	127120545	5	431	0.023	exon	ENSMUSG00000040462	Os9	-
10:127119403|127120545	10	127119403	127120545	6	320	0.036	exon	ENSMUSG00000040462	Os9	-
10:12713254|12727912	10	12713254	12727912	13	7	0.788	exon	ENSMUSG00000019820	Utrn	-
10:12713254|12727912	10	12713254	12727912	3	2	0.75	exon	ENSMUSG00000019820	Utrn	-
10:12713254|12727912	10	12713254	12727912	4	13	0.381	exon	ENSMUSG00000019820	Utrn	-
10:12713254|12727912	10	12713254	12727912	5	16	0.385	exon	ENSMUSG00000019820	Utrn	-
10:12713254|12727912	10	12713254	12727912	6	12	0.5	exon	ENSMUSG00000019820	Utrn	-
10:12713254|12727912	10	12713254	12727912	6	13	0.48	exon	ENSMUSG00000019820	Utrn	-
10:12713254|12727912	10	12713254	12727912	9	16	0.529	exon	ENSMUSG00000019820	Utrn	-
10:127166718|127167542	10	127166718	127167542	3	16	0.273	exon	ENSMUSG00000006731	B4galnt1	+
10:127176572|127177169	10	127176572	127177169	3	2	0.75	exon	ENSMUSG00000040441	Slc26a10	-
10:127176572|127177169	10	127176572	127177169	4	2	0.8	exon	ENSMUSG00000040441	Slc26a10	-
10:127176572|127177169	10	127176572	127177169	5	2	0.833	exon	ENSMUSG00000040441	Slc26a10	-
10:12720018|12720942	10	12720018	12720942	13	64	0.289	exon	ENSMUSG00000019820	Utrn	-
10:12720018|12720942	10	12720018	12720942	5	76	0.116	exon	ENSMUSG00000019820	Utrn	-
10:12720018|12720942	10	12720018	12720942	7	54	0.206	exon	ENSMUSG00000019820	Utrn	-
10:12720018|12720942	10	12720018	12720942	8	43	0.271	exon	ENSMUSG00000019820	Utrn	-
10:127274714|127278408	10	127274714	127278408	3	189	0.031	exon	ENSMUSG00000025410	Dctn2	+
10:127274714|127278408	10	127274714	127278408	5	112	0.082	exon	ENSMUSG00000025410	Dctn2	+
10:127274714|127278408	10	127274714	127278408	8	99	0.139	exon	ENSMUSG00000025410	Dctn2	+
10:127275824|127277938	10	127275824	127277938	5	133	0.07	exon	ENSMUSG00000025410	Dctn2	+
10:127275824|127278408	10	127275824	127278408	3	122	0.047	exon	ENSMUSG00000025410	Dctn2	+
10:127275824|127278408	10	127275824	127278408	4	87	0.084	exon	ENSMUSG00000025410	Dctn2	+
10:127275824|127278408	10	127275824	127278408	5	131	0.071	exon	ENSMUSG00000025410	Dctn2	+
10:127275824|127278408	10	127275824	127278408	6	98	0.109	exon	ENSMUSG00000025410	Dctn2	+
10:127275824|127278408	10	127275824	127278408	7	109	0.114	exon	ENSMUSG00000025410	Dctn2	+
10:127390311|127400193	10	127390311	127400193	28	2	0.966	exon	ENSMUSG00000025404	R3hdm2	+
10:127390311|127400193	10	127390311	127400193	33	9	0.88	exon	ENSMUSG00000025404	R3hdm2	+
10:127390311|127400193	10	127390311	127400193	37	2	0.974	exon	ENSMUSG00000025404	R3hdm2	+
10:127390311|127400193	10	127390311	127400193	44	1	0.989	exon	ENSMUSG00000025404	R3hdm2	+
10:127390311|127400193	10	127390311	127400193	45	9	0.909	exon	ENSMUSG00000025404	R3hdm2	+
10:127390311|127400193	10	127390311	127400193	56	4	0.966	exon	ENSMUSG00000025404	R3hdm2	+
10:127390311|127444475	10	127390311	127444475	12	2	0.923	exon	ENSMUSG00000025404	R3hdm2	+
10:127390311|127444475	10	127390311	127444475	3	6	0.5	exon	ENSMUSG00000025404	R3hdm2	+
10:127390311|127444475	10	127390311	127444475	8	7	0.696	exon	ENSMUSG00000025404	R3hdm2	+
10:127483976|127485570	10	127483976	127485570	2	16	0.2	exon	ENSMUSG00000025404	R3hdm2	+
10:127541234|127542673	10	127541234	127542673	4	101	0.073	exon	ENSMUSG00000040249	Lrp1	-
10:127646891|127648189	10	127646891	127648189	10	44	0.312	exon	ENSMUSG00000002147	Stat6	+
10:127646891|127648189	10	127646891	127648189	16	54	0.372	exon	ENSMUSG00000002147	Stat6	+
10:127646891|127648189	10	127646891	127648189	16	64	0.333	exon	ENSMUSG00000002147	Stat6	+
10:127646891|127648189	10	127646891	127648189	19	65	0.369	exon	ENSMUSG00000002147	Stat6	+
10:127646891|127648189	10	127646891	127648189	20	61	0.396	exon	ENSMUSG00000002147	Stat6	+
10:127646891|127648189	10	127646891	127648189	23	88	0.343	exon	ENSMUSG00000002147	Stat6	+
10:127646891|127648189	10	127646891	127648189	4	60	0.118	exon	ENSMUSG00000002147	Stat6	+
10:127646891|127648189	10	127646891	127648189	4	59	0.119	exon	ENSMUSG00000002147	Stat6	+
10:127646891|127648189	10	127646891	127648189	8	73	0.18	exon	ENSMUSG00000002147	Stat6	+
10:127646891|127648189	10	127646891	127648189	9	70	0.205	exon	ENSMUSG00000002147	Stat6	+
10:128068786|128069214	10	128068786	128069214	6	0	1	intron	ENSMUSG00000071072	Ptges3	+
10:128137474|128138197	10	128137474	128138197	3	3	0.667	exon	ENSMUSG00000040043	Rbms2	-
10:128199182|128201369	10	128199182	128201369	6	127	0.086	exon	ENSMUSG00000044005	Gls2	+
10:128201206|128205264	10	128201206	128205264	11	136	0.139	exon	ENSMUSG00000044005	Gls2	+
10:128201206|128205264	10	128201206	128205264	12	86	0.218	exon	ENSMUSG00000044005	Gls2	+
10:128201206|128205264	10	128201206	128205264	13	131	0.166	exon	ENSMUSG00000044005	Gls2	+
10:128201206|128205264	10	128201206	128205264	13	81	0.243	exon	ENSMUSG00000044005	Gls2	+
10:128201206|128205264	10	128201206	128205264	2	128	0.03	exon	ENSMUSG00000044005	Gls2	+
10:128201206|128205264	10	128201206	128205264	3	54	0.1	exon	ENSMUSG00000044005	Gls2	+
10:128201206|128205264	10	128201206	128205264	4	78	0.093	exon	ENSMUSG00000044005	Gls2	+
10:128201206|128205264	10	128201206	128205264	4	118	0.063	exon	ENSMUSG00000044005	Gls2	+
10:128201206|128205264	10	128201206	128205264	6	171	0.066	exon	ENSMUSG00000044005	Gls2	+
10:128201206|128205264	10	128201206	128205264	7	112	0.111	exon	ENSMUSG00000044005	Gls2	+
10:128206872|128207622	10	128206872	128207622	2	74	0.051	exon	ENSMUSG00000044005	Gls2	+
10:128206872|128207622	10	128206872	128207622	3	104	0.055	exon	ENSMUSG00000044005	Gls2	+
10:128206872|128207622	10	128206872	128207622	5	71	0.123	exon	ENSMUSG00000044005	Gls2	+
10:128206872|128207622	10	128206872	128207622	8	94	0.145	exon	ENSMUSG00000044005	Gls2	+
10:128207298|128208667	10	128207298	128208667	108	142	0.603	exon	ENSMUSG00000044005	Gls2	+
10:128207298|128208667	10	128207298	128208667	109	37	0.855	exon	ENSMUSG00000044005	Gls2	+
10:128207298|128208667	10	128207298	128208667	120	59	0.803	exon	ENSMUSG00000044005	Gls2	+
10:128207298|128208667	10	128207298	128208667	152	75	0.802	exon	ENSMUSG00000044005	Gls2	+
10:128207298|128208667	10	128207298	128208667	159	54	0.855	exon	ENSMUSG00000044005	Gls2	+
10:128207298|128208667	10	128207298	128208667	174	86	0.802	exon	ENSMUSG00000044005	Gls2	+
10:128207298|128208667	10	128207298	128208667	181	67	0.844	exon	ENSMUSG00000044005	Gls2	+
10:128207298|128208667	10	128207298	128208667	184	109	0.771	exon	ENSMUSG00000044005	Gls2	+
10:128207298|128208667	10	128207298	128208667	186	134	0.735	exon	ENSMUSG00000044005	Gls2	+
10:128207298|128208667	10	128207298	128208667	188	37	0.91	exon	ENSMUSG00000044005	Gls2	+
10:128207298|128208667	10	128207298	128208667	210	80	0.84	exon	ENSMUSG00000044005	Gls2	+
10:128207298|128208667	10	128207298	128208667	242	106	0.82	exon	ENSMUSG00000044005	Gls2	+
10:128207301|128208667	10	128207301	128208667	4	109	0.068	exon	ENSMUSG00000044005	Gls2	+
10:128242310|128242718	10	128242310	128242718	12	12	0.667	exon	ENSMUSG00000039994	Timeless	+
10:128242310|128242718	10	128242310	128242718	7	0	1	exon	ENSMUSG00000039994	Timeless	+
10:128242310|128242718	10	128242310	128242718	9	0	1	exon	ENSMUSG00000039994	Timeless	+
10:128242310|128242718	10	128242310	128242718	9	5	0.783	exon	ENSMUSG00000039994	Timeless	+
10:128276486|128277218	10	128276486	128277218	2	45	0.082	exon	ENSMUSG00000040033	Stat2	+
10:128276486|128277218	10	128276486	128277218	6	24	0.333	exon	ENSMUSG00000040033	Stat2	+
10:128276486|128278817	10	128276486	128278817	5	16	0.385	exon	ENSMUSG00000040033	Stat2	+
10:128276486|128278817	10	128276486	128278817	6	5	0.706	exon	ENSMUSG00000040033	Stat2	+
10:128276486|128278817	10	128276486	128278817	7	7	0.667	exon	ENSMUSG00000040033	Stat2	+
10:128276486|128278817	10	128276486	128278817	7	13	0.519	exon	ENSMUSG00000040033	Stat2	+
10:128277644|128278817	10	128277644	128278817	11	16	0.579	exon	ENSMUSG00000040033	Stat2	+
10:128277644|128278817	10	128277644	128278817	12	20	0.545	exon	ENSMUSG00000040033	Stat2	+
10:128277644|128278817	10	128277644	128278817	14	17	0.622	exon	ENSMUSG00000040033	Stat2	+
10:128277644|128278817	10	128277644	128278817	16	7	0.821	exon	ENSMUSG00000040033	Stat2	+
10:128277644|128278817	10	128277644	128278817	17	23	0.596	exon	ENSMUSG00000040033	Stat2	+
10:128277644|128278817	10	128277644	128278817	18	17	0.679	exon	ENSMUSG00000040033	Stat2	+
10:128277644|128278817	10	128277644	128278817	18	41	0.468	exon	ENSMUSG00000040033	Stat2	+
10:128277644|128278817	10	128277644	128278817	23	23	0.667	exon	ENSMUSG00000040033	Stat2	+
10:128277644|128278817	10	128277644	128278817	24	19	0.716	exon	ENSMUSG00000040033	Stat2	+
10:128277644|128278817	10	128277644	128278817	26	18	0.743	exon	ENSMUSG00000040033	Stat2	+
10:128277644|128278817	10	128277644	128278817	28	16	0.778	exon	ENSMUSG00000040033	Stat2	+
10:128277822|128278817	10	128277822	128278817	4	42	0.16	exon	ENSMUSG00000040033	Stat2	+
10:128358334|128358533	10	128358334	128358533	12	34	0.414	exon	ENSMUSG00000005683	Cs	+
10:128358334|128358533	10	128358334	128358533	3	34	0.15	exon	ENSMUSG00000005683	Cs	+
10:128358334|128358533	10	128358334	128358533	8	15	0.516	exon	ENSMUSG00000005683	Cs	+
10:128462981|128465506	10	128462981	128465506	6	33	0.267	exon	ENSMUSG00000025369	Smarcc2	+
10:128462981|128465506	10	128462981	128465506	6	32	0.273	exon	ENSMUSG00000025369	Smarcc2	+
10:128468795|128469137	10	128468795	128469137	5	89	0.101	exon	ENSMUSG00000025369	Smarcc2	+
10:128468795|128469789	10	128468795	128469789	10	31	0.392	exon	ENSMUSG00000025369	Smarcc2	+
10:128468795|128469789	10	128468795	128469789	11	68	0.244	exon	ENSMUSG00000025369	Smarcc2	+
10:128468795|128469789	10	128468795	128469789	15	65	0.316	exon	ENSMUSG00000025369	Smarcc2	+
10:128468795|128469789	10	128468795	128469789	15	65	0.316	exon	ENSMUSG00000025369	Smarcc2	+
10:128468795|128469789	10	128468795	128469789	19	47	0.447	exon	ENSMUSG00000025369	Smarcc2	+
10:128468795|128469789	10	128468795	128469789	19	45	0.458	exon	ENSMUSG00000025369	Smarcc2	+
10:128468795|128469789	10	128468795	128469789	22	46	0.489	exon	ENSMUSG00000025369	Smarcc2	+
10:128468795|128469789	10	128468795	128469789	22	78	0.361	exon	ENSMUSG00000025369	Smarcc2	+
10:128468795|128469789	10	128468795	128469789	27	52	0.509	exon	ENSMUSG00000025369	Smarcc2	+
10:128468795|128469789	10	128468795	128469789	33	59	0.528	exon	ENSMUSG00000025369	Smarcc2	+
10:128468795|128469789	10	128468795	128469789	6	56	0.176	exon	ENSMUSG00000025369	Smarcc2	+
10:128468795|128475064	10	128468795	128475064	2	43	0.085	exon	ENSMUSG00000025369	Smarcc2	+
10:128474201|128475064	10	128474201	128475064	11	37	0.373	exon	ENSMUSG00000025369	Smarcc2	+
10:128474201|128475064	10	128474201	128475064	3	14	0.3	exon	ENSMUSG00000025369	Smarcc2	+
10:128474201|128475064	10	128474201	128475064	6	62	0.162	exon	ENSMUSG00000025369	Smarcc2	+
10:128474201|128475064	10	128474201	128475064	8	34	0.32	exon	ENSMUSG00000025369	Smarcc2	+
10:128562827|128563705	10	128562827	128563705	2	11	0.267	exon	ENSMUSG00000025364	Pa2g4	-
10:128562827|128563705	10	128562827	128563705	4	22	0.267	exon	ENSMUSG00000025364	Pa2g4	-
10:128562827|128563705	10	128562827	128563705	7	31	0.311	exon	ENSMUSG00000025364	Pa2g4	-
10:128575982|128577294	10	128575982	128577294	4	58	0.121	exon	ENSMUSG00000018166	Erbb3	-
10:128575982|128577294	10	128575982	128577294	6	48	0.2	exon	ENSMUSG00000018166	Erbb3	-
10:128575982|128579092	10	128575982	128579092	3	21	0.222	exon	ENSMUSG00000018166	Erbb3	-
10:128575982|128579092	10	128575982	128579092	5	28	0.263	exon	ENSMUSG00000018166	Erbb3	-
10:128578100|128579092	10	128578100	128579092	2	6	0.4	exon	ENSMUSG00000018166	Erbb3	-
10:128578100|128579092	10	128578100	128579092	5	19	0.345	exon	ENSMUSG00000018166	Erbb3	-
10:128578100|128579092	10	128578100	128579092	6	22	0.353	exon	ENSMUSG00000018166	Erbb3	-
10:128578100|128579092	10	128578100	128579092	6	16	0.429	exon	ENSMUSG00000018166	Erbb3	-
10:128578100|128579092	10	128578100	128579092	6	50	0.194	exon	ENSMUSG00000018166	Erbb3	-
10:128578100|128579092	10	128578100	128579092	7	16	0.467	exon	ENSMUSG00000018166	Erbb3	-
10:128578100|128579092	10	128578100	128579092	8	41	0.281	exon	ENSMUSG00000018166	Erbb3	-
10:128578100|128579092	10	128578100	128579092	9	30	0.375	exon	ENSMUSG00000018166	Erbb3	-
10:128579496|128582103	10	128579496	128582103	10	43	0.317	exon	ENSMUSG00000018166	Erbb3	-
10:128579496|128582103	10	128579496	128582103	2	25	0.138	exon	ENSMUSG00000018166	Erbb3	-
10:128579496|128582103	10	128579496	128582103	23	13	0.78	exon	ENSMUSG00000018166	Erbb3	-
10:128579496|128582103	10	128579496	128582103	3	68	0.081	exon	ENSMUSG00000018166	Erbb3	-
10:128579496|128582103	10	128579496	128582103	3	62	0.088	exon	ENSMUSG00000018166	Erbb3	-
10:128579496|128582103	10	128579496	128582103	5	14	0.417	exon	ENSMUSG00000018166	Erbb3	-
10:128579496|128582103	10	128579496	128582103	7	20	0.412	exon	ENSMUSG00000018166	Erbb3	-
10:128579496|128582103	10	128579496	128582103	9	39	0.316	exon	ENSMUSG00000018166	Erbb3	-
10:128729599|128730259	10	128729599	128730259	2	0	1	exon	ENSMUSG00000025357	Dgka	-
10:128729599|128730259	10	128729599	128730259	4	9	0.471	exon	ENSMUSG00000025357	Dgka	-
10:128814038|128814685	10	128814038	128814685	9	25	0.419	exon	ENSMUSG00000025354	Dnajc14	+
10:13224784|13234211	10	13224784	13234211	12	0	1	exon	ENSMUSG00000062866	Phactr2	-
10:13224784|13234211	10	13224784	13234211	6	10	0.545	exon	ENSMUSG00000062866	Phactr2	-
10:13224784|13239965	10	13224784	13239965	2	11	0.267	exon	ENSMUSG00000062866	Phactr2	-
10:13224784|13239965	10	13224784	13239965	2	5	0.444	exon	ENSMUSG00000062866	Phactr2	-
10:13224784|13239965	10	13224784	13239965	3	2	0.75	exon	ENSMUSG00000062866	Phactr2	-
10:13232539|13239965	10	13232539	13239965	2	4	0.5	exon	ENSMUSG00000062866	Phactr2	-
10:13239910|13247195	10	13239910	13247195	4	7	0.533	exon	ENSMUSG00000062866	Phactr2	-
10:14004201|14011215	10	14004201	14011215	6	4	0.75	intron	ENSMUSG00000015501	Hivep2	+
10:14004201|14011215	10	14004201	14011215	7	9	0.609	intron	ENSMUSG00000015501	Hivep2	+
10:14004201|14066680	10	14004201	14066680	3	12	0.333	exon	ENSMUSG00000015501	Hivep2	+
10:14004201|14066684	10	14004201	14066684	28	19	0.747	exon	ENSMUSG00000015501	Hivep2	+
10:14004201|14066684	10	14004201	14066684	38	5	0.938	exon	ENSMUSG00000015501	Hivep2	+
10:14004201|14066684	10	14004201	14066684	39	15	0.839	exon	ENSMUSG00000015501	Hivep2	+
10:14004201|14066684	10	14004201	14066684	39	10	0.886	exon	ENSMUSG00000015501	Hivep2	+
10:14004201|14066684	10	14004201	14066684	47	20	0.825	exon	ENSMUSG00000015501	Hivep2	+
10:14004201|14066684	10	14004201	14066684	68	18	0.883	exon	ENSMUSG00000015501	Hivep2	+
10:14032304|14066684	10	14032304	14066684	2	19	0.174	intron	ENSMUSG00000015501	Hivep2	+
10:14032304|14066684	10	14032304	14066684	3	16	0.273	intron	ENSMUSG00000015501	Hivep2	+
10:14032304|14066684	10	14032304	14066684	5	12	0.455	intron	ENSMUSG00000015501	Hivep2	+
10:14684064|14687708	10	14684064	14687708	6	9	0.571	exon	ENSMUSG00000019868	Vta1	-
10:18089448|18096336	10	18089448	18096336	11	1	0.957	exon	ENSMUSG00000019854	Reps1	+
10:18089448|18096336	10	18089448	18096336	14	6	0.824	exon	ENSMUSG00000019854	Reps1	+
10:18089448|18096336	10	18089448	18096336	15	2	0.938	exon	ENSMUSG00000019854	Reps1	+
10:18089448|18096336	10	18089448	18096336	16	9	0.78	exon	ENSMUSG00000019854	Reps1	+
10:18089448|18096336	10	18089448	18096336	16	10	0.762	exon	ENSMUSG00000019854	Reps1	+
10:18089448|18096336	10	18089448	18096336	18	4	0.9	exon	ENSMUSG00000019854	Reps1	+
10:18089448|18096336	10	18089448	18096336	21	1	0.977	exon	ENSMUSG00000019854	Reps1	+
10:18089448|18096336	10	18089448	18096336	28	8	0.875	exon	ENSMUSG00000019854	Reps1	+
10:18089448|18096336	10	18089448	18096336	6	1	0.923	exon	ENSMUSG00000019854	Reps1	+
10:18089448|18096336	10	18089448	18096336	6	0	1	exon	ENSMUSG00000019854	Reps1	+
10:18089448|18096336	10	18089448	18096336	8	3	0.842	exon	ENSMUSG00000019854	Reps1	+
10:18092845|18094908	10	18092845	18094908	12	17	0.585	exon	ENSMUSG00000019854	Reps1	+
10:18092845|18094908	10	18092845	18094908	12	53	0.312	exon	ENSMUSG00000019854	Reps1	+
10:18092845|18094908	10	18092845	18094908	13	49	0.347	exon	ENSMUSG00000019854	Reps1	+
10:18092845|18094908	10	18092845	18094908	15	38	0.441	exon	ENSMUSG00000019854	Reps1	+
10:18092845|18094908	10	18092845	18094908	18	30	0.545	exon	ENSMUSG00000019854	Reps1	+
10:18092845|18094908	10	18092845	18094908	20	38	0.513	exon	ENSMUSG00000019854	Reps1	+
10:18092845|18094908	10	18092845	18094908	25	32	0.61	exon	ENSMUSG00000019854	Reps1	+
10:18092845|18094908	10	18092845	18094908	30	31	0.659	exon	ENSMUSG00000019854	Reps1	+
10:18092845|18094908	10	18092845	18094908	5	27	0.27	exon	ENSMUSG00000019854	Reps1	+
10:18092845|18094908	10	18092845	18094908	6	37	0.245	exon	ENSMUSG00000019854	Reps1	+
10:18092845|18096336	10	18092845	18096336	4	44	0.154	exon	ENSMUSG00000019854	Reps1	+
10:18092845|18096336	10	18092845	18096336	5	22	0.312	exon	ENSMUSG00000019854	Reps1	+
10:18092845|18096336	10	18092845	18096336	6	30	0.286	exon	ENSMUSG00000019854	Reps1	+
10:18472919|18498157	10	18472919	18498157	13	9	0.743	exon	ENSMUSG00000039835	Nhsl1	+
10:18472919|18498157	10	18472919	18498157	5	4	0.714	exon	ENSMUSG00000039835	Nhsl1	+
10:18472919|18498157	10	18472919	18498157	8	10	0.615	exon	ENSMUSG00000039835	Nhsl1	+
10:19006863|19011790	10	19006863	19011790	4	2	0.8	exon	ENSMUSG00000019850	Tnfaip3	-
10:19884778|19894802	10	19884778	19894802	11	46	0.324	exon	ENSMUSG00000020003	Pex7	-
10:19884778|19894802	10	19884778	19894802	16	34	0.485	exon	ENSMUSG00000020003	Pex7	-
10:19884778|19894802	10	19884778	19894802	23	36	0.561	exon	ENSMUSG00000020003	Pex7	-
10:19884778|19894802	10	19884778	19894802	4	58	0.121	exon	ENSMUSG00000020003	Pex7	-
10:19884778|19894802	10	19884778	19894802	4	29	0.216	exon	ENSMUSG00000020003	Pex7	-
10:19884778|19894802	10	19884778	19894802	5	41	0.196	exon	ENSMUSG00000020003	Pex7	-
10:19884778|19894802	10	19884778	19894802	8	38	0.296	exon	ENSMUSG00000020003	Pex7	-
10:19884778|19905902	10	19884778	19905902	2	18	0.182	exon	ENSMUSG00000020003	Pex7	-
10:19884778|19905902	10	19884778	19905902	5	32	0.238	exon	ENSMUSG00000020003	Pex7	-
10:19887060|19894802	10	19887060	19894802	4	26	0.235	exon	ENSMUSG00000020003	Pex7	-
10:20000566|20029203	10	20000566	20029203	5	13	0.435	exon	ENSMUSG00000071369	Map3k5	+
10:20000566|20059090	10	20000566	20059090	4	11	0.421	exon	ENSMUSG00000071369	Map3k5	+
10:20023608|20029203	10	20023608	20029203	11	39	0.361	exon	ENSMUSG00000071369	Map3k5	+
10:20023608|20029203	10	20023608	20029203	8	12	0.571	exon	ENSMUSG00000071369	Map3k5	+
10:20023608|20067936	10	20023608	20067936	2	26	0.133	exon	ENSMUSG00000071369	Map3k5	+
10:20023608|20082468	10	20023608	20082468	6	18	0.4	exon	ENSMUSG00000071369	Map3k5	+
10:20046372|20082468	10	20046372	20082468	7	13	0.519	exon	ENSMUSG00000071369	Map3k5	+
10:20056475|20067936	10	20056475	20067936	6	26	0.316	exon	ENSMUSG00000071369	Map3k5	+
10:20058937|20079337	10	20058937	20079337	6	30	0.286	exon	ENSMUSG00000071369	Map3k5	+
10:20067829|20079337	10	20067829	20079337	2	44	0.083	exon	ENSMUSG00000071369	Map3k5	+
10:20067829|20079337	10	20067829	20079337	4	37	0.178	exon	ENSMUSG00000071369	Map3k5	+
10:20067829|20079337	10	20067829	20079337	5	16	0.385	exon	ENSMUSG00000071369	Map3k5	+
10:20067829|20082468	10	20067829	20082468	11	35	0.386	exon	ENSMUSG00000071369	Map3k5	+
10:20067829|20082468	10	20067829	20082468	14	22	0.56	exon	ENSMUSG00000071369	Map3k5	+
10:20067829|20082468	10	20067829	20082468	17	17	0.667	exon	ENSMUSG00000071369	Map3k5	+
10:20067829|20082468	10	20067829	20082468	17	12	0.739	exon	ENSMUSG00000071369	Map3k5	+
10:20067829|20082468	10	20067829	20082468	18	22	0.621	exon	ENSMUSG00000071369	Map3k5	+
10:20067829|20082468	10	20067829	20082468	21	13	0.764	exon	ENSMUSG00000071369	Map3k5	+
10:20067829|20082468	10	20067829	20082468	22	30	0.595	exon	ENSMUSG00000071369	Map3k5	+
10:20067829|20082468	10	20067829	20082468	25	7	0.877	exon	ENSMUSG00000071369	Map3k5	+
10:20067829|20082468	10	20067829	20082468	27	19	0.74	exon	ENSMUSG00000071369	Map3k5	+
10:20067829|20082468	10	20067829	20082468	32	17	0.79	exon	ENSMUSG00000071369	Map3k5	+
10:20067829|20082468	10	20067829	20082468	32	12	0.842	exon	ENSMUSG00000071369	Map3k5	+
10:20067829|20082468	10	20067829	20082468	36	20	0.783	exon	ENSMUSG00000071369	Map3k5	+
10:20067829|20094495	10	20067829	20094495	7	14	0.5	exon	ENSMUSG00000071369	Map3k5	+
10:20067829|20100197	10	20067829	20100197	6	13	0.48	exon	ENSMUSG00000071369	Map3k5	+
10:20076482|20082468	10	20076482	20082468	10	15	0.571	exon	ENSMUSG00000071369	Map3k5	+
10:20076482|20082468	10	20076482	20082468	11	17	0.564	exon	ENSMUSG00000071369	Map3k5	+
10:20076482|20082468	10	20076482	20082468	11	28	0.44	exon	ENSMUSG00000071369	Map3k5	+
10:20076482|20082468	10	20076482	20082468	13	16	0.619	exon	ENSMUSG00000071369	Map3k5	+
10:20076482|20082468	10	20076482	20082468	13	30	0.464	exon	ENSMUSG00000071369	Map3k5	+
10:20076482|20082468	10	20076482	20082468	16	30	0.516	exon	ENSMUSG00000071369	Map3k5	+
10:20076482|20082468	10	20076482	20082468	20	17	0.702	exon	ENSMUSG00000071369	Map3k5	+
10:20076482|20082468	10	20076482	20082468	22	36	0.55	exon	ENSMUSG00000071369	Map3k5	+
10:20076482|20082468	10	20076482	20082468	5	15	0.4	exon	ENSMUSG00000071369	Map3k5	+
10:20076482|20082468	10	20076482	20082468	9	23	0.439	exon	ENSMUSG00000071369	Map3k5	+
10:20099505|20100197	10	20099505	20100197	12	5	0.828	exon	ENSMUSG00000071369	Map3k5	+
10:20099505|20100197	10	20099505	20100197	4	15	0.348	exon	ENSMUSG00000071369	Map3k5	+
10:20118145|20118583	10	20118145	20118583	10	18	0.526	exon	ENSMUSG00000071369	Map3k5	+
10:20118145|20118583	10	20118145	20118583	10	39	0.339	exon	ENSMUSG00000071369	Map3k5	+
10:20118145|20118583	10	20118145	20118583	11	27	0.449	exon	ENSMUSG00000071369	Map3k5	+
10:20118145|20118583	10	20118145	20118583	3	6	0.5	exon	ENSMUSG00000071369	Map3k5	+
10:20118145|20118583	10	20118145	20118583	3	10	0.375	exon	ENSMUSG00000071369	Map3k5	+
10:20118145|20118583	10	20118145	20118583	5	11	0.476	exon	ENSMUSG00000071369	Map3k5	+
10:20118145|20118583	10	20118145	20118583	6	20	0.375	exon	ENSMUSG00000071369	Map3k5	+
10:20118145|20118583	10	20118145	20118583	7	18	0.438	exon	ENSMUSG00000071369	Map3k5	+
10:20118145|20118583	10	20118145	20118583	8	12	0.571	exon	ENSMUSG00000071369	Map3k5	+
10:20118145|20118583	10	20118145	20118583	8	9	0.64	exon	ENSMUSG00000071369	Map3k5	+
10:20124952|20132208	10	20124952	20132208	2	19	0.174	exon	ENSMUSG00000071369	Map3k5	+
10:20124952|20132208	10	20124952	20132208	5	24	0.294	exon	ENSMUSG00000071369	Map3k5	+
10:20124952|20132208	10	20124952	20132208	6	26	0.316	exon	ENSMUSG00000071369	Map3k5	+
10:20230784|20246715	10	20230784	20246715	5	19	0.345	exon	ENSMUSG00000019996	Map7	+
10:20230784|20250480	10	20230784	20250480	2	14	0.222	exon	ENSMUSG00000019996	Map7	+
10:20230784|20250480	10	20230784	20250480	3	29	0.171	exon	ENSMUSG00000019996	Map7	+
10:20230784|20250480	10	20230784	20250480	5	30	0.25	exon	ENSMUSG00000019996	Map7	+
10:20245270|20246715	10	20245270	20246715	2	34	0.105	exon	ENSMUSG00000019996	Map7	+
10:20245270|20246715	10	20245270	20246715	6	32	0.273	exon	ENSMUSG00000019996	Map7	+
10:20245270|20246715	10	20245270	20246715	8	26	0.381	exon	ENSMUSG00000019996	Map7	+
10:20245270|20250480	10	20245270	20250480	3	32	0.158	exon	ENSMUSG00000019996	Map7	+
10:20245270|20250480	10	20245270	20250480	6	64	0.158	exon	ENSMUSG00000019996	Map7	+
10:20333392|20334645	10	20333392	20334645	2	4	0.5	exon	ENSMUSG00000037608	Bclaf1	+
10:20333392|20334645	10	20333392	20334645	3	8	0.429	exon	ENSMUSG00000037608	Bclaf1	+
10:20333392|20334645	10	20333392	20334645	7	9	0.609	exon	ENSMUSG00000037608	Bclaf1	+
10:20434465|20443369	10	20434465	20443369	3	1	0.857	exon	ENSMUSG00000019990	Pde7b	-
10:20434465|20443369	10	20434465	20443369	6	2	0.857	exon	ENSMUSG00000019990	Pde7b	-
10:20979380|20988684	10	20979380	20988684	3	3	0.667	exon	ENSMUSG00000019986	Ahi1	+
10:21304530|21309093	10	21304530	21309093	5	0	1	intron	ENSMUSG00000019977	Hbs1l	+
10:21304530|21337075	10	21304530	21337075	8	24	0.4	exon	ENSMUSG00000019977	Hbs1l	+
10:21345077|21354743	10	21345077	21354743	7	23	0.378	exon	ENSMUSG00000019977	Hbs1l	+
10:21345077|21358840	10	21345077	21358840	4	22	0.267	exon	ENSMUSG00000019977	Hbs1l	+
10:21345077|21358840	10	21345077	21358840	4	22	0.267	exon	ENSMUSG00000019977	Hbs1l	+
10:21349312|21358840	10	21349312	21358840	4	20	0.286	exon	ENSMUSG00000019977	Hbs1l	+
10:23123852|23140097	10	23123852	23140097	3	0	1	exon	ENSMUSG00000010461	Eya4	-
10:23798746|23806040	10	23798746	23806040	11	0	1	exon	ENSMUSG00000037455	Slc18b1	+
10:23798746|23806040	10	23798746	23806040	4	1	0.889	exon	ENSMUSG00000037455	Slc18b1	+
10:23798746|23806040	10	23798746	23806040	4	1	0.889	exon	ENSMUSG00000037455	Slc18b1	+
10:23798746|23806040	10	23798746	23806040	4	2	0.8	exon	ENSMUSG00000037455	Slc18b1	+
10:23798746|23806040	10	23798746	23806040	5	2	0.833	exon	ENSMUSG00000037455	Slc18b1	+
10:23803758|23806040	10	23803758	23806040	7	4	0.778	exon	ENSMUSG00000037455	Slc18b1	+
10:23816293|23819161	10	23816293	23819161	3	0	1	exon	ENSMUSG00000037455	Slc18b1	+
10:23816293|23823018	10	23816293	23823018	2	2	0.667	exon	ENSMUSG00000037455	Slc18b1	+
10:24155235|24180063	10	24155235	24180063	5	23	0.303	exon	ENSMUSG00000019998	Stx7	+
10:24179117|24182841	10	24179117	24182841	12	22	0.522	exon	ENSMUSG00000019998	Stx7	+
10:24179117|24182841	10	24179117	24182841	13	50	0.342	exon	ENSMUSG00000019998	Stx7	+
10:24179117|24182841	10	24179117	24182841	4	17	0.32	exon	ENSMUSG00000019998	Stx7	+
10:24179117|24182841	10	24179117	24182841	6	20	0.375	exon	ENSMUSG00000019998	Stx7	+
10:24179117|24182841	10	24179117	24182841	7	25	0.359	exon	ENSMUSG00000019998	Stx7	+
10:24669009|24676103	10	24669009	24676103	4	6	0.571	exon	ENSMUSG00000037370	Enpp1	-
10:24777894|24787897	10	24777894	24787897	2	8	0.333	exon	ENSMUSG00000019989	Enpp3	-
10:24784790|24787897	10	24784790	24787897	15	17	0.638	exon	ENSMUSG00000019989	Enpp3	-
10:24784790|24787897	10	24784790	24787897	3	4	0.6	exon	ENSMUSG00000019989	Enpp3	-
10:24784790|24787897	10	24784790	24787897	5	13	0.435	exon	ENSMUSG00000019989	Enpp3	-
10:24784790|24787897	10	24784790	24787897	5	18	0.357	exon	ENSMUSG00000019989	Enpp3	-
10:24784790|24787897	10	24784790	24787897	6	7	0.632	exon	ENSMUSG00000019989	Enpp3	-
10:24784790|24787897	10	24784790	24787897	6	0	1	exon	ENSMUSG00000019989	Enpp3	-
10:24784790|24787897	10	24784790	24787897	7	14	0.5	exon	ENSMUSG00000019989	Enpp3	-
10:24784790|24787897	10	24784790	24787897	8	16	0.5	exon	ENSMUSG00000019989	Enpp3	-
10:24784790|24799266	10	24784790	24799266	2	3	0.571	exon	ENSMUSG00000019989	Enpp3	-
10:24804399|24808197	10	24804399	24808197	6	4	0.75	exon	ENSMUSG00000019989	Enpp3	-
10:24817867|24826298	10	24817867	24826298	10	37	0.351	exon	ENSMUSG00000019989	Enpp3	-
10:24817867|24826298	10	24817867	24826298	20	29	0.58	exon	ENSMUSG00000019989	Enpp3	-
10:24817867|24826298	10	24817867	24826298	22	66	0.4	exon	ENSMUSG00000019989	Enpp3	-
10:24817867|24826298	10	24817867	24826298	4	21	0.276	exon	ENSMUSG00000019989	Enpp3	-
10:24817867|24826298	10	24817867	24826298	5	12	0.455	exon	ENSMUSG00000019989	Enpp3	-
10:24817867|24826298	10	24817867	24826298	7	44	0.241	exon	ENSMUSG00000019989	Enpp3	-
10:24882554|24888600	10	24882554	24888600	2	3	0.571	exon	ENSMUSG00000019984	Med23	+
10:25220611|25239738	10	25220611	25239738	13	30	0.464	exon	ENSMUSG00000039166	Akap7	-
10:25220611|25239738	10	25220611	25239738	2	54	0.069	exon	ENSMUSG00000039166	Akap7	-
10:25220611|25239738	10	25220611	25239738	4	44	0.154	exon	ENSMUSG00000039166	Akap7	-
10:25220611|25239738	10	25220611	25239738	7	28	0.333	exon	ENSMUSG00000039166	Akap7	-
10:25220611|25239738	10	25220611	25239738	7	36	0.28	exon	ENSMUSG00000039166	Akap7	-
10:25220611|25271641	10	25220611	25271641	9	58	0.237	exon	ENSMUSG00000039166	Akap7	-
10:25220611|25289730	10	25220611	25289730	12	1	0.96	exon	ENSMUSG00000039166	Akap7	-
10:25220611|25289730	10	25220611	25289730	15	10	0.75	exon	ENSMUSG00000039166	Akap7	-
10:25220611|25289730	10	25220611	25289730	16	1	0.97	exon	ENSMUSG00000039166	Akap7	-
10:25220611|25289730	10	25220611	25289730	18	6	0.857	exon	ENSMUSG00000039166	Akap7	-
10:25220611|25289730	10	25220611	25289730	22	8	0.846	exon	ENSMUSG00000039166	Akap7	-
10:25220611|25289730	10	25220611	25289730	23	9	0.836	exon	ENSMUSG00000039166	Akap7	-
10:25220611|25289730	10	25220611	25289730	24	1	0.98	exon	ENSMUSG00000039166	Akap7	-
10:25220611|25289730	10	25220611	25289730	25	6	0.893	exon	ENSMUSG00000039166	Akap7	-
10:25220611|25289730	10	25220611	25289730	26	12	0.812	exon	ENSMUSG00000039166	Akap7	-
10:25220611|25289730	10	25220611	25289730	29	6	0.906	exon	ENSMUSG00000039166	Akap7	-
10:25220611|25289730	10	25220611	25289730	39	6	0.929	exon	ENSMUSG00000039166	Akap7	-
10:25220611|25289730	10	25220611	25289730	51	20	0.836	exon	ENSMUSG00000039166	Akap7	-
10:25239626|25289730	10	25239626	25289730	5	20	0.333	exon	ENSMUSG00000039166	Akap7	-
10:25239626|25289730	10	25239626	25289730	5	23	0.303	exon	ENSMUSG00000039166	Akap7	-
10:25239626|25289730	10	25239626	25289730	5	22	0.312	exon	ENSMUSG00000039166	Akap7	-
10:25267308|25271641	10	25267308	25271641	10	86	0.189	exon	ENSMUSG00000039166	Akap7	-
10:25267308|25271641	10	25267308	25271641	11	107	0.171	exon	ENSMUSG00000039166	Akap7	-
10:25267308|25271641	10	25267308	25271641	3	79	0.071	exon	ENSMUSG00000039166	Akap7	-
10:25267308|25271641	10	25267308	25271641	5	45	0.182	exon	ENSMUSG00000039166	Akap7	-
10:25267308|25271641	10	25267308	25271641	7	65	0.177	exon	ENSMUSG00000039166	Akap7	-
10:25267308|25271641	10	25267308	25271641	7	116	0.108	exon	ENSMUSG00000039166	Akap7	-
10:25267308|25271641	10	25267308	25271641	9	102	0.15	exon	ENSMUSG00000039166	Akap7	-
10:25267308|25271641	10	25267308	25271641	9	63	0.222	exon	ENSMUSG00000039166	Akap7	-
10:25267308|25284041	10	25267308	25284041	6	180	0.062	exon	ENSMUSG00000039166	Akap7	-
10:25267308|25289730	10	25267308	25289730	21	28	0.6	exon	ENSMUSG00000039166	Akap7	-
10:25267308|25289730	10	25267308	25289730	26	12	0.812	exon	ENSMUSG00000039166	Akap7	-
10:25267308|25289730	10	25267308	25289730	28	24	0.7	exon	ENSMUSG00000039166	Akap7	-
10:25267308|25289730	10	25267308	25289730	30	23	0.723	exon	ENSMUSG00000039166	Akap7	-
10:25267308|25289730	10	25267308	25289730	33	35	0.653	exon	ENSMUSG00000039166	Akap7	-
10:25267308|25289730	10	25267308	25289730	36	30	0.706	exon	ENSMUSG00000039166	Akap7	-
10:25267308|25289730	10	25267308	25289730	39	34	0.696	exon	ENSMUSG00000039166	Akap7	-
10:25267308|25289730	10	25267308	25289730	42	42	0.667	exon	ENSMUSG00000039166	Akap7	-
10:25267308|25289730	10	25267308	25289730	48	32	0.75	exon	ENSMUSG00000039166	Akap7	-
10:25267308|25289730	10	25267308	25289730	56	44	0.718	exon	ENSMUSG00000039166	Akap7	-
10:25267308|25289730	10	25267308	25289730	65	51	0.718	exon	ENSMUSG00000039166	Akap7	-
10:25267308|25289730	10	25267308	25289730	74	66	0.692	exon	ENSMUSG00000039166	Akap7	-
10:25283893|25289730	10	25283893	25289730	10	106	0.159	exon	ENSMUSG00000039166	Akap7	-
10:25283893|25289730	10	25283893	25289730	11	84	0.208	exon	ENSMUSG00000039166	Akap7	-
10:25283893|25289730	10	25283893	25289730	11	66	0.25	exon	ENSMUSG00000039166	Akap7	-
10:25283893|25289730	10	25283893	25289730	12	124	0.162	exon	ENSMUSG00000039166	Akap7	-
10:25283893|25289730	10	25283893	25289730	4	109	0.068	exon	ENSMUSG00000039166	Akap7	-
10:25283893|25289730	10	25283893	25289730	4	45	0.151	exon	ENSMUSG00000039166	Akap7	-
10:25283893|25289730	10	25283893	25289730	5	58	0.147	exon	ENSMUSG00000039166	Akap7	-
10:25283893|25289730	10	25283893	25289730	9	87	0.171	exon	ENSMUSG00000039166	Akap7	-
10:25283893|25289730	10	25283893	25289730	9	74	0.196	exon	ENSMUSG00000039166	Akap7	-
10:25283893|25289730	10	25283893	25289730	9	95	0.159	exon	ENSMUSG00000039166	Akap7	-
10:25441573|25443954	10	25441573	25443954	12	7	0.774	exon	ENSMUSG00000019978	Epb41l2	+
10:25441573|25443954	10	25441573	25443954	12	23	0.511	exon	ENSMUSG00000019978	Epb41l2	+
10:25441573|25443954	10	25441573	25443954	13	9	0.743	exon	ENSMUSG00000019978	Epb41l2	+
10:25441573|25443954	10	25441573	25443954	14	4	0.875	exon	ENSMUSG00000019978	Epb41l2	+
10:25441573|25443954	10	25441573	25443954	14	11	0.718	exon	ENSMUSG00000019978	Epb41l2	+
10:25441573|25443954	10	25441573	25443954	19	16	0.704	exon	ENSMUSG00000019978	Epb41l2	+
10:25441573|25443954	10	25441573	25443954	2	11	0.267	exon	ENSMUSG00000019978	Epb41l2	+
10:25441573|25443954	10	25441573	25443954	4	20	0.286	exon	ENSMUSG00000019978	Epb41l2	+
10:25441573|25443954	10	25441573	25443954	7	20	0.412	exon	ENSMUSG00000019978	Epb41l2	+
10:25441573|25443954	10	25441573	25443954	8	19	0.457	exon	ENSMUSG00000019978	Epb41l2	+
10:25441573|25443954	10	25441573	25443954	9	14	0.562	exon	ENSMUSG00000019978	Epb41l2	+
10:25441573|25460896	10	25441573	25460896	2	15	0.211	exon	ENSMUSG00000019978	Epb41l2	+
10:25441573|25460896	10	25441573	25460896	3	1	0.857	exon	ENSMUSG00000019978	Epb41l2	+
10:25441573|25460896	10	25441573	25460896	4	23	0.258	exon	ENSMUSG00000019978	Epb41l2	+
10:25441573|25460896	10	25441573	25460896	6	13	0.48	exon	ENSMUSG00000019978	Epb41l2	+
10:25441573|25460896	10	25441573	25460896	7	10	0.583	exon	ENSMUSG00000019978	Epb41l2	+
10:25441573|25468138	10	25441573	25468138	3	0	1	exon	ENSMUSG00000019978	Epb41l2	+
10:25460792|25473163	10	25460792	25473163	6	19	0.387	exon	ENSMUSG00000019978	Epb41l2	+
10:25501824|25502138	10	25501824	25502138	2	28	0.125	exon	ENSMUSG00000019978	Epb41l2	+
10:25501824|25502387	10	25501824	25502387	4	2	0.8	exon	ENSMUSG00000019978	Epb41l2	+
10:26313847|26318453	10	26313847	26318453	5	19	0.345	exon	ENSMUSG00000039089	L3mbtl3	-
10:26327687|26341040	10	26327687	26341040	2	31	0.114	exon	ENSMUSG00000039089	L3mbtl3	-
10:26327687|26344723	10	26327687	26344723	2	19	0.174	exon	ENSMUSG00000039089	L3mbtl3	-
10:26327687|26352375	10	26327687	26352375	11	10	0.688	exon	ENSMUSG00000039089	L3mbtl3	-
10:26327687|26352375	10	26327687	26352375	13	4	0.867	exon	ENSMUSG00000039089	L3mbtl3	-
10:26327687|26352375	10	26327687	26352375	2	8	0.333	exon	ENSMUSG00000039089	L3mbtl3	-
10:26327687|26352375	10	26327687	26352375	3	1	0.857	exon	ENSMUSG00000039089	L3mbtl3	-
10:26327687|26352375	10	26327687	26352375	6	8	0.6	exon	ENSMUSG00000039089	L3mbtl3	-
10:26327687|26352375	10	26327687	26352375	8	1	0.941	exon	ENSMUSG00000039089	L3mbtl3	-
10:26337768|26352375	10	26337768	26352375	4	18	0.308	exon	ENSMUSG00000039089	L3mbtl3	-
10:26337768|26352375	10	26337768	26352375	6	11	0.522	exon	ENSMUSG00000039089	L3mbtl3	-
10:26342508|26344723	10	26342508	26344723	4	48	0.143	exon	ENSMUSG00000039089	L3mbtl3	-
10:26877157|26880770	10	26877157	26880770	6	15	0.444	exon	ENSMUSG00000039031	Arhgap18	+
10:28263501|28354779	10	28263501	28354779	2	51	0.073	exon	ENSMUSG00000019889	Ptprk	+
10:28263501|28354779	10	28263501	28354779	6	56	0.176	exon	ENSMUSG00000019889	Ptprk	+
10:28354605|28383724	10	28354605	28383724	12	40	0.375	exon	ENSMUSG00000019889	Ptprk	+
10:28354605|28383724	10	28354605	28383724	2	23	0.148	exon	ENSMUSG00000019889	Ptprk	+
10:28354605|28383724	10	28354605	28383724	4	20	0.286	exon	ENSMUSG00000019889	Ptprk	+
10:28354605|28383724	10	28354605	28383724	5	25	0.286	exon	ENSMUSG00000019889	Ptprk	+
10:28354605|28383724	10	28354605	28383724	6	25	0.324	exon	ENSMUSG00000019889	Ptprk	+
10:28354605|28383724	10	28354605	28383724	7	41	0.255	exon	ENSMUSG00000019889	Ptprk	+
10:28354605|28383724	10	28354605	28383724	8	40	0.286	exon	ENSMUSG00000019889	Ptprk	+
10:28465758|28466060	10	28465758	28466060	2	35	0.103	exon	ENSMUSG00000019889	Ptprk	+
10:28465758|28466060	10	28465758	28466060	6	24	0.333	exon	ENSMUSG00000019889	Ptprk	+
10:28465758|28496945	10	28465758	28496945	12	41	0.369	exon	ENSMUSG00000019889	Ptprk	+
10:28465758|28496945	10	28465758	28496945	3	37	0.14	exon	ENSMUSG00000019889	Ptprk	+
10:28465758|28496945	10	28465758	28496945	6	25	0.324	exon	ENSMUSG00000019889	Ptprk	+
10:28551618|28560165	10	28551618	28560165	3	35	0.146	exon	ENSMUSG00000019889	Ptprk	+
10:28569897|28575706	10	28569897	28575706	14	27	0.509	exon	ENSMUSG00000019889	Ptprk	+
10:28569897|28575706	10	28569897	28575706	17	26	0.567	exon	ENSMUSG00000019889	Ptprk	+
10:28569897|28575706	10	28569897	28575706	28	23	0.709	exon	ENSMUSG00000019889	Ptprk	+
10:28569897|28575706	10	28569897	28575706	7	34	0.292	exon	ENSMUSG00000019889	Ptprk	+
10:28569897|28575706	10	28569897	28575706	7	21	0.4	exon	ENSMUSG00000019889	Ptprk	+
10:28569897|28575706	10	28569897	28575706	8	11	0.593	exon	ENSMUSG00000019889	Ptprk	+
10:28569897|28575706	10	28569897	28575706	9	24	0.429	exon	ENSMUSG00000019889	Ptprk	+
10:28569897|28575706	10	28569897	28575706	9	17	0.514	exon	ENSMUSG00000019889	Ptprk	+
10:28569897|28575706	10	28569897	28575706	9	40	0.31	exon	ENSMUSG00000019889	Ptprk	+
10:28580393|28586072	10	28580393	28586072	2	23	0.148	exon	ENSMUSG00000019889	Ptprk	+
10:28591885|28592905	10	28591885	28592905	2	10	0.286	exon	ENSMUSG00000019889	Ptprk	+
10:29499932|29506579	10	29499932	29506579	9	3	0.857	exon	ENSMUSG00000019880	Rspo3	-
10:30547657|30566506	10	30547657	30566506	3	6	0.5	exon	ENSMUSG00000019792	Trmt11	-
10:30547657|30566506	10	30547657	30566506	8	1	0.941	exon	ENSMUSG00000019792	Trmt11	-
10:30587439|30597805	10	30587439	30597805	2	11	0.267	exon	ENSMUSG00000019792	Trmt11	-
10:30587439|30597805	10	30587439	30597805	5	4	0.714	exon	ENSMUSG00000019792	Trmt11	-
10:30590025|30591102	10	30590025	30591102	3	1	0.857	exon	ENSMUSG00000019792	Trmt11	-
10:30590025|30591102	10	30590025	30591102	4	10	0.444	exon	ENSMUSG00000019792	Trmt11	-
10:30590025|30591102	10	30590025	30591102	4	10	0.444	exon	ENSMUSG00000019792	Trmt11	-
10:30590025|30591102	10	30590025	30591102	5	2	0.833	exon	ENSMUSG00000019792	Trmt11	-
10:30722646|30771840	10	30722646	30771840	3	0	1	exon	ENSMUSG00000039697	Ncoa7	-
10:31505773|31534896	10	31505773	31534896	23	19	0.708	exon	ENSMUSG00000063760	Rnf217	-
10:31505773|31534896	10	31505773	31534896	4	18	0.308	exon	ENSMUSG00000063760	Rnf217	-
10:31505773|31534896	10	31505773	31534896	7	12	0.538	exon	ENSMUSG00000063760	Rnf217	-
10:31505773|31534896	10	31505773	31534896	8	5	0.762	exon	ENSMUSG00000063760	Rnf217	-
10:31505773|31534896	10	31505773	31534896	9	20	0.474	exon	ENSMUSG00000063760	Rnf217	-
10:31505773|31534896	10	31505773	31534896	9	11	0.621	exon	ENSMUSG00000063760	Rnf217	-
10:31517384|31534896	10	31517384	31534896	10	34	0.37	exon	ENSMUSG00000063760	Rnf217	-
10:31517384|31534896	10	31517384	31534896	12	72	0.25	exon	ENSMUSG00000063760	Rnf217	-
10:31517384|31534896	10	31517384	31534896	13	23	0.531	exon	ENSMUSG00000063760	Rnf217	-
10:31517384|31534896	10	31517384	31534896	13	42	0.382	exon	ENSMUSG00000063760	Rnf217	-
10:31517384|31534896	10	31517384	31534896	16	43	0.427	exon	ENSMUSG00000063760	Rnf217	-
10:31517384|31534896	10	31517384	31534896	21	63	0.4	exon	ENSMUSG00000063760	Rnf217	-
10:31517384|31534896	10	31517384	31534896	23	47	0.495	exon	ENSMUSG00000063760	Rnf217	-
10:31517384|31534896	10	31517384	31534896	3	47	0.113	exon	ENSMUSG00000063760	Rnf217	-
10:31517384|31534896	10	31517384	31534896	43	51	0.628	exon	ENSMUSG00000063760	Rnf217	-
10:31517384|31534896	10	31517384	31534896	5	38	0.208	exon	ENSMUSG00000063760	Rnf217	-
10:31517384|31534896	10	31517384	31534896	6	22	0.353	exon	ENSMUSG00000063760	Rnf217	-
10:31517384|31534896	10	31517384	31534896	8	44	0.267	exon	ENSMUSG00000063760	Rnf217	-
10:31534663|31534896	10	31534663	31534896	10	32	0.385	exon	ENSMUSG00000063760	Rnf217	-
10:31534663|31534896	10	31534663	31534896	10	18	0.526	exon	ENSMUSG00000063760	Rnf217	-
10:31534663|31534896	10	31534663	31534896	12	48	0.333	exon	ENSMUSG00000063760	Rnf217	-
10:31534663|31534896	10	31534663	31534896	12	39	0.381	exon	ENSMUSG00000063760	Rnf217	-
10:31534663|31534896	10	31534663	31534896	12	43	0.358	exon	ENSMUSG00000063760	Rnf217	-
10:31534663|31534896	10	31534663	31534896	14	73	0.277	exon	ENSMUSG00000063760	Rnf217	-
10:31534663|31534896	10	31534663	31534896	15	70	0.3	exon	ENSMUSG00000063760	Rnf217	-
10:31534663|31534896	10	31534663	31534896	18	27	0.571	exon	ENSMUSG00000063760	Rnf217	-
10:31534663|31534896	10	31534663	31534896	23	77	0.374	exon	ENSMUSG00000063760	Rnf217	-
10:31534663|31534896	10	31534663	31534896	31	59	0.512	exon	ENSMUSG00000063760	Rnf217	-
10:31534663|31534896	10	31534663	31534896	6	64	0.158	exon	ENSMUSG00000063760	Rnf217	-
10:34008993|34012137	10	34008993	34012137	16	5	0.865	exon	ENSMUSG00000019782	Rwdd1	-
10:34008993|34012137	10	34008993	34012137	17	6	0.85	exon	ENSMUSG00000019782	Rwdd1	-
10:34008993|34012137	10	34008993	34012137	19	6	0.864	exon	ENSMUSG00000019782	Rwdd1	-
10:34008993|34012137	10	34008993	34012137	20	2	0.952	exon	ENSMUSG00000019782	Rwdd1	-
10:34008993|34012137	10	34008993	34012137	27	2	0.964	exon	ENSMUSG00000019782	Rwdd1	-
10:34008993|34012137	10	34008993	34012137	29	1	0.983	exon	ENSMUSG00000019782	Rwdd1	-
10:34008993|34012137	10	34008993	34012137	30	1	0.984	exon	ENSMUSG00000019782	Rwdd1	-
10:34008993|34012137	10	34008993	34012137	32	13	0.831	exon	ENSMUSG00000019782	Rwdd1	-
10:34008993|34012137	10	34008993	34012137	36	4	0.947	exon	ENSMUSG00000019782	Rwdd1	-
10:34008993|34012137	10	34008993	34012137	44	3	0.967	exon	ENSMUSG00000019782	Rwdd1	-
10:34008993|34012137	10	34008993	34012137	56	1	0.991	exon	ENSMUSG00000019782	Rwdd1	-
10:34008993|34012137	10	34008993	34012137	9	6	0.75	exon	ENSMUSG00000019782	Rwdd1	-
10:34398114|34411459	10	34398114	34411459	2	4	0.5	exon	ENSMUSG00000039480	Nt5dc1	-
10:36985127|36989288	10	36985127	36989288	3	5	0.545	exon	ENSMUSG00000019777	Hdac2	+
10:3802740|3873441	10	3802740	3873441	3	4	0.6	exon	ENSMUSG00000040624	Plekhg1	+
10:3872927|3873441	10	3872927	3873441	5	8	0.556	exon	ENSMUSG00000040624	Plekhg1	+
10:39395005|39416662	10	39395005	39416662	2	1	0.8	intron	ENSMUSG00000019843	Fyn	+
10:39395005|39455135	10	39395005	39455135	4	11	0.421	exon	ENSMUSG00000019843	Fyn	+
10:39511739|39515669	10	39511739	39515669	2	20	0.167	exon	ENSMUSG00000019843	Fyn	+
10:39639220|39641394	10	39639220	39641394	3	5	0.545	exon	ENSMUSG00000019842	Traf3ip2	+
10:39742691|39799977	10	39742691	39799977	11	0	1	exon	ENSMUSG00000019841	Rev3l	+
10:39742691|39799977	10	39742691	39799977	18	6	0.857	exon	ENSMUSG00000019841	Rev3l	+
10:39742691|39799977	10	39742691	39799977	20	10	0.8	exon	ENSMUSG00000019841	Rev3l	+
10:39742691|39799977	10	39742691	39799977	5	4	0.714	exon	ENSMUSG00000019841	Rev3l	+
10:39742691|39799977	10	39742691	39799977	8	1	0.941	exon	ENSMUSG00000019841	Rev3l	+
10:39742691|39799977	10	39742691	39799977	9	13	0.581	exon	ENSMUSG00000019841	Rev3l	+
10:39742691|39806983	10	39742691	39806983	2	8	0.333	exon	ENSMUSG00000019841	Rev3l	+
10:39783143|39799977	10	39783143	39799977	5	7	0.588	exon	ENSMUSG00000019841	Rev3l	+
10:39783143|39806983	10	39783143	39806983	5	8	0.556	exon	ENSMUSG00000019841	Rev3l	+
10:39783143|39806983	10	39783143	39806983	6	7	0.632	exon	ENSMUSG00000019841	Rev3l	+
10:39804952|39806983	10	39804952	39806983	2	11	0.267	exon	ENSMUSG00000019841	Rev3l	+
10:40076564|40080807	10	40076564	40080807	10	4	0.833	exon	ENSMUSG00000019838	Slc16a10	-
10:40076564|40080807	10	40076564	40080807	11	9	0.71	exon	ENSMUSG00000019838	Slc16a10	-
10:40076564|40080807	10	40076564	40080807	12	6	0.8	exon	ENSMUSG00000019838	Slc16a10	-
10:40076564|40080807	10	40076564	40080807	12	0	1	exon	ENSMUSG00000019838	Slc16a10	-
10:40076564|40080807	10	40076564	40080807	13	5	0.839	exon	ENSMUSG00000019838	Slc16a10	-
10:40076564|40080807	10	40076564	40080807	15	3	0.909	exon	ENSMUSG00000019838	Slc16a10	-
10:40076564|40080807	10	40076564	40080807	15	1	0.968	exon	ENSMUSG00000019838	Slc16a10	-
10:40076564|40080807	10	40076564	40080807	15	6	0.833	exon	ENSMUSG00000019838	Slc16a10	-
10:40076564|40080807	10	40076564	40080807	16	11	0.744	exon	ENSMUSG00000019838	Slc16a10	-
10:40076564|40080807	10	40076564	40080807	21	10	0.808	exon	ENSMUSG00000019838	Slc16a10	-
10:40076564|40080807	10	40076564	40080807	25	8	0.862	exon	ENSMUSG00000019838	Slc16a10	-
10:40076564|40080807	10	40076564	40080807	7	12	0.538	exon	ENSMUSG00000019838	Slc16a10	-
10:4015514|4018599	10	4015514	4018599	4	2	0.8	exon	ENSMUSG00000040675	Mthfd1l	+
10:40233108|40239787	10	40233108	40239787	13	0	1	exon	ENSMUSG00000038510	Rpf2	-
10:40254264|40254464	10	40254264	40254464	32	22	0.744	exon	ENSMUSG00000019837	Gtf3c6	-
10:40254264|40254464	10	40254264	40254464	34	37	0.648	exon	ENSMUSG00000019837	Gtf3c6	-
10:40254264|40254464	10	40254264	40254464	37	40	0.649	exon	ENSMUSG00000019837	Gtf3c6	-
10:40254264|40254464	10	40254264	40254464	40	21	0.792	exon	ENSMUSG00000019837	Gtf3c6	-
10:40254264|40254464	10	40254264	40254464	41	38	0.683	exon	ENSMUSG00000019837	Gtf3c6	-
10:40254264|40254464	10	40254264	40254464	42	16	0.84	exon	ENSMUSG00000019837	Gtf3c6	-
10:40254264|40254464	10	40254264	40254464	42	14	0.857	exon	ENSMUSG00000019837	Gtf3c6	-
10:40254264|40254464	10	40254264	40254464	47	22	0.81	exon	ENSMUSG00000019837	Gtf3c6	-
10:40254264|40254464	10	40254264	40254464	48	29	0.768	exon	ENSMUSG00000019837	Gtf3c6	-
10:40254264|40254464	10	40254264	40254464	78	41	0.792	exon	ENSMUSG00000019837	Gtf3c6	-
10:4028395|4056861	10	4028395	4056861	2	3	0.571	exon	ENSMUSG00000040675	Mthfd1l	+
10:4032232|4048268	10	4032232	4048268	7	6	0.7	exon	ENSMUSG00000040675	Mthfd1l	+
10:4041773|4056861	10	4041773	4056861	3	6	0.5	exon	ENSMUSG00000040675	Mthfd1l	+
10:4041773|4056861	10	4041773	4056861	4	17	0.32	exon	ENSMUSG00000040675	Mthfd1l	+
10:40434304|40436212	10	40434304	40436212	12	12	0.667	exon	ENSMUSG00000038481	Cdk19	+
10:40434304|40436212	10	40434304	40436212	4	5	0.615	exon	ENSMUSG00000038481	Cdk19	+
10:40434304|40436212	10	40434304	40436212	4	9	0.471	exon	ENSMUSG00000038481	Cdk19	+
10:40434304|40436212	10	40434304	40436212	4	1	0.889	exon	ENSMUSG00000038481	Cdk19	+
10:40434304|40436212	10	40434304	40436212	4	2	0.8	exon	ENSMUSG00000038481	Cdk19	+
10:40434304|40436212	10	40434304	40436212	6	5	0.706	exon	ENSMUSG00000038481	Cdk19	+
10:40466638|40469955	10	40466638	40469955	10	7	0.741	exon	ENSMUSG00000038481	Cdk19	+
10:40466638|40469955	10	40466638	40469955	14	7	0.8	exon	ENSMUSG00000038481	Cdk19	+
10:40466638|40469955	10	40466638	40469955	15	3	0.909	exon	ENSMUSG00000038481	Cdk19	+
10:40466638|40469955	10	40466638	40469955	19	7	0.844	exon	ENSMUSG00000038481	Cdk19	+
10:40466638|40469955	10	40466638	40469955	3	18	0.25	exon	ENSMUSG00000038481	Cdk19	+
10:40466638|40469955	10	40466638	40469955	3	3	0.667	exon	ENSMUSG00000038481	Cdk19	+
10:40466638|40469955	10	40466638	40469955	4	13	0.381	exon	ENSMUSG00000038481	Cdk19	+
10:40466638|40469955	10	40466638	40469955	4	13	0.381	exon	ENSMUSG00000038481	Cdk19	+
10:40466638|40469955	10	40466638	40469955	5	3	0.769	exon	ENSMUSG00000038481	Cdk19	+
10:40466638|40469955	10	40466638	40469955	7	5	0.737	exon	ENSMUSG00000038481	Cdk19	+
10:40836288|40841815	10	40836288	40841815	15	8	0.789	exon	ENSMUSG00000038446	Cdc40	-
10:40836288|40841815	10	40836288	40841815	4	1	0.889	exon	ENSMUSG00000038446	Cdc40	-
10:40841354|40843143	10	40841354	40843143	5	13	0.435	exon	ENSMUSG00000038446	Cdc40	-
10:41272958|41285699	10	41272958	41285699	2	10	0.286	exon	ENSMUSG00000038417	Fig4	-
10:41521918|41524145	10	41521918	41524145	34	39	0.636	exon	ENSMUSG00000019818	Cd164	+
10:41521918|41524145	10	41521918	41524145	68	45	0.751	exon	ENSMUSG00000019818	Cd164	+
10:41521918|41524145	10	41521918	41524145	69	45	0.754	exon	ENSMUSG00000019818	Cd164	+
10:41521918|41524145	10	41521918	41524145	70	49	0.741	exon	ENSMUSG00000019818	Cd164	+
10:41521918|41524145	10	41521918	41524145	72	63	0.696	exon	ENSMUSG00000019818	Cd164	+
10:41521918|41524145	10	41521918	41524145	74	31	0.827	exon	ENSMUSG00000019818	Cd164	+
10:41521918|41524145	10	41521918	41524145	79	52	0.752	exon	ENSMUSG00000019818	Cd164	+
10:41521918|41524145	10	41521918	41524145	80	122	0.567	exon	ENSMUSG00000019818	Cd164	+
10:41521918|41524145	10	41521918	41524145	89	47	0.791	exon	ENSMUSG00000019818	Cd164	+
10:41550722|41553568	10	41550722	41553568	3	0	1	exon	ENSMUSG00000075225	Ccdc162	-
10:41740840|41745921	10	41740840	41745921	10	2	0.909	exon	ENSMUSG00000019813	Cep57l1	-
10:41740840|41745921	10	41740840	41745921	16	0	1	exon	ENSMUSG00000019813	Cep57l1	-
10:41740840|41745921	10	41740840	41745921	2	3	0.571	exon	ENSMUSG00000019813	Cep57l1	-
10:41740840|41745921	10	41740840	41745921	3	0	1	exon	ENSMUSG00000019813	Cep57l1	-
10:41740840|41745921	10	41740840	41745921	7	3	0.824	exon	ENSMUSG00000019813	Cep57l1	-
10:41740840|41745921	10	41740840	41745921	9	2	0.9	exon	ENSMUSG00000019813	Cep57l1	-
10:41740840|41745921	10	41740840	41745921	9	7	0.72	exon	ENSMUSG00000019813	Cep57l1	-
10:41743042|41745921	10	41743042	41745921	3	4	0.6	exon	ENSMUSG00000019813	Cep57l1	-
10:41894042|41898425	10	41894042	41898425	2	5	0.444	exon	ENSMUSG00000038332	Sesn1	+
10:41894042|41898425	10	41894042	41898425	6	1	0.923	exon	ENSMUSG00000038332	Sesn1	+
10:42196466|42197901	10	42196466	42197901	3	124	0.046	exon	ENSMUSG00000048756	Foxo3	-
10:42196466|42197901	10	42196466	42197901	5	102	0.089	exon	ENSMUSG00000048756	Foxo3	-
10:42196466|42197901	10	42196466	42197901	5	65	0.133	exon	ENSMUSG00000048756	Foxo3	-
10:42196466|42197901	10	42196466	42197901	7	86	0.14	exon	ENSMUSG00000048756	Foxo3	-
10:42196466|42197901	10	42196466	42197901	9	60	0.231	exon	ENSMUSG00000048756	Foxo3	-
10:42339825|42360247	10	42339825	42360247	6	0	1	exon	ENSMUSG00000038302	Afg1l	-
10:42360165|42408749	10	42360165	42408749	2	2	0.667	intron	ENSMUSG00000038302	Afg1l	-
10:42360165|42425308	10	42360165	42425308	4	25	0.242	exon	ENSMUSG00000038302	Afg1l	-
10:42415549|42438405	10	42415549	42438405	6	17	0.414	exon	ENSMUSG00000038302	Afg1l	-
10:42415549|42454530	10	42415549	42454530	4	6	0.571	exon	ENSMUSG00000038302	Afg1l	-
10:42454307|42454530	10	42454307	42454530	6	7	0.632	exon	ENSMUSG00000038302	Afg1l	-
10:42692911|42696417	10	42692911	42696417	7	4	0.778	exon	ENSMUSG00000038280	Ostm1	+
10:42783442|42789414	10	42783442	42789414	3	63	0.087	exon	ENSMUSG00000019802	Sec63	+
10:42783442|42789414	10	42783442	42789414	5	62	0.139	exon	ENSMUSG00000019802	Sec63	+
10:42783442|42789414	10	42783442	42789414	5	73	0.12	exon	ENSMUSG00000019802	Sec63	+
10:42783442|42789414	10	42783442	42789414	6	50	0.194	exon	ENSMUSG00000019802	Sec63	+
10:42783442|42789414	10	42783442	42789414	9	39	0.316	exon	ENSMUSG00000019802	Sec63	+
10:42783442|42791291	10	42783442	42791291	12	36	0.4	exon	ENSMUSG00000019802	Sec63	+
10:42783442|42791291	10	42783442	42791291	15	37	0.448	exon	ENSMUSG00000019802	Sec63	+
10:42783442|42791291	10	42783442	42791291	17	69	0.33	exon	ENSMUSG00000019802	Sec63	+
10:42783442|42791291	10	42783442	42791291	18	32	0.529	exon	ENSMUSG00000019802	Sec63	+
10:42783442|42791291	10	42783442	42791291	18	36	0.5	exon	ENSMUSG00000019802	Sec63	+
10:42783442|42791291	10	42783442	42791291	22	56	0.44	exon	ENSMUSG00000019802	Sec63	+
10:42783442|42791291	10	42783442	42791291	27	31	0.635	exon	ENSMUSG00000019802	Sec63	+
10:42783442|42791291	10	42783442	42791291	30	31	0.659	exon	ENSMUSG00000019802	Sec63	+
10:42783442|42791291	10	42783442	42791291	31	47	0.569	exon	ENSMUSG00000019802	Sec63	+
10:42783442|42791291	10	42783442	42791291	35	46	0.603	exon	ENSMUSG00000019802	Sec63	+
10:42783442|42791291	10	42783442	42791291	36	47	0.605	exon	ENSMUSG00000019802	Sec63	+
10:42783442|42791291	10	42783442	42791291	40	31	0.721	exon	ENSMUSG00000019802	Sec63	+
10:42783442|42796264	10	42783442	42796264	4	39	0.17	exon	ENSMUSG00000019802	Sec63	+
10:42783442|42797733	10	42783442	42797733	5	32	0.238	exon	ENSMUSG00000019802	Sec63	+
10:42783442|42798855	10	42783442	42798855	10	21	0.488	exon	ENSMUSG00000019802	Sec63	+
10:42783442|42798855	10	42783442	42798855	5	35	0.222	exon	ENSMUSG00000019802	Sec63	+
10:42789300|42791291	10	42789300	42791291	14	66	0.298	exon	ENSMUSG00000019802	Sec63	+
10:42789300|42791291	10	42789300	42791291	15	78	0.278	exon	ENSMUSG00000019802	Sec63	+
10:42789300|42791291	10	42789300	42791291	20	65	0.381	exon	ENSMUSG00000019802	Sec63	+
10:42789300|42791291	10	42789300	42791291	3	81	0.069	exon	ENSMUSG00000019802	Sec63	+
10:42789300|42791291	10	42789300	42791291	4	86	0.085	exon	ENSMUSG00000019802	Sec63	+
10:42789300|42791291	10	42789300	42791291	4	59	0.119	exon	ENSMUSG00000019802	Sec63	+
10:42789300|42791291	10	42789300	42791291	6	54	0.182	exon	ENSMUSG00000019802	Sec63	+
10:42789300|42791291	10	42789300	42791291	6	61	0.164	exon	ENSMUSG00000019802	Sec63	+
10:42789300|42791291	10	42789300	42791291	7	98	0.125	exon	ENSMUSG00000019802	Sec63	+
10:42789300|42791291	10	42789300	42791291	7	81	0.147	exon	ENSMUSG00000019802	Sec63	+
10:42789300|42791291	10	42789300	42791291	9	71	0.202	exon	ENSMUSG00000019802	Sec63	+
10:42789300|42797733	10	42789300	42797733	10	76	0.208	exon	ENSMUSG00000019802	Sec63	+
10:42789300|42797733	10	42789300	42797733	10	57	0.26	exon	ENSMUSG00000019802	Sec63	+
10:42789300|42797733	10	42789300	42797733	16	60	0.348	exon	ENSMUSG00000019802	Sec63	+
10:42789300|42797733	10	42789300	42797733	18	63	0.364	exon	ENSMUSG00000019802	Sec63	+
10:42789300|42797733	10	42789300	42797733	20	43	0.482	exon	ENSMUSG00000019802	Sec63	+
10:42789300|42797733	10	42789300	42797733	26	46	0.531	exon	ENSMUSG00000019802	Sec63	+
10:42789300|42797733	10	42789300	42797733	5	53	0.159	exon	ENSMUSG00000019802	Sec63	+
10:42789300|42797733	10	42789300	42797733	7	52	0.212	exon	ENSMUSG00000019802	Sec63	+
10:42789300|42797733	10	42789300	42797733	8	34	0.32	exon	ENSMUSG00000019802	Sec63	+
10:42789300|42797733	10	42789300	42797733	8	57	0.219	exon	ENSMUSG00000019802	Sec63	+
10:42789300|42798855	10	42789300	42798855	4	56	0.125	exon	ENSMUSG00000019802	Sec63	+
10:42789300|42798855	10	42789300	42798855	6	68	0.15	exon	ENSMUSG00000019802	Sec63	+
10:42789300|42806671	10	42789300	42806671	4	45	0.151	exon	ENSMUSG00000019802	Sec63	+
10:42798747|42806671	10	42798747	42806671	10	51	0.282	exon	ENSMUSG00000019802	Sec63	+
10:42798747|42806671	10	42798747	42806671	5	36	0.217	exon	ENSMUSG00000019802	Sec63	+
10:42798747|42806671	10	42798747	42806671	8	54	0.229	exon	ENSMUSG00000019802	Sec63	+
10:42815055|42816469	10	42815055	42816469	3	114	0.05	exon	ENSMUSG00000019802	Sec63	+
10:42815055|42816469	10	42815055	42816469	3	78	0.071	exon	ENSMUSG00000019802	Sec63	+
10:42815055|42816469	10	42815055	42816469	5	83	0.108	exon	ENSMUSG00000019802	Sec63	+
10:42815055|42823979	10	42815055	42823979	2	49	0.075	exon	ENSMUSG00000019802	Sec63	+
10:42815055|42823979	10	42815055	42823979	4	62	0.114	exon	ENSMUSG00000019802	Sec63	+
10:42815055|42823979	10	42815055	42823979	7	79	0.151	exon	ENSMUSG00000019802	Sec63	+
10:42815055|42823979	10	42815055	42823979	9	137	0.116	exon	ENSMUSG00000019802	Sec63	+
10:43393871|43395692	10	43393871	43395692	13	13	0.667	exon	ENSMUSG00000038240	Pdss2	+
10:43393871|43395692	10	43393871	43395692	15	2	0.938	exon	ENSMUSG00000038240	Pdss2	+
10:43393871|43395692	10	43393871	43395692	16	12	0.727	exon	ENSMUSG00000038240	Pdss2	+
10:43393871|43395692	10	43393871	43395692	17	11	0.756	exon	ENSMUSG00000038240	Pdss2	+
10:43393871|43395692	10	43393871	43395692	19	2	0.95	exon	ENSMUSG00000038240	Pdss2	+
10:43393871|43395692	10	43393871	43395692	19	17	0.691	exon	ENSMUSG00000038240	Pdss2	+
10:43393871|43395692	10	43393871	43395692	23	13	0.78	exon	ENSMUSG00000038240	Pdss2	+
10:43393871|43395692	10	43393871	43395692	24	14	0.774	exon	ENSMUSG00000038240	Pdss2	+
10:43393871|43395692	10	43393871	43395692	25	9	0.847	exon	ENSMUSG00000038240	Pdss2	+
10:43393871|43395692	10	43393871	43395692	26	12	0.812	exon	ENSMUSG00000038240	Pdss2	+
10:43393871|43395692	10	43393871	43395692	29	17	0.773	exon	ENSMUSG00000038240	Pdss2	+
10:43393871|43395692	10	43393871	43395692	31	11	0.849	exon	ENSMUSG00000038240	Pdss2	+
10:43393871|43413547	10	43393871	43413547	12	7	0.774	exon	ENSMUSG00000038240	Pdss2	+
10:43393871|43413547	10	43393871	43413547	14	3	0.903	exon	ENSMUSG00000038240	Pdss2	+
10:43393871|43413547	10	43393871	43413547	15	5	0.857	exon	ENSMUSG00000038240	Pdss2	+
10:43393871|43413547	10	43393871	43413547	20	2	0.952	exon	ENSMUSG00000038240	Pdss2	+
10:43393871|43413547	10	43393871	43413547	3	4	0.6	exon	ENSMUSG00000038240	Pdss2	+
10:43393871|43413547	10	43393871	43413547	34	1	0.986	exon	ENSMUSG00000038240	Pdss2	+
10:43393871|43413547	10	43393871	43413547	5	2	0.833	exon	ENSMUSG00000038240	Pdss2	+
10:43921387|43936091	10	43921387	43936091	3	9	0.4	exon	ENSMUSG00000019864	Rtn4ip1	+
10:43921387|43936091	10	43921387	43936091	7	6	0.7	exon	ENSMUSG00000019864	Rtn4ip1	+
10:43928323|43936091	10	43928323	43936091	2	13	0.235	exon	ENSMUSG00000019864	Rtn4ip1	+
10:43928323|43936091	10	43928323	43936091	4	9	0.471	exon	ENSMUSG00000019864	Rtn4ip1	+
10:43964578|43966413	10	43964578	43966413	8	16	0.5	exon	ENSMUSG00000019866	Crybg1	-
10:43967465|43974020	10	43967465	43974020	3	6	0.5	exon	ENSMUSG00000019866	Crybg1	-
10:43967465|43974020	10	43967465	43974020	6	6	0.667	exon	ENSMUSG00000019866	Crybg1	-
10:43973658|43975184	10	43973658	43975184	4	4	0.667	exon	ENSMUSG00000019866	Crybg1	-
10:43986251|43992705	10	43986251	43992705	6	12	0.5	exon	ENSMUSG00000019866	Crybg1	-
10:43989094|43992705	10	43989094	43992705	10	7	0.741	exon	ENSMUSG00000019866	Crybg1	-
10:43989094|43992705	10	43989094	43992705	12	4	0.857	exon	ENSMUSG00000019866	Crybg1	-
10:43989094|43992705	10	43989094	43992705	2	4	0.5	exon	ENSMUSG00000019866	Crybg1	-
10:43989094|43992705	10	43989094	43992705	25	0	1	exon	ENSMUSG00000019866	Crybg1	-
10:43989094|43992705	10	43989094	43992705	3	8	0.429	exon	ENSMUSG00000019866	Crybg1	-
10:43989094|43992705	10	43989094	43992705	4	4	0.667	exon	ENSMUSG00000019866	Crybg1	-
10:43989094|43992705	10	43989094	43992705	5	10	0.5	exon	ENSMUSG00000019866	Crybg1	-
10:43989094|43992705	10	43989094	43992705	6	3	0.8	exon	ENSMUSG00000019866	Crybg1	-
10:4407805|4418631	10	4407805	4418631	10	3	0.87	exon	ENSMUSG00000019763	Rmnd1	-
10:4407805|4418631	10	4407805	4418631	8	0	1	exon	ENSMUSG00000019763	Rmnd1	-
10:4413309|4414643	10	4413309	4414643	5	3	0.769	exon	ENSMUSG00000019763	Rmnd1	-
10:4418259|4418631	10	4418259	4418631	3	0	1	intron	ENSMUSG00000019763;ENSMUSG00000085687	Rmnd1;Gm16153	-
10:44303567|44319554	10	44303567	44319554	2	34	0.105	exon	ENSMUSG00000038160	Atg5	+
10:44303567|44319554	10	44303567	44319554	2	42	0.087	exon	ENSMUSG00000038160	Atg5	+
10:4439492|4439736	10	4439492	4439736	2	10	0.286	exon	ENSMUSG00000061759	Armt1	+
10:45090993|45097514	10	45090993	45097514	2	17	0.19	exon	ENSMUSG00000019849	Prep	+
10:45090993|45097514	10	45090993	45097514	4	29	0.216	exon	ENSMUSG00000019849	Prep	+
10:45588380|45618629	10	45588380	45618629	4	9	0.471	exon	ENSMUSG00000038822	Hace1	+
10:45588380|45618629	10	45588380	45618629	5	1	0.909	exon	ENSMUSG00000038822	Hace1	+
10:45618498|45652738	10	45618498	45652738	8	3	0.842	exon	ENSMUSG00000038822	Hace1	+
10:45638321|45652738	10	45638321	45652738	3	4	0.6	exon	ENSMUSG00000038822	Hace1	+
10:45638321|45652738	10	45638321	45652738	7	2	0.875	exon	ENSMUSG00000038822	Hace1	+
10:45648591|45652738	10	45648591	45652738	3	1	0.857	exon	ENSMUSG00000038822	Hace1	+
10:45648591|45652738	10	45648591	45652738	3	11	0.353	exon	ENSMUSG00000038822	Hace1	+
10:45648591|45652738	10	45648591	45652738	6	10	0.545	exon	ENSMUSG00000038822	Hace1	+
10:45652588|45671526	10	45652588	45671526	2	3	0.571	exon	ENSMUSG00000038822	Hace1	+
10:4727367|4783973	10	4727367	4783973	3	17	0.261	intron	ENSMUSG00000019768	Esr1	+
10:4746617|4783973	10	4746617	4783973	4	18	0.308	exon	ENSMUSG00000019768	Esr1	+
10:4746617|4783973	10	4746617	4783973	5	21	0.323	exon	ENSMUSG00000019768	Esr1	+
10:4856858|4857193	10	4856858	4857193	2	9	0.308	exon	ENSMUSG00000019768	Esr1	+
10:4856858|4857193	10	4856858	4857193	4	11	0.421	exon	ENSMUSG00000019768	Esr1	+
10:4856858|4969292	10	4856858	4969292	2	7	0.364	exon	ENSMUSG00000019768	Esr1	+
10:50604751|50618271	10	50604751	50618271	3	0	1	exon	ENSMUSG00000038774	Ascc3	+
10:50617712|50618271	10	50617712	50618271	11	17	0.564	exon	ENSMUSG00000038774	Ascc3	+
10:50617712|50618271	10	50617712	50618271	11	8	0.733	exon	ENSMUSG00000038774	Ascc3	+
10:50617712|50618271	10	50617712	50618271	14	17	0.622	exon	ENSMUSG00000038774	Ascc3	+
10:50617712|50618271	10	50617712	50618271	15	27	0.526	exon	ENSMUSG00000038774	Ascc3	+
10:50617712|50618271	10	50617712	50618271	19	7	0.844	exon	ENSMUSG00000038774	Ascc3	+
10:50617712|50618271	10	50617712	50618271	25	10	0.833	exon	ENSMUSG00000038774	Ascc3	+
10:50617712|50618271	10	50617712	50618271	5	16	0.385	exon	ENSMUSG00000038774	Ascc3	+
10:50617712|50618271	10	50617712	50618271	6	31	0.279	exon	ENSMUSG00000038774	Ascc3	+
10:50617712|50618271	10	50617712	50618271	8	10	0.615	exon	ENSMUSG00000038774	Ascc3	+
10:50617712|50618271	10	50617712	50618271	9	33	0.353	exon	ENSMUSG00000038774	Ascc3	+
10:50617712|50660726	10	50617712	50660726	3	16	0.273	exon	ENSMUSG00000038774	Ascc3	+
10:50645663|50649933	10	50645663	50649933	3	15	0.286	exon	ENSMUSG00000038774	Ascc3	+
10:50699940|50700656	10	50699940	50700656	4	8	0.5	exon	ENSMUSG00000038774	Ascc3	+
10:50699940|50700656	10	50699940	50700656	6	8	0.6	exon	ENSMUSG00000038774	Ascc3	+
10:50699940|50700656	10	50699940	50700656	8	10	0.615	exon	ENSMUSG00000038774	Ascc3	+
10:50707663|50711044	10	50707663	50711044	4	12	0.4	exon	ENSMUSG00000038774	Ascc3	+
10:5072037|5075947	10	5072037	5075947	7	15	0.483	exon	ENSMUSG00000096054	Syne1	-
10:50728090|50735352	10	50728090	50735352	5	25	0.286	exon	ENSMUSG00000038774	Ascc3	+
10:50748806|50754122	10	50748806	50754122	10	32	0.385	exon	ENSMUSG00000038774	Ascc3	+
10:50748806|50754122	10	50748806	50754122	12	25	0.49	exon	ENSMUSG00000038774	Ascc3	+
10:50748806|50754122	10	50748806	50754122	15	35	0.462	exon	ENSMUSG00000038774	Ascc3	+
10:50748806|50754122	10	50748806	50754122	15	80	0.273	exon	ENSMUSG00000038774	Ascc3	+
10:50748806|50754122	10	50748806	50754122	4	56	0.125	exon	ENSMUSG00000038774	Ascc3	+
10:50748806|50754122	10	50748806	50754122	6	50	0.194	exon	ENSMUSG00000038774	Ascc3	+
10:50748806|50754122	10	50748806	50754122	7	47	0.23	exon	ENSMUSG00000038774	Ascc3	+
10:50748806|50754122	10	50748806	50754122	9	43	0.295	exon	ENSMUSG00000038774	Ascc3	+
10:50748806|50754122	10	50748806	50754122	9	23	0.439	exon	ENSMUSG00000038774	Ascc3	+
10:50748806|50767507	10	50748806	50767507	21	18	0.7	exon	ENSMUSG00000038774	Ascc3	+
10:50748806|50767507	10	50748806	50767507	47	39	0.707	exon	ENSMUSG00000038774	Ascc3	+
10:50748806|50767507	10	50748806	50767507	53	32	0.768	exon	ENSMUSG00000038774	Ascc3	+
10:50748806|50767507	10	50748806	50767507	58	20	0.853	exon	ENSMUSG00000038774	Ascc3	+
10:50748806|50767507	10	50748806	50767507	60	21	0.851	exon	ENSMUSG00000038774	Ascc3	+
10:50748806|50767507	10	50748806	50767507	62	25	0.832	exon	ENSMUSG00000038774	Ascc3	+
10:50748806|50767507	10	50748806	50767507	63	14	0.9	exon	ENSMUSG00000038774	Ascc3	+
10:50748806|50767507	10	50748806	50767507	71	34	0.807	exon	ENSMUSG00000038774	Ascc3	+
10:50748806|50767507	10	50748806	50767507	72	69	0.676	exon	ENSMUSG00000038774	Ascc3	+
10:50748806|50767507	10	50748806	50767507	72	20	0.878	exon	ENSMUSG00000038774	Ascc3	+
10:50748806|50767507	10	50748806	50767507	80	19	0.894	exon	ENSMUSG00000038774	Ascc3	+
10:50748806|50767507	10	50748806	50767507	90	51	0.779	exon	ENSMUSG00000038774	Ascc3	+
10:50767091|50767507	10	50767091	50767507	10	66	0.233	exon	ENSMUSG00000038774	Ascc3	+
10:50767091|50767507	10	50767091	50767507	10	74	0.213	exon	ENSMUSG00000038774	Ascc3	+
10:50767091|50767507	10	50767091	50767507	11	61	0.265	exon	ENSMUSG00000038774	Ascc3	+
10:50767091|50767507	10	50767091	50767507	14	54	0.341	exon	ENSMUSG00000038774	Ascc3	+
10:50767091|50767507	10	50767091	50767507	16	75	0.299	exon	ENSMUSG00000038774	Ascc3	+
10:50767091|50767507	10	50767091	50767507	19	41	0.481	exon	ENSMUSG00000038774	Ascc3	+
10:50767091|50767507	10	50767091	50767507	4	43	0.157	exon	ENSMUSG00000038774	Ascc3	+
10:50767091|50767507	10	50767091	50767507	5	89	0.101	exon	ENSMUSG00000038774	Ascc3	+
10:50767091|50767507	10	50767091	50767507	6	66	0.154	exon	ENSMUSG00000038774	Ascc3	+
10:50767091|50767507	10	50767091	50767507	7	65	0.177	exon	ENSMUSG00000038774	Ascc3	+
10:50767091|50767507	10	50767091	50767507	8	75	0.176	exon	ENSMUSG00000038774	Ascc3	+
10:50767091|50767507	10	50767091	50767507	9	100	0.153	exon	ENSMUSG00000038774	Ascc3	+
10:5146253|5154595	10	5146253	5154595	5	4	0.714	exon	ENSMUSG00000096054	Syne1	-
10:52261727|52290923	10	52261727	52290923	13	0	1	exon	ENSMUSG00000019891	Dcbld1	+
10:52261727|52290923	10	52261727	52290923	16	2	0.941	exon	ENSMUSG00000019891	Dcbld1	+
10:52261727|52290923	10	52261727	52290923	2	7	0.364	exon	ENSMUSG00000019891	Dcbld1	+
10:52261727|52290923	10	52261727	52290923	5	1	0.909	exon	ENSMUSG00000019891	Dcbld1	+
10:52284103|52290923	10	52284103	52290923	10	7	0.741	exon	ENSMUSG00000019891	Dcbld1	+
10:52284103|52290923	10	52284103	52290923	11	4	0.846	exon	ENSMUSG00000019891	Dcbld1	+
10:52284103|52290923	10	52284103	52290923	13	0	1	exon	ENSMUSG00000019891	Dcbld1	+
10:52284103|52290923	10	52284103	52290923	16	2	0.941	exon	ENSMUSG00000019891	Dcbld1	+
10:52284103|52290923	10	52284103	52290923	17	4	0.895	exon	ENSMUSG00000019891	Dcbld1	+
10:52284103|52290923	10	52284103	52290923	18	4	0.9	exon	ENSMUSG00000019891	Dcbld1	+
10:52284103|52290923	10	52284103	52290923	19	5	0.884	exon	ENSMUSG00000019891	Dcbld1	+
10:52284103|52290923	10	52284103	52290923	19	2	0.95	exon	ENSMUSG00000019891	Dcbld1	+
10:52284103|52290923	10	52284103	52290923	26	7	0.881	exon	ENSMUSG00000019891	Dcbld1	+
10:52284103|52290923	10	52284103	52290923	9	0	1	exon	ENSMUSG00000019891	Dcbld1	+
10:52304587|52317151	10	52304587	52317151	2	5	0.444	exon	ENSMUSG00000019891	Dcbld1	+
10:52304587|52317151	10	52304587	52317151	4	5	0.615	exon	ENSMUSG00000019891	Dcbld1	+
10:52311400|52314404	10	52311400	52314404	2	5	0.444	exon	ENSMUSG00000019891	Dcbld1	+
10:52314355|52317151	10	52314355	52317151	3	9	0.4	exon	ENSMUSG00000019891	Dcbld1	+
10:52314355|52317151	10	52314355	52317151	4	3	0.727	exon	ENSMUSG00000019891	Dcbld1	+
10:52346049|52358937	10	52346049	52358937	3	15	0.286	exon	ENSMUSG00000019861	Gopc	-
10:52349072|52353492	10	52349072	52353492	2	10	0.286	exon	ENSMUSG00000019861	Gopc	-
10:52349072|52358937	10	52349072	52358937	4	12	0.4	exon	ENSMUSG00000019861	Gopc	-
10:52429193|52430216	10	52429193	52430216	3	28	0.176	exon	ENSMUSG00000023068	Nus1	+
10:52429193|52430216	10	52429193	52430216	6	27	0.308	exon	ENSMUSG00000023068	Nus1	+
10:52429193|52430216	10	52429193	52430216	8	58	0.216	exon	ENSMUSG00000023068	Nus1	+
10:52429193|52433444	10	52429193	52433444	6	66	0.154	exon	ENSMUSG00000023068	Nus1	+
10:53281349|53283944	10	53281349	53283944	3	5	0.545	exon	ENSMUSG00000038594	Cep85l	-
10:53283837|53292375	10	53283837	53292375	3	76	0.073	exon	ENSMUSG00000038594	Cep85l	-
10:53283837|53292375	10	53283837	53292375	7	87	0.139	exon	ENSMUSG00000038594	Cep85l	-
10:53283837|53298205	10	53283837	53298205	16	13	0.711	exon	ENSMUSG00000038594	Cep85l	-
10:53291764|53292375	10	53291764	53292375	10	101	0.165	exon	ENSMUSG00000038594	Cep85l	-
10:53291764|53292375	10	53291764	53292375	18	110	0.247	exon	ENSMUSG00000038594	Cep85l	-
10:53291764|53292375	10	53291764	53292375	3	117	0.049	exon	ENSMUSG00000038594	Cep85l	-
10:53291764|53292375	10	53291764	53292375	3	80	0.07	exon	ENSMUSG00000038594	Cep85l	-
10:53291764|53292375	10	53291764	53292375	5	94	0.096	exon	ENSMUSG00000038594	Cep85l	-
10:53291764|53292375	10	53291764	53292375	6	82	0.128	exon	ENSMUSG00000038594	Cep85l	-
10:53291764|53292375	10	53291764	53292375	7	65	0.177	exon	ENSMUSG00000038594	Cep85l	-
10:53291764|53298205	10	53291764	53298205	104	5	0.977	exon	ENSMUSG00000038594	Cep85l	-
10:53291764|53298205	10	53291764	53298205	113	11	0.954	exon	ENSMUSG00000038594	Cep85l	-
10:53291764|53298205	10	53291764	53298205	133	25	0.914	exon	ENSMUSG00000038594	Cep85l	-
10:53291764|53298205	10	53291764	53298205	141	23	0.925	exon	ENSMUSG00000038594	Cep85l	-
10:53291764|53298205	10	53291764	53298205	162	17	0.95	exon	ENSMUSG00000038594	Cep85l	-
10:53291764|53298205	10	53291764	53298205	170	19	0.947	exon	ENSMUSG00000038594	Cep85l	-
10:53291764|53298205	10	53291764	53298205	183	12	0.968	exon	ENSMUSG00000038594	Cep85l	-
10:53291764|53298205	10	53291764	53298205	186	27	0.932	exon	ENSMUSG00000038594	Cep85l	-
10:53291764|53298205	10	53291764	53298205	73	10	0.936	exon	ENSMUSG00000038594	Cep85l	-
10:53291764|53298205	10	53291764	53298205	81	5	0.97	exon	ENSMUSG00000038594	Cep85l	-
10:53291764|53298205	10	53291764	53298205	88	7	0.962	exon	ENSMUSG00000038594	Cep85l	-
10:53291764|53298205	10	53291764	53298205	94	12	0.94	exon	ENSMUSG00000038594	Cep85l	-
10:53291764|53301681	10	53291764	53301681	4	8	0.5	exon	ENSMUSG00000038594	Cep85l	-
10:53292258|53298205	10	53292258	53298205	10	79	0.202	exon	ENSMUSG00000038594	Cep85l	-
10:53292258|53298205	10	53292258	53298205	3	65	0.085	exon	ENSMUSG00000038594	Cep85l	-
10:53292258|53298205	10	53292258	53298205	3	50	0.107	exon	ENSMUSG00000038594	Cep85l	-
10:53292258|53298205	10	53292258	53298205	6	70	0.146	exon	ENSMUSG00000038594	Cep85l	-
10:53292258|53298205	10	53292258	53298205	7	60	0.189	exon	ENSMUSG00000038594	Cep85l	-
10:53292258|53298205	10	53292258	53298205	8	91	0.15	exon	ENSMUSG00000038594	Cep85l	-
10:53292258|53301681	10	53292258	53301681	6	47	0.203	exon	ENSMUSG00000038594	Cep85l	-
10:53296214|53298205	10	53296214	53298205	7	22	0.389	exon	ENSMUSG00000038594	Cep85l	-
10:53301502|53319719	10	53301502	53319719	10	28	0.417	exon	ENSMUSG00000038594	Cep85l	-
10:53301502|53319719	10	53301502	53319719	2	5	0.444	exon	ENSMUSG00000038594	Cep85l	-
10:53301502|53319719	10	53301502	53319719	3	10	0.375	exon	ENSMUSG00000038594	Cep85l	-
10:53312508|53358207	10	53312508	53358207	5	20	0.333	exon	ENSMUSG00000038594	Cep85l	-
10:53348472|53349259	10	53348472	53349259	4	33	0.195	exon	ENSMUSG00000038594	Cep85l	-
10:53348472|53349259	10	53348472	53349259	7	26	0.35	exon	ENSMUSG00000038594	Cep85l	-
10:53348472|53349259	10	53348472	53349259	9	32	0.36	exon	ENSMUSG00000038594	Cep85l	-
10:53348472|53358207	10	53348472	53358207	10	21	0.488	exon	ENSMUSG00000038594	Cep85l	-
10:53348472|53358207	10	53348472	53358207	15	31	0.492	exon	ENSMUSG00000038594	Cep85l	-
10:53348472|53358207	10	53348472	53358207	15	35	0.462	exon	ENSMUSG00000038594	Cep85l	-
10:53348472|53358207	10	53348472	53358207	2	18	0.182	exon	ENSMUSG00000038594	Cep85l	-
10:53348472|53358207	10	53348472	53358207	3	18	0.25	exon	ENSMUSG00000038594	Cep85l	-
10:53348472|53358207	10	53348472	53358207	3	13	0.316	exon	ENSMUSG00000038594	Cep85l	-
10:53348472|53358207	10	53348472	53358207	4	28	0.222	exon	ENSMUSG00000038594	Cep85l	-
10:53348472|53358207	10	53348472	53358207	7	24	0.368	exon	ENSMUSG00000038594	Cep85l	-
10:53348472|53358207	10	53348472	53358207	7	24	0.368	exon	ENSMUSG00000038594	Cep85l	-
10:53348472|53358207	10	53348472	53358207	9	28	0.391	exon	ENSMUSG00000038594	Cep85l	-
10:53348472|53367435	10	53348472	53367435	2	6	0.4	exon	ENSMUSG00000038594	Cep85l	-
10:53611352|53620215	10	53611352	53620215	6	7	0.632	exon	ENSMUSG00000058298	Mcm9	-
10:53611352|53626034	10	53611352	53626034	4	0	1	exon	ENSMUSG00000058298	Mcm9	-
10:53611352|53626034	10	53611352	53626034	7	0	1	exon	ENSMUSG00000058298	Mcm9	-
10:53674566|53690148	10	53674566	53690148	5	1	0.909	exon	ENSMUSG00000019856	Fam184a	-
10:53674566|53690148	10	53674566	53690148	6	6	0.667	exon	ENSMUSG00000019856	Fam184a	-
10:53674566|53690148	10	53674566	53690148	8	0	1	exon	ENSMUSG00000019856	Fam184a	-
10:53933492|54030794	10	53933492	54030794	5	89	0.101	exon	ENSMUSG00000003746	Man1a	-
10:53933492|54030794	10	53933492	54030794	7	101	0.122	exon	ENSMUSG00000003746	Man1a	-
10:53977023|54030794	10	53977023	54030794	15	20	0.6	exon	ENSMUSG00000003746	Man1a	-
10:53977023|54030794	10	53977023	54030794	22	75	0.37	exon	ENSMUSG00000003746	Man1a	-
10:53977023|54030794	10	53977023	54030794	23	79	0.368	exon	ENSMUSG00000003746	Man1a	-
10:53977023|54030794	10	53977023	54030794	24	56	0.462	exon	ENSMUSG00000003746	Man1a	-
10:53977023|54030794	10	53977023	54030794	26	114	0.313	exon	ENSMUSG00000003746	Man1a	-
10:53977023|54030794	10	53977023	54030794	32	83	0.435	exon	ENSMUSG00000003746	Man1a	-
10:53977023|54030794	10	53977023	54030794	33	86	0.434	exon	ENSMUSG00000003746	Man1a	-
10:53977023|54030794	10	53977023	54030794	37	111	0.4	exon	ENSMUSG00000003746	Man1a	-
10:53977023|54030794	10	53977023	54030794	45	84	0.517	exon	ENSMUSG00000003746	Man1a	-
10:53977023|54030794	10	53977023	54030794	46	99	0.482	exon	ENSMUSG00000003746	Man1a	-
10:53977023|54030794	10	53977023	54030794	58	126	0.479	exon	ENSMUSG00000003746	Man1a	-
10:53977023|54030794	10	53977023	54030794	76	95	0.615	exon	ENSMUSG00000003746	Man1a	-
10:53994247|54030794	10	53994247	54030794	10	47	0.299	intron	ENSMUSG00000003746	Man1a	-
10:53994247|54030794	10	53994247	54030794	3	78	0.071	intron	ENSMUSG00000003746	Man1a	-
10:53994247|54030794	10	53994247	54030794	4	64	0.111	intron	ENSMUSG00000003746	Man1a	-
10:54014415|54030794	10	54014415	54030794	20	86	0.317	exon	ENSMUSG00000003746	Man1a	-
10:54014415|54030794	10	54014415	54030794	20	43	0.482	exon	ENSMUSG00000003746	Man1a	-
10:54014415|54030794	10	54014415	54030794	23	163	0.22	exon	ENSMUSG00000003746	Man1a	-
10:54014415|54030794	10	54014415	54030794	23	114	0.287	exon	ENSMUSG00000003746	Man1a	-
10:54014415|54030794	10	54014415	54030794	25	99	0.336	exon	ENSMUSG00000003746	Man1a	-
10:54014415|54030794	10	54014415	54030794	26	126	0.292	exon	ENSMUSG00000003746	Man1a	-
10:54014415|54030794	10	54014415	54030794	26	117	0.308	exon	ENSMUSG00000003746	Man1a	-
10:54014415|54030794	10	54014415	54030794	27	142	0.276	exon	ENSMUSG00000003746	Man1a	-
10:54014415|54030794	10	54014415	54030794	28	116	0.326	exon	ENSMUSG00000003746	Man1a	-
10:54014415|54030794	10	54014415	54030794	38	145	0.344	exon	ENSMUSG00000003746	Man1a	-
10:54014415|54030794	10	54014415	54030794	45	140	0.391	exon	ENSMUSG00000003746	Man1a	-
10:54014415|54030794	10	54014415	54030794	46	105	0.467	exon	ENSMUSG00000003746	Man1a	-
10:54025714|54030794	10	54025714	54030794	12	213	0.101	exon	ENSMUSG00000003746	Man1a	-
10:54025714|54030794	10	54025714	54030794	2	142	0.027	exon	ENSMUSG00000003746	Man1a	-
10:54025714|54030794	10	54025714	54030794	3	186	0.031	exon	ENSMUSG00000003746	Man1a	-
10:54025714|54030794	10	54025714	54030794	3	172	0.034	exon	ENSMUSG00000003746	Man1a	-
10:54025714|54030794	10	54025714	54030794	5	210	0.045	exon	ENSMUSG00000003746	Man1a	-
10:56087531|56089839	10	56087531	56089839	8	4	0.8	exon	ENSMUSG00000038122	Tbc1d32	-
10:56123511|56151853	10	56123511	56151853	10	0	1	exon	ENSMUSG00000038122	Tbc1d32	-
10:56123511|56151853	10	56123511	56151853	11	3	0.88	exon	ENSMUSG00000038122	Tbc1d32	-
10:56123511|56151853	10	56123511	56151853	12	0	1	exon	ENSMUSG00000038122	Tbc1d32	-
10:56123511|56151853	10	56123511	56151853	4	2	0.8	exon	ENSMUSG00000038122	Tbc1d32	-
10:56123511|56151853	10	56123511	56151853	5	3	0.769	exon	ENSMUSG00000038122	Tbc1d32	-
10:57495898|57502710	10	57495898	57502710	2	31	0.114	exon	ENSMUSG00000019878	Hsf2	+
10:57495898|57502710	10	57495898	57502710	5	19	0.345	exon	ENSMUSG00000019878	Hsf2	+
10:57504582|57509114	10	57504582	57509114	5	21	0.323	exon	ENSMUSG00000019878	Hsf2	+
10:58287142|58294905	10	58287142	58294905	4	6	0.571	exon	ENSMUSG00000038039	Gcc2	+
10:58287142|58294905	10	58287142	58294905	6	19	0.387	exon	ENSMUSG00000038039	Gcc2	+
10:58292565|58294905	10	58292565	58294905	7	16	0.467	exon	ENSMUSG00000038039	Gcc2	+
10:58294711|58296239	10	58294711	58296239	3	23	0.207	exon	ENSMUSG00000038039	Gcc2	+
10:58294711|58296239	10	58294711	58296239	4	11	0.421	exon	ENSMUSG00000038039	Gcc2	+
10:58410053|58412553	10	58410053	58412553	2	35	0.103	exon	ENSMUSG00000019920	Lims1	+
10:58454573|58460605	10	58454573	58460605	2	22	0.154	exon	ENSMUSG00000003226	Ranbp2	+
10:58467115|58467473	10	58467115	58467473	4	35	0.186	exon	ENSMUSG00000003226	Ranbp2	+
10:58467115|58470762	10	58467115	58470762	12	20	0.545	exon	ENSMUSG00000003226	Ranbp2	+
10:58467115|58470762	10	58467115	58470762	2	13	0.235	exon	ENSMUSG00000003226	Ranbp2	+
10:58467115|58470762	10	58467115	58470762	3	21	0.222	exon	ENSMUSG00000003226	Ranbp2	+
10:58467115|58470762	10	58467115	58470762	4	44	0.154	exon	ENSMUSG00000003226	Ranbp2	+
10:58467115|58470762	10	58467115	58470762	5	37	0.213	exon	ENSMUSG00000003226	Ranbp2	+
10:58467115|58470762	10	58467115	58470762	6	29	0.293	exon	ENSMUSG00000003226	Ranbp2	+
10:58483029|58483983	10	58483029	58483983	2	25	0.138	exon	ENSMUSG00000003226	Ranbp2	+
10:58484442|58485881	10	58484442	58485881	2	16	0.2	exon	ENSMUSG00000003226	Ranbp2	+
10:58507521|58524296	10	58507521	58524296	8	0	1	exon	ENSMUSG00000038010	Ccdc138	+
10:59166504|59178857	10	59166504	59178857	14	8	0.778	exon	ENSMUSG00000019917	44084	-
10:59166504|59178857	10	59166504	59178857	17	8	0.81	exon	ENSMUSG00000019917	44084	-
10:59166504|59178857	10	59166504	59178857	17	24	0.586	exon	ENSMUSG00000019917	44084	-
10:59166504|59178857	10	59166504	59178857	20	31	0.563	exon	ENSMUSG00000019917	44084	-
10:59166504|59178857	10	59166504	59178857	24	15	0.762	exon	ENSMUSG00000019917	44084	-
10:59166504|59178857	10	59166504	59178857	27	12	0.818	exon	ENSMUSG00000019917	44084	-
10:59166504|59178857	10	59166504	59178857	28	6	0.903	exon	ENSMUSG00000019917	44084	-
10:59166504|59178857	10	59166504	59178857	29	18	0.763	exon	ENSMUSG00000019917	44084	-
10:59166504|59178857	10	59166504	59178857	29	20	0.744	exon	ENSMUSG00000019917	44084	-
10:59166504|59178857	10	59166504	59178857	32	8	0.889	exon	ENSMUSG00000019917	44084	-
10:59166504|59178857	10	59166504	59178857	36	19	0.791	exon	ENSMUSG00000019917	44084	-
10:59166504|59183711	10	59166504	59183711	4	14	0.364	exon	ENSMUSG00000019917	44084	-
10:59166504|59192815	10	59166504	59192815	4	22	0.267	exon	ENSMUSG00000019917	44084	-
10:59192166|59192815	10	59192166	59192815	12	8	0.75	exon	ENSMUSG00000019917	44084	-
10:59192166|59192815	10	59192166	59192815	16	4	0.889	exon	ENSMUSG00000019917	44084	-
10:59192166|59192815	10	59192166	59192815	17	4	0.895	exon	ENSMUSG00000019917	44084	-
10:59192166|59192815	10	59192166	59192815	20	2	0.952	exon	ENSMUSG00000019917	44084	-
10:59192166|59192815	10	59192166	59192815	21	7	0.857	exon	ENSMUSG00000019917	44084	-
10:59192166|59192815	10	59192166	59192815	23	4	0.92	exon	ENSMUSG00000019917	44084	-
10:59192166|59192815	10	59192166	59192815	24	4	0.923	exon	ENSMUSG00000019917	44084	-
10:59192166|59192815	10	59192166	59192815	24	2	0.96	exon	ENSMUSG00000019917	44084	-
10:59192166|59192815	10	59192166	59192815	26	4	0.929	exon	ENSMUSG00000019917	44084	-
10:59192166|59192815	10	59192166	59192815	34	3	0.958	exon	ENSMUSG00000019917	44084	-
10:59192166|59192815	10	59192166	59192815	35	5	0.933	exon	ENSMUSG00000019917	44084	-
10:59192166|59192815	10	59192166	59192815	49	9	0.916	exon	ENSMUSG00000019917	44084	-
10:59361861|59369683	10	59361861	59369683	3	11	0.353	exon	ENSMUSG00000019916	P4ha1	+
10:59427944|59438915	10	59427944	59438915	4	17	0.32	exon	ENSMUSG00000009654	Oit3	-
10:59451206|59456809	10	59451206	59456809	4	20	0.286	exon	ENSMUSG00000009647	Mcu	-
10:59454946|59456809	10	59454946	59456809	8	16	0.5	exon	ENSMUSG00000009647	Mcu	-
10:59599928|59600693	10	59599928	59600693	17	3	0.919	exon	ENSMUSG00000009647	Mcu	-
10:59599928|59600693	10	59599928	59600693	19	3	0.927	exon	ENSMUSG00000009647	Mcu	-
10:59599928|59600693	10	59599928	59600693	20	1	0.976	exon	ENSMUSG00000009647	Mcu	-
10:59599928|59600693	10	59599928	59600693	21	8	0.84	exon	ENSMUSG00000009647	Mcu	-
10:59599928|59600693	10	59599928	59600693	22	1	0.978	exon	ENSMUSG00000009647	Mcu	-
10:59599928|59600693	10	59599928	59600693	3	3	0.667	exon	ENSMUSG00000009647	Mcu	-
10:59599928|59600693	10	59599928	59600693	8	5	0.762	exon	ENSMUSG00000009647	Mcu	-
10:59599928|59600693	10	59599928	59600693	8	2	0.889	exon	ENSMUSG00000009647	Mcu	-
10:59599928|59600693	10	59599928	59600693	9	7	0.72	exon	ENSMUSG00000009647	Mcu	-
10:59599928|59600693	10	59599928	59600693	9	2	0.9	exon	ENSMUSG00000009647	Mcu	-
10:59599928|59600693	10	59599928	59600693	9	6	0.75	exon	ENSMUSG00000009647	Mcu	-
10:59727957|59733157	10	59727957	59733157	6	25	0.324	exon	ENSMUSG00000020111	Micu1	+
10:59727957|59740822	10	59727957	59740822	3	37	0.14	exon	ENSMUSG00000020111	Micu1	+
10:59727957|59740822	10	59727957	59740822	5	65	0.133	exon	ENSMUSG00000020111	Micu1	+
10:60004795|60013774	10	60004795	60013774	2	7	0.364	exon	ENSMUSG00000044475	Ascc1	+
10:60004795|60013774	10	60004795	60013774	3	23	0.207	exon	ENSMUSG00000044475	Ascc1	+
10:60004795|60013774	10	60004795	60013774	4	6	0.571	exon	ENSMUSG00000044475	Ascc1	+
10:60004795|60013774	10	60004795	60013774	5	5	0.667	exon	ENSMUSG00000044475	Ascc1	+
10:60012462|60013774	10	60012462	60013774	6	0	1	exon	ENSMUSG00000044475	Ascc1	+
10:60012462|60013774	10	60012462	60013774	9	17	0.514	exon	ENSMUSG00000044475	Ascc1	+
10:60042121|60064408	10	60042121	60064408	12	14	0.632	exon	ENSMUSG00000044475	Ascc1	+
10:60042121|60064408	10	60042121	60064408	13	39	0.4	exon	ENSMUSG00000044475	Ascc1	+
10:60042121|60064408	10	60042121	60064408	14	8	0.778	exon	ENSMUSG00000044475	Ascc1	+
10:60042121|60064408	10	60042121	60064408	15	11	0.732	exon	ENSMUSG00000044475	Ascc1	+
10:60042121|60064408	10	60042121	60064408	6	0	1	exon	ENSMUSG00000044475	Ascc1	+
10:60042121|60064408	10	60042121	60064408	7	2	0.875	exon	ENSMUSG00000044475	Ascc1	+
10:60062460|60064408	10	60062460	60064408	3	6	0.5	exon	ENSMUSG00000044475	Ascc1	+
10:61224273|61225480	10	61224273	61225480	2	0	1	exon	ENSMUSG00000059901	Adamts14	-
10:61245926|61249760	10	61245926	61249760	10	0	1	exon	ENSMUSG00000059901	Adamts14	-
10:61245926|61249760	10	61245926	61249760	3	0	1	exon	ENSMUSG00000059901	Adamts14	-
10:61245926|61249760	10	61245926	61249760	5	0	1	exon	ENSMUSG00000059901	Adamts14	-
10:61482336|61548215	10	61482336	61548215	4	12	0.4	exon	ENSMUSG00000037151	Lrrc20	+
10:61527060|61548215	10	61527060	61548215	10	58	0.256	exon	ENSMUSG00000037151	Lrrc20	+
10:61527060|61548215	10	61527060	61548215	11	39	0.361	exon	ENSMUSG00000037151	Lrrc20	+
10:61527060|61548215	10	61527060	61548215	3	14	0.3	exon	ENSMUSG00000037151	Lrrc20	+
10:61527060|61548215	10	61527060	61548215	4	71	0.101	exon	ENSMUSG00000037151	Lrrc20	+
10:61527060|61548215	10	61527060	61548215	5	106	0.086	exon	ENSMUSG00000037151	Lrrc20	+
10:61660912|61663776	10	61660912	61663776	2	159	0.025	exon	ENSMUSG00000020089	Ppa1	+
10:61660912|61665466	10	61660912	61665466	14	79	0.262	exon	ENSMUSG00000020089	Ppa1	+
10:61660912|61665466	10	61660912	61665466	3	108	0.053	exon	ENSMUSG00000020089	Ppa1	+
10:61660912|61665466	10	61660912	61665466	4	193	0.04	exon	ENSMUSG00000020089	Ppa1	+
10:61660912|61665466	10	61660912	61665466	6	98	0.109	exon	ENSMUSG00000020089	Ppa1	+
10:61660912|61665466	10	61660912	61665466	7	115	0.109	exon	ENSMUSG00000020089	Ppa1	+
10:61660912|61665466	10	61660912	61665466	7	110	0.113	exon	ENSMUSG00000020089	Ppa1	+
10:61660912|61665466	10	61660912	61665466	8	144	0.1	exon	ENSMUSG00000020089	Ppa1	+
10:61660912|61665466	10	61660912	61665466	9	90	0.167	exon	ENSMUSG00000020089	Ppa1	+
10:61663690|61665466	10	61663690	61665466	2	158	0.025	exon	ENSMUSG00000020089	Ppa1	+
10:61684880|61689905	10	61684880	61689905	10	35	0.364	exon	ENSMUSG00000020088	Sar1a	+
10:61725856|61728221	10	61725856	61728221	2	17	0.19	exon	ENSMUSG00000020085	Aifm2	+
10:61725856|61728221	10	61725856	61728221	3	10	0.375	exon	ENSMUSG00000020085	Aifm2	+
10:61725856|61728221	10	61725856	61728221	5	12	0.455	exon	ENSMUSG00000020085	Aifm2	+
10:61725856|61728221	10	61725856	61728221	5	9	0.526	exon	ENSMUSG00000020085	Aifm2	+
10:61725856|61728221	10	61725856	61728221	6	18	0.4	exon	ENSMUSG00000020085	Aifm2	+
10:61866391|61870247	10	61866391	61870247	2	12	0.25	exon	ENSMUSG00000058806	Col13a1	-
10:62284279|62286652	10	62284279	62286652	2	7	0.364	exon	ENSMUSG00000037012	Hk1	-
10:62433052|62441246	10	62433052	62441246	9	9	0.667	exon	ENSMUSG00000020079	Supv3l1	-
10:62435459|62441246	10	62435459	62441246	3	14	0.3	exon	ENSMUSG00000020079	Supv3l1	-
10:62437434|62441246	10	62437434	62441246	17	20	0.63	exon	ENSMUSG00000020079	Supv3l1	-
10:62437434|62441246	10	62437434	62441246	18	15	0.706	exon	ENSMUSG00000020079	Supv3l1	-
10:62437434|62441246	10	62437434	62441246	18	6	0.857	exon	ENSMUSG00000020079	Supv3l1	-
10:62437434|62441246	10	62437434	62441246	20	10	0.8	exon	ENSMUSG00000020079	Supv3l1	-
10:62437434|62441246	10	62437434	62441246	24	1	0.98	exon	ENSMUSG00000020079	Supv3l1	-
10:62437434|62441246	10	62437434	62441246	24	9	0.842	exon	ENSMUSG00000020079	Supv3l1	-
10:62437434|62441246	10	62437434	62441246	26	0	1	exon	ENSMUSG00000020079	Supv3l1	-
10:62437434|62441246	10	62437434	62441246	27	7	0.885	exon	ENSMUSG00000020079	Supv3l1	-
10:62441135|62447773	10	62441135	62447773	3	20	0.231	exon	ENSMUSG00000020079	Supv3l1	-
10:62441135|62447773	10	62441135	62447773	3	9	0.4	exon	ENSMUSG00000020079	Supv3l1	-
10:62447024|62447773	10	62447024	62447773	10	6	0.769	exon	ENSMUSG00000020079	Supv3l1	-
10:62447024|62447773	10	62447024	62447773	11	13	0.629	exon	ENSMUSG00000020079	Supv3l1	-
10:62447024|62447773	10	62447024	62447773	24	2	0.96	exon	ENSMUSG00000020079	Supv3l1	-
10:62447024|62447773	10	62447024	62447773	26	10	0.839	exon	ENSMUSG00000020079	Supv3l1	-
10:62447024|62447773	10	62447024	62447773	27	16	0.771	exon	ENSMUSG00000020079	Supv3l1	-
10:62447024|62447773	10	62447024	62447773	4	13	0.381	exon	ENSMUSG00000020079	Supv3l1	-
10:62468290|62471135	10	62468290	62471135	8	21	0.432	exon	ENSMUSG00000020078	Vps26a	-
10:62619585|62627682	10	62619585	62627682	7	0	1	exon	ENSMUSG00000020076	Ddx50	-
10:62633977|62643372	10	62633977	62643372	2	4	0.5	exon	ENSMUSG00000020076	Ddx50	-
10:62633977|62643372	10	62633977	62643372	3	4	0.6	exon	ENSMUSG00000020076	Ddx50	-
10:62633977|62643372	10	62633977	62643372	4	7	0.533	exon	ENSMUSG00000020076	Ddx50	-
10:62633977|62643372	10	62633977	62643372	9	4	0.818	exon	ENSMUSG00000020076	Ddx50	-
10:62639861|62640862	10	62639861	62640862	3	1	0.857	exon	ENSMUSG00000020076	Ddx50	-
10:62639861|62643372	10	62639861	62643372	3	5	0.545	exon	ENSMUSG00000020076	Ddx50	-
10:62642037|62643372	10	62642037	62643372	5	2	0.833	intron	ENSMUSG00000020076	Ddx50	-
10:62745263|62747086	10	62745263	62747086	4	18	0.308	exon	ENSMUSG00000020074	Ccar1	-
10:62746901|62747464	10	62746901	62747464	5	3	0.769	exon	ENSMUSG00000020074	Ccar1	-
10:62746901|62747464	10	62746901	62747464	9	8	0.692	exon	ENSMUSG00000020074	Ccar1	-
10:62747344|62751016	10	62747344	62751016	2	20	0.167	exon	ENSMUSG00000020074	Ccar1	-
10:62747344|62751016	10	62747344	62751016	9	14	0.562	exon	ENSMUSG00000020074	Ccar1	-
10:62750547|62751016	10	62750547	62751016	13	5	0.839	exon	ENSMUSG00000020074	Ccar1	-
10:62750547|62751016	10	62750547	62751016	16	12	0.727	exon	ENSMUSG00000020074	Ccar1	-
10:62750547|62751016	10	62750547	62751016	19	6	0.864	exon	ENSMUSG00000020074	Ccar1	-
10:62750547|62751016	10	62750547	62751016	21	8	0.84	exon	ENSMUSG00000020074	Ccar1	-
10:62750547|62751016	10	62750547	62751016	26	13	0.8	exon	ENSMUSG00000020074	Ccar1	-
10:62750547|62751016	10	62750547	62751016	6	5	0.706	exon	ENSMUSG00000020074	Ccar1	-
10:62750547|62751016	10	62750547	62751016	9	2	0.9	exon	ENSMUSG00000020074	Ccar1	-
10:62760094|62760279	10	62760094	62760279	14	5	0.848	exon	ENSMUSG00000020074	Ccar1	-
10:62760094|62760279	10	62760094	62760279	17	17	0.667	exon	ENSMUSG00000020074	Ccar1	-
10:62760094|62760279	10	62760094	62760279	20	2	0.952	exon	ENSMUSG00000020074	Ccar1	-
10:62760094|62760279	10	62760094	62760279	21	18	0.7	exon	ENSMUSG00000020074	Ccar1	-
10:62760094|62760279	10	62760094	62760279	7	7	0.667	exon	ENSMUSG00000020074	Ccar1	-
10:62760094|62760279	10	62760094	62760279	9	5	0.783	exon	ENSMUSG00000020074	Ccar1	-
10:62763440|62766782	10	62763440	62766782	2	7	0.364	exon	ENSMUSG00000020074	Ccar1	-
10:62763440|62766782	10	62763440	62766782	3	8	0.429	exon	ENSMUSG00000020074	Ccar1	-
10:62763440|62766782	10	62763440	62766782	5	23	0.303	exon	ENSMUSG00000020074	Ccar1	-
10:62763440|62766782	10	62763440	62766782	7	5	0.737	exon	ENSMUSG00000020074	Ccar1	-
10:62770855|62772065	10	62770855	62772065	33	16	0.805	exon	ENSMUSG00000020074	Ccar1	-
10:62770855|62772065	10	62770855	62772065	34	15	0.819	exon	ENSMUSG00000020074	Ccar1	-
10:62770855|62772065	10	62770855	62772065	37	4	0.949	exon	ENSMUSG00000020074	Ccar1	-
10:62770855|62772065	10	62770855	62772065	37	3	0.961	exon	ENSMUSG00000020074	Ccar1	-
10:62770855|62772065	10	62770855	62772065	39	8	0.907	exon	ENSMUSG00000020074	Ccar1	-
10:62770855|62772065	10	62770855	62772065	49	23	0.81	exon	ENSMUSG00000020074	Ccar1	-
10:62770855|62772065	10	62770855	62772065	53	7	0.938	exon	ENSMUSG00000020074	Ccar1	-
10:62770855|62772065	10	62770855	62772065	54	39	0.735	exon	ENSMUSG00000020074	Ccar1	-
10:62770855|62772065	10	62770855	62772065	57	13	0.898	exon	ENSMUSG00000020074	Ccar1	-
10:62770855|62772065	10	62770855	62772065	64	31	0.805	exon	ENSMUSG00000020074	Ccar1	-
10:62770855|62772065	10	62770855	62772065	66	27	0.83	exon	ENSMUSG00000020074	Ccar1	-
10:62770855|62772065	10	62770855	62772065	69	14	0.908	exon	ENSMUSG00000020074	Ccar1	-
10:62770855|62776963	10	62770855	62776963	5	7	0.588	exon	ENSMUSG00000020074	Ccar1	-
10:62776568|62776963	10	62776568	62776963	24	29	0.623	exon	ENSMUSG00000020074	Ccar1	-
10:62776568|62776963	10	62776568	62776963	26	19	0.732	exon	ENSMUSG00000020074	Ccar1	-
10:62776568|62776963	10	62776568	62776963	31	12	0.838	exon	ENSMUSG00000020074	Ccar1	-
10:62776568|62776963	10	62776568	62776963	35	23	0.753	exon	ENSMUSG00000020074	Ccar1	-
10:62776568|62776963	10	62776568	62776963	37	16	0.822	exon	ENSMUSG00000020074	Ccar1	-
10:62776568|62776963	10	62776568	62776963	37	15	0.831	exon	ENSMUSG00000020074	Ccar1	-
10:62776568|62776963	10	62776568	62776963	37	23	0.763	exon	ENSMUSG00000020074	Ccar1	-
10:62776568|62776963	10	62776568	62776963	41	7	0.921	exon	ENSMUSG00000020074	Ccar1	-
10:62776568|62776963	10	62776568	62776963	41	15	0.845	exon	ENSMUSG00000020074	Ccar1	-
10:62776568|62776963	10	62776568	62776963	46	13	0.876	exon	ENSMUSG00000020074	Ccar1	-
10:62776568|62776963	10	62776568	62776963	57	29	0.797	exon	ENSMUSG00000020074	Ccar1	-
10:62776568|62776963	10	62776568	62776963	68	4	0.971	exon	ENSMUSG00000020074	Ccar1	-
10:62776568|62783927	10	62776568	62783927	4	27	0.229	exon	ENSMUSG00000020074	Ccar1	-
10:62776568|62785594	10	62776568	62785594	2	25	0.138	exon	ENSMUSG00000020074	Ccar1	-
10:62776568|62785594	10	62776568	62785594	4	16	0.333	exon	ENSMUSG00000020074	Ccar1	-
10:62776568|62785594	10	62776568	62785594	6	28	0.3	exon	ENSMUSG00000020074	Ccar1	-
10:62776568|62785594	10	62776568	62785594	8	40	0.286	exon	ENSMUSG00000020074	Ccar1	-
10:62780441|62785594	10	62780441	62785594	10	27	0.426	exon	ENSMUSG00000020074	Ccar1	-
10:62780441|62785594	10	62780441	62785594	15	16	0.652	exon	ENSMUSG00000020074	Ccar1	-
10:62780441|62785594	10	62780441	62785594	17	22	0.607	exon	ENSMUSG00000020074	Ccar1	-
10:62780441|62785594	10	62780441	62785594	20	21	0.656	exon	ENSMUSG00000020074	Ccar1	-
10:62780441|62785594	10	62780441	62785594	3	19	0.24	exon	ENSMUSG00000020074	Ccar1	-
10:62780441|62785594	10	62780441	62785594	3	37	0.14	exon	ENSMUSG00000020074	Ccar1	-
10:62780441|62785594	10	62780441	62785594	6	33	0.267	exon	ENSMUSG00000020074	Ccar1	-
10:62780441|62785594	10	62780441	62785594	6	27	0.308	exon	ENSMUSG00000020074	Ccar1	-
10:62780441|62785594	10	62780441	62785594	8	24	0.4	exon	ENSMUSG00000020074	Ccar1	-
10:62780441|62785594	10	62780441	62785594	9	31	0.367	exon	ENSMUSG00000020074	Ccar1	-
10:62780441|62791042	10	62780441	62791042	2	20	0.167	exon	ENSMUSG00000020074	Ccar1	-
10:62780441|62791042	10	62780441	62791042	2	16	0.2	exon	ENSMUSG00000020074	Ccar1	-
10:62780441|62791042	10	62780441	62791042	4	10	0.444	exon	ENSMUSG00000020074	Ccar1	-
10:62780441|62791042	10	62780441	62791042	6	18	0.4	exon	ENSMUSG00000020074	Ccar1	-
10:62780441|62791042	10	62780441	62791042	6	20	0.375	exon	ENSMUSG00000020074	Ccar1	-
10:62783234|62785594	10	62783234	62785594	3	30	0.167	exon	ENSMUSG00000020074	Ccar1	-
10:62783234|62785594	10	62783234	62785594	5	21	0.323	exon	ENSMUSG00000020074	Ccar1	-
10:62783883|62785594	10	62783883	62785594	5	34	0.227	exon	ENSMUSG00000020074	Ccar1	-
10:62785431|62791042	10	62785431	62791042	2	22	0.154	exon	ENSMUSG00000020074	Ccar1	-
10:62785431|62791042	10	62785431	62791042	2	19	0.174	exon	ENSMUSG00000020074	Ccar1	-
10:62785431|62791042	10	62785431	62791042	3	30	0.167	exon	ENSMUSG00000020074	Ccar1	-
10:62785431|62791042	10	62785431	62791042	6	33	0.267	exon	ENSMUSG00000020074	Ccar1	-
10:63015802|63017610	10	63015802	63017610	3	16	0.273	exon	ENSMUSG00000020069	Hnrnph3	-
10:63015802|63019527	10	63015802	63019527	2	2	0.667	exon	ENSMUSG00000020069	Hnrnph3	-
10:63264026|63269704	10	63264026	63269704	6	17	0.414	exon	ENSMUSG00000020064	Herc4	+
10:63264026|63283341	10	63264026	63283341	3	24	0.2	exon	ENSMUSG00000020064	Herc4	+
10:63269628|63278465	10	63269628	63278465	3	8	0.429	exon	ENSMUSG00000020064	Herc4	+
10:63269628|63283341	10	63269628	63283341	5	32	0.238	exon	ENSMUSG00000020064	Herc4	+
10:63286017|63287578	10	63286017	63287578	5	37	0.213	exon	ENSMUSG00000020064	Herc4	+
10:63287519|63288009	10	63287519	63288009	2	25	0.138	exon	ENSMUSG00000020064	Herc4	+
10:63287519|63288009	10	63287519	63288009	4	23	0.258	exon	ENSMUSG00000020064	Herc4	+
10:63287519|63288009	10	63287519	63288009	7	19	0.424	exon	ENSMUSG00000020064	Herc4	+
10:63287519|63288009	10	63287519	63288009	7	19	0.424	exon	ENSMUSG00000020064	Herc4	+
10:63287519|63288009	10	63287519	63288009	9	16	0.529	exon	ENSMUSG00000020064	Herc4	+
10:63289052|63299239	10	63289052	63299239	10	14	0.588	exon	ENSMUSG00000020064	Herc4	+
10:63289052|63299239	10	63289052	63299239	11	27	0.449	exon	ENSMUSG00000020064	Herc4	+
10:63289052|63299239	10	63289052	63299239	12	48	0.333	exon	ENSMUSG00000020064	Herc4	+
10:63289052|63299239	10	63289052	63299239	13	12	0.684	exon	ENSMUSG00000020064	Herc4	+
10:63289052|63299239	10	63289052	63299239	17	19	0.642	exon	ENSMUSG00000020064	Herc4	+
10:63289052|63299239	10	63289052	63299239	3	34	0.15	exon	ENSMUSG00000020064	Herc4	+
10:63289052|63299239	10	63289052	63299239	4	19	0.296	exon	ENSMUSG00000020064	Herc4	+
10:63289052|63299239	10	63289052	63299239	5	34	0.227	exon	ENSMUSG00000020064	Herc4	+
10:63289052|63299239	10	63289052	63299239	8	17	0.485	exon	ENSMUSG00000020064	Herc4	+
10:63289052|63299239	10	63289052	63299239	9	19	0.486	exon	ENSMUSG00000020064	Herc4	+
10:63289052|63299239	10	63289052	63299239	9	36	0.333	exon	ENSMUSG00000020064	Herc4	+
10:63289143|63299239	10	63289143	63299239	2	20	0.167	exon	ENSMUSG00000020064	Herc4	+
10:63290504|63299239	10	63290504	63299239	9	47	0.277	exon	ENSMUSG00000020064	Herc4	+
10:63306348|63307909	10	63306348	63307909	3	19	0.24	exon	ENSMUSG00000020064	Herc4	+
10:63306348|63307909	10	63306348	63307909	5	13	0.435	exon	ENSMUSG00000020064	Herc4	+
10:63306348|63308450	10	63306348	63308450	2	17	0.19	exon	ENSMUSG00000020064	Herc4	+
10:63306348|63308450	10	63306348	63308450	5	22	0.312	exon	ENSMUSG00000020064	Herc4	+
10:63306348|63308450	10	63306348	63308450	6	17	0.414	exon	ENSMUSG00000020064	Herc4	+
10:63306348|63311914	10	63306348	63311914	8	3	0.842	exon	ENSMUSG00000020064	Herc4	+
10:63323967|63331897	10	63323967	63331897	8	9	0.64	exon	ENSMUSG00000020063	Sirt1	-
10:63325126|63335877	10	63325126	63335877	3	1	0.857	exon	ENSMUSG00000020063	Sirt1	-
10:63326660|63331897	10	63326660	63331897	4	1	0.889	exon	ENSMUSG00000020063	Sirt1	-
10:63331745|63335877	10	63331745	63335877	2	10	0.286	exon	ENSMUSG00000020063	Sirt1	-
10:63331745|63335877	10	63331745	63335877	2	3	0.571	exon	ENSMUSG00000020063	Sirt1	-
10:67034599|67036005	10	67034599	67036005	12	58	0.293	exon	ENSMUSG00000019873	Reep3	-
10:67034599|67036005	10	67034599	67036005	13	42	0.382	exon	ENSMUSG00000019873	Reep3	-
10:67034599|67036005	10	67034599	67036005	14	16	0.636	exon	ENSMUSG00000019873	Reep3	-
10:67034599|67036005	10	67034599	67036005	15	70	0.3	exon	ENSMUSG00000019873	Reep3	-
10:67034599|67036005	10	67034599	67036005	16	87	0.269	exon	ENSMUSG00000019873	Reep3	-
10:67034599|67036005	10	67034599	67036005	18	103	0.259	exon	ENSMUSG00000019873	Reep3	-
10:67034599|67036005	10	67034599	67036005	20	74	0.351	exon	ENSMUSG00000019873	Reep3	-
10:67034599|67036005	10	67034599	67036005	26	49	0.515	exon	ENSMUSG00000019873	Reep3	-
10:67034599|67036005	10	67034599	67036005	30	70	0.462	exon	ENSMUSG00000019873	Reep3	-
10:67034599|67036005	10	67034599	67036005	30	76	0.441	exon	ENSMUSG00000019873	Reep3	-
10:67034599|67036005	10	67034599	67036005	31	74	0.456	exon	ENSMUSG00000019873	Reep3	-
10:67034599|67039577	10	67034599	67039577	10	45	0.308	exon	ENSMUSG00000019873	Reep3	-
10:67034599|67039577	10	67034599	67039577	16	54	0.372	exon	ENSMUSG00000019873	Reep3	-
10:67034599|67039577	10	67034599	67039577	16	101	0.241	exon	ENSMUSG00000019873	Reep3	-
10:67034599|67039577	10	67034599	67039577	25	62	0.446	exon	ENSMUSG00000019873	Reep3	-
10:67034599|67039577	10	67034599	67039577	3	69	0.08	exon	ENSMUSG00000019873	Reep3	-
10:67034599|67039577	10	67034599	67039577	4	67	0.107	exon	ENSMUSG00000019873	Reep3	-
10:67034599|67039577	10	67034599	67039577	4	43	0.157	exon	ENSMUSG00000019873	Reep3	-
10:67034599|67039577	10	67034599	67039577	7	28	0.333	exon	ENSMUSG00000019873	Reep3	-
10:67034599|67039577	10	67034599	67039577	9	35	0.34	exon	ENSMUSG00000019873	Reep3	-
10:67034599|67039577	10	67034599	67039577	9	65	0.217	exon	ENSMUSG00000019873	Reep3	-
10:67034599|67063071	10	67034599	67063071	5	80	0.111	exon	ENSMUSG00000019873	Reep3	-
10:67034599|67063071	10	67034599	67063071	7	29	0.326	exon	ENSMUSG00000019873	Reep3	-
10:67035885|67039577	10	67035885	67039577	2	71	0.053	exon	ENSMUSG00000019873	Reep3	-
10:67035885|67039577	10	67035885	67039577	8	30	0.348	exon	ENSMUSG00000019873	Reep3	-
10:67157907|67158071	10	67157907	67158071	10	32	0.385	exon	ENSMUSG00000037876	Jmjd1c	+
10:67157907|67158071	10	67157907	67158071	11	16	0.579	exon	ENSMUSG00000037876	Jmjd1c	+
10:67157907|67158071	10	67157907	67158071	11	36	0.379	exon	ENSMUSG00000037876	Jmjd1c	+
10:67157907|67158071	10	67157907	67158071	16	20	0.615	exon	ENSMUSG00000037876	Jmjd1c	+
10:67157907|67158071	10	67157907	67158071	17	35	0.493	exon	ENSMUSG00000037876	Jmjd1c	+
10:67157907|67158071	10	67157907	67158071	18	35	0.507	exon	ENSMUSG00000037876	Jmjd1c	+
10:67157907|67158071	10	67157907	67158071	18	29	0.554	exon	ENSMUSG00000037876	Jmjd1c	+
10:67157907|67158071	10	67157907	67158071	19	23	0.623	exon	ENSMUSG00000037876	Jmjd1c	+
10:67157907|67158071	10	67157907	67158071	3	22	0.214	exon	ENSMUSG00000037876	Jmjd1c	+
10:67157907|67158071	10	67157907	67158071	3	16	0.273	exon	ENSMUSG00000037876	Jmjd1c	+
10:67157907|67158071	10	67157907	67158071	7	19	0.424	exon	ENSMUSG00000037876	Jmjd1c	+
10:67157907|67158071	10	67157907	67158071	9	36	0.333	exon	ENSMUSG00000037876	Jmjd1c	+
10:67157907|67164222	10	67157907	67164222	2	4	0.5	intron	ENSMUSG00000037876	Jmjd1c	+
10:67157907|67189849	10	67157907	67189849	100	10	0.952	exon	ENSMUSG00000037876	Jmjd1c	+
10:67157907|67189849	10	67157907	67189849	102	19	0.915	exon	ENSMUSG00000037876	Jmjd1c	+
10:67157907|67189849	10	67157907	67189849	105	26	0.89	exon	ENSMUSG00000037876	Jmjd1c	+
10:67157907|67189849	10	67157907	67189849	106	8	0.964	exon	ENSMUSG00000037876	Jmjd1c	+
10:67157907|67189849	10	67157907	67189849	109	14	0.94	exon	ENSMUSG00000037876	Jmjd1c	+
10:67157907|67189849	10	67157907	67189849	114	7	0.97	exon	ENSMUSG00000037876	Jmjd1c	+
10:67157907|67189849	10	67157907	67189849	128	12	0.955	exon	ENSMUSG00000037876	Jmjd1c	+
10:67157907|67189849	10	67157907	67189849	142	12	0.959	exon	ENSMUSG00000037876	Jmjd1c	+
10:67157907|67189849	10	67157907	67189849	147	21	0.933	exon	ENSMUSG00000037876	Jmjd1c	+
10:67157907|67189849	10	67157907	67189849	76	9	0.944	exon	ENSMUSG00000037876	Jmjd1c	+
10:67157907|67189849	10	67157907	67189849	88	16	0.917	exon	ENSMUSG00000037876	Jmjd1c	+
10:67157907|67189849	10	67157907	67189849	98	20	0.907	exon	ENSMUSG00000037876	Jmjd1c	+
10:67157907|67215375	10	67157907	67215375	11	4	0.846	exon	ENSMUSG00000037876	Jmjd1c	+
10:67157907|67215375	10	67157907	67215375	5	12	0.455	exon	ENSMUSG00000037876	Jmjd1c	+
10:67157907|67215375	10	67157907	67215375	5	5	0.667	exon	ENSMUSG00000037876	Jmjd1c	+
10:67157907|67215375	10	67157907	67215375	8	13	0.552	exon	ENSMUSG00000037876	Jmjd1c	+
10:67243772|67248150	10	67243772	67248150	3	8	0.429	exon	ENSMUSG00000037876	Jmjd1c	+
10:67245506|67254583	10	67245506	67254583	2	16	0.2	exon	ENSMUSG00000037876	Jmjd1c	+
10:67249630|67254583	10	67249630	67254583	4	17	0.32	exon	ENSMUSG00000037876	Jmjd1c	+
10:68118251|68128993	10	68118251	68128993	13	30	0.464	exon	ENSMUSG00000019947	Arid5b	-
10:68118251|68128993	10	68118251	68128993	2	19	0.174	exon	ENSMUSG00000019947	Arid5b	-
10:68118251|68128993	10	68118251	68128993	4	49	0.14	exon	ENSMUSG00000019947	Arid5b	-
10:68118251|68128993	10	68118251	68128993	5	28	0.263	exon	ENSMUSG00000019947	Arid5b	-
10:68118251|68128993	10	68118251	68128993	5	40	0.2	exon	ENSMUSG00000019947	Arid5b	-
10:68118251|68128993	10	68118251	68128993	6	30	0.286	exon	ENSMUSG00000019947	Arid5b	-
10:68118251|68128993	10	68118251	68128993	6	29	0.293	exon	ENSMUSG00000019947	Arid5b	-
10:68118251|68128993	10	68118251	68128993	7	25	0.359	exon	ENSMUSG00000019947	Arid5b	-
10:68118251|68128993	10	68118251	68128993	8	22	0.421	exon	ENSMUSG00000019947	Arid5b	-
10:68118251|68128993	10	68118251	68128993	8	72	0.182	exon	ENSMUSG00000019947	Arid5b	-
10:68118251|68128993	10	68118251	68128993	9	45	0.286	exon	ENSMUSG00000019947	Arid5b	-
10:68118251|68128993	10	68118251	68128993	9	31	0.367	exon	ENSMUSG00000019947	Arid5b	-
10:68118251|68135106	10	68118251	68135106	14	27	0.509	exon	ENSMUSG00000019947	Arid5b	-
10:68118251|68135106	10	68118251	68135106	18	44	0.45	exon	ENSMUSG00000019947	Arid5b	-
10:68118251|68135106	10	68118251	68135106	18	25	0.59	exon	ENSMUSG00000019947	Arid5b	-
10:68118251|68135106	10	68118251	68135106	19	16	0.704	exon	ENSMUSG00000019947	Arid5b	-
10:68118251|68135106	10	68118251	68135106	19	19	0.667	exon	ENSMUSG00000019947	Arid5b	-
10:68118251|68135106	10	68118251	68135106	25	39	0.562	exon	ENSMUSG00000019947	Arid5b	-
10:68118251|68135106	10	68118251	68135106	27	33	0.621	exon	ENSMUSG00000019947	Arid5b	-
10:68118251|68135106	10	68118251	68135106	28	45	0.554	exon	ENSMUSG00000019947	Arid5b	-
10:68118251|68135106	10	68118251	68135106	34	20	0.773	exon	ENSMUSG00000019947	Arid5b	-
10:68118251|68135106	10	68118251	68135106	38	25	0.752	exon	ENSMUSG00000019947	Arid5b	-
10:68118251|68135106	10	68118251	68135106	52	41	0.717	exon	ENSMUSG00000019947	Arid5b	-
10:68118251|68135106	10	68118251	68135106	8	23	0.41	exon	ENSMUSG00000019947	Arid5b	-
10:68118251|68186256	10	68118251	68186256	3	56	0.097	exon	ENSMUSG00000019947	Arid5b	-
10:68118251|68186256	10	68118251	68186256	7	38	0.269	exon	ENSMUSG00000019947	Arid5b	-
10:68118251|68243229	10	68118251	68243229	2	22	0.154	exon	ENSMUSG00000019947	Arid5b	-
10:68126699|68128993	10	68126699	68128993	10	51	0.282	exon	ENSMUSG00000019947	Arid5b	-
10:68126699|68128993	10	68126699	68128993	11	48	0.314	exon	ENSMUSG00000019947	Arid5b	-
10:68126699|68128993	10	68126699	68128993	2	31	0.114	exon	ENSMUSG00000019947	Arid5b	-
10:68126699|68128993	10	68126699	68128993	2	36	0.1	exon	ENSMUSG00000019947	Arid5b	-
10:68126699|68128993	10	68126699	68128993	3	34	0.15	exon	ENSMUSG00000019947	Arid5b	-
10:68126699|68128993	10	68126699	68128993	5	52	0.161	exon	ENSMUSG00000019947	Arid5b	-
10:68126699|68128993	10	68126699	68128993	5	28	0.263	exon	ENSMUSG00000019947	Arid5b	-
10:68126699|68128993	10	68126699	68128993	5	21	0.323	exon	ENSMUSG00000019947	Arid5b	-
10:68126699|68128993	10	68126699	68128993	8	44	0.267	exon	ENSMUSG00000019947	Arid5b	-
10:68126699|68128993	10	68126699	68128993	9	76	0.191	exon	ENSMUSG00000019947	Arid5b	-
10:68126699|68135106	10	68126699	68135106	5	32	0.238	exon	ENSMUSG00000019947	Arid5b	-
10:68126699|68135106	10	68126699	68135106	8	57	0.219	exon	ENSMUSG00000019947	Arid5b	-
10:68126699|68186256	10	68126699	68186256	2	46	0.08	exon	ENSMUSG00000019947	Arid5b	-
10:68165169|68186256	10	68165169	68186256	2	49	0.075	intron	ENSMUSG00000019947	Arid5b	-
10:68186026|68186256	10	68186026	68186256	10	42	0.323	exon	ENSMUSG00000019947	Arid5b	-
10:68186026|68186256	10	68186026	68186256	11	34	0.393	exon	ENSMUSG00000019947	Arid5b	-
10:68186026|68186256	10	68186026	68186256	11	51	0.301	exon	ENSMUSG00000019947	Arid5b	-
10:68186026|68186256	10	68186026	68186256	12	30	0.444	exon	ENSMUSG00000019947	Arid5b	-
10:68186026|68186256	10	68186026	68186256	13	47	0.356	exon	ENSMUSG00000019947	Arid5b	-
10:68186026|68186256	10	68186026	68186256	14	40	0.412	exon	ENSMUSG00000019947	Arid5b	-
10:68186026|68186256	10	68186026	68186256	16	58	0.356	exon	ENSMUSG00000019947	Arid5b	-
10:68186026|68186256	10	68186026	68186256	18	64	0.36	exon	ENSMUSG00000019947	Arid5b	-
10:68186026|68186256	10	68186026	68186256	31	57	0.521	exon	ENSMUSG00000019947	Arid5b	-
10:68186026|68186256	10	68186026	68186256	7	58	0.194	exon	ENSMUSG00000019947	Arid5b	-
10:68186026|68243229	10	68186026	68243229	19	17	0.691	exon	ENSMUSG00000019947	Arid5b	-
10:68186026|68243229	10	68186026	68243229	22	13	0.772	exon	ENSMUSG00000019947	Arid5b	-
10:68186026|68243229	10	68186026	68243229	22	13	0.772	exon	ENSMUSG00000019947	Arid5b	-
10:68186026|68243229	10	68186026	68243229	23	14	0.767	exon	ENSMUSG00000019947	Arid5b	-
10:68186026|68243229	10	68186026	68243229	23	20	0.697	exon	ENSMUSG00000019947	Arid5b	-
10:68186026|68243229	10	68186026	68243229	27	4	0.931	exon	ENSMUSG00000019947	Arid5b	-
10:68186026|68243229	10	68186026	68243229	28	24	0.7	exon	ENSMUSG00000019947	Arid5b	-
10:68186026|68243229	10	68186026	68243229	29	23	0.716	exon	ENSMUSG00000019947	Arid5b	-
10:68186026|68243229	10	68186026	68243229	31	16	0.795	exon	ENSMUSG00000019947	Arid5b	-
10:68186026|68243229	10	68186026	68243229	35	23	0.753	exon	ENSMUSG00000019947	Arid5b	-
10:68186026|68243229	10	68186026	68243229	47	48	0.662	exon	ENSMUSG00000019947	Arid5b	-
10:68186026|68243229	10	68186026	68243229	70	15	0.903	exon	ENSMUSG00000019947	Arid5b	-
10:68740919|68751328	10	68740919	68751328	2	7	0.364	exon	ENSMUSG00000060044	Tmem26	+
10:68740919|68751328	10	68740919	68751328	9	0	1	exon	ENSMUSG00000060044	Tmem26	+
10:68748376|68751328	10	68748376	68751328	15	0	1	exon	ENSMUSG00000060044	Tmem26	+
10:68748376|68751328	10	68748376	68751328	17	2	0.944	exon	ENSMUSG00000060044	Tmem26	+
10:68748376|68751328	10	68748376	68751328	25	4	0.926	exon	ENSMUSG00000060044	Tmem26	+
10:68748376|68751328	10	68748376	68751328	28	4	0.933	exon	ENSMUSG00000060044	Tmem26	+
10:68748376|68751328	10	68748376	68751328	28	8	0.875	exon	ENSMUSG00000060044	Tmem26	+
10:68748376|68751328	10	68748376	68751328	30	3	0.952	exon	ENSMUSG00000060044	Tmem26	+
10:68748376|68751328	10	68748376	68751328	35	1	0.986	exon	ENSMUSG00000060044	Tmem26	+
10:68748376|68751328	10	68748376	68751328	45	2	0.978	exon	ENSMUSG00000060044	Tmem26	+
10:68748376|68751328	10	68748376	68751328	6	3	0.8	exon	ENSMUSG00000060044	Tmem26	+
10:6900570|6920086	10	6900570	6920086	6	0	1	exon	ENSMUSG00000064065	Ipcef1	-
10:69215302|69249728	10	69215302	69249728	10	37	0.351	exon	ENSMUSG00000019944	Rhobtb1	+
10:69215302|69249728	10	69215302	69249728	5	32	0.238	exon	ENSMUSG00000019944	Rhobtb1	+
10:69215302|69249728	10	69215302	69249728	5	10	0.5	exon	ENSMUSG00000019944	Rhobtb1	+
10:69215302|69249728	10	69215302	69249728	7	15	0.483	exon	ENSMUSG00000019944	Rhobtb1	+
10:69248771|69249728	10	69248771	69249728	10	27	0.426	exon	ENSMUSG00000019944	Rhobtb1	+
10:69248771|69249728	10	69248771	69249728	11	16	0.579	exon	ENSMUSG00000019944	Rhobtb1	+
10:69248771|69249728	10	69248771	69249728	12	35	0.407	exon	ENSMUSG00000019944	Rhobtb1	+
10:69248771|69249728	10	69248771	69249728	14	23	0.549	exon	ENSMUSG00000019944	Rhobtb1	+
10:69248771|69249728	10	69248771	69249728	5	21	0.323	exon	ENSMUSG00000019944	Rhobtb1	+
10:69248771|69249728	10	69248771	69249728	6	26	0.316	exon	ENSMUSG00000019944	Rhobtb1	+
10:69248771|69249728	10	69248771	69249728	8	34	0.32	exon	ENSMUSG00000019944	Rhobtb1	+
10:69248771|69249728	10	69248771	69249728	9	31	0.367	exon	ENSMUSG00000019944	Rhobtb1	+
10:6979514|6996576	10	6979514	6996576	3	2	0.75	exon	ENSMUSG00000064065	Ipcef1	-
10:69927695|69932496	10	69927695	69932496	3	20	0.231	exon	ENSMUSG00000069601	Ank3	+
10:69927695|69932496	10	69927695	69932496	7	28	0.333	exon	ENSMUSG00000069601	Ank3	+
10:70142579|70154836	10	70142579	70154836	13	79	0.248	exon	ENSMUSG00000048701	Ccdc6	+
10:70142579|70154836	10	70142579	70154836	24	82	0.369	exon	ENSMUSG00000048701	Ccdc6	+
10:70142579|70154836	10	70142579	70154836	27	51	0.514	exon	ENSMUSG00000048701	Ccdc6	+
10:70142579|70154836	10	70142579	70154836	30	63	0.488	exon	ENSMUSG00000048701	Ccdc6	+
10:70142579|70154836	10	70142579	70154836	30	41	0.594	exon	ENSMUSG00000048701	Ccdc6	+
10:70142579|70154836	10	70142579	70154836	32	46	0.582	exon	ENSMUSG00000048701	Ccdc6	+
10:70142579|70154836	10	70142579	70154836	39	53	0.595	exon	ENSMUSG00000048701	Ccdc6	+
10:70142579|70154836	10	70142579	70154836	39	87	0.473	exon	ENSMUSG00000048701	Ccdc6	+
10:70142579|70154836	10	70142579	70154836	41	71	0.536	exon	ENSMUSG00000048701	Ccdc6	+
10:70142579|70154836	10	70142579	70154836	44	70	0.557	exon	ENSMUSG00000048701	Ccdc6	+
10:70142579|70154836	10	70142579	70154836	45	65	0.581	exon	ENSMUSG00000048701	Ccdc6	+
10:70142579|70154836	10	70142579	70154836	50	82	0.549	exon	ENSMUSG00000048701	Ccdc6	+
10:70142579|70175167	10	70142579	70175167	5	7	0.588	exon	ENSMUSG00000048701	Ccdc6	+
10:70142579|70175167	10	70142579	70175167	8	10	0.615	exon	ENSMUSG00000048701	Ccdc6	+
10:70142579|70175167	10	70142579	70175167	9	10	0.643	exon	ENSMUSG00000048701	Ccdc6	+
10:70154708|70169252	10	70154708	70169252	3	85	0.066	exon	ENSMUSG00000048701	Ccdc6	+
10:70154708|70169252	10	70154708	70169252	3	84	0.067	exon	ENSMUSG00000048701	Ccdc6	+
10:70154708|70169252	10	70154708	70169252	3	82	0.068	exon	ENSMUSG00000048701	Ccdc6	+
10:70154708|70169252	10	70154708	70169252	4	55	0.127	exon	ENSMUSG00000048701	Ccdc6	+
10:70154708|70169252	10	70154708	70169252	5	62	0.139	exon	ENSMUSG00000048701	Ccdc6	+
10:70154708|70169252	10	70154708	70169252	6	108	0.1	exon	ENSMUSG00000048701	Ccdc6	+
10:70154708|70175167	10	70154708	70175167	10	36	0.357	exon	ENSMUSG00000048701	Ccdc6	+
10:70154708|70175167	10	70154708	70175167	10	41	0.328	exon	ENSMUSG00000048701	Ccdc6	+
10:70154708|70175167	10	70154708	70175167	15	19	0.612	exon	ENSMUSG00000048701	Ccdc6	+
10:70154708|70175167	10	70154708	70175167	15	20	0.6	exon	ENSMUSG00000048701	Ccdc6	+
10:70154708|70175167	10	70154708	70175167	16	31	0.508	exon	ENSMUSG00000048701	Ccdc6	+
10:70154708|70175167	10	70154708	70175167	17	22	0.607	exon	ENSMUSG00000048701	Ccdc6	+
10:70154708|70175167	10	70154708	70175167	20	29	0.58	exon	ENSMUSG00000048701	Ccdc6	+
10:70154708|70175167	10	70154708	70175167	28	35	0.615	exon	ENSMUSG00000048701	Ccdc6	+
10:70154708|70175167	10	70154708	70175167	30	23	0.723	exon	ENSMUSG00000048701	Ccdc6	+
10:70154708|70175167	10	70154708	70175167	37	42	0.638	exon	ENSMUSG00000048701	Ccdc6	+
10:70167002|70175167	10	70167002	70175167	10	58	0.256	exon	ENSMUSG00000048701	Ccdc6	+
10:70167002|70175167	10	70167002	70175167	11	82	0.212	exon	ENSMUSG00000048701	Ccdc6	+
10:70167002|70175167	10	70167002	70175167	14	80	0.259	exon	ENSMUSG00000048701	Ccdc6	+
10:70167002|70175167	10	70167002	70175167	15	45	0.4	exon	ENSMUSG00000048701	Ccdc6	+
10:70167002|70175167	10	70167002	70175167	17	61	0.358	exon	ENSMUSG00000048701	Ccdc6	+
10:70167002|70175167	10	70167002	70175167	2	67	0.056	exon	ENSMUSG00000048701	Ccdc6	+
10:70167002|70175167	10	70167002	70175167	24	75	0.39	exon	ENSMUSG00000048701	Ccdc6	+
10:70167002|70175167	10	70167002	70175167	3	53	0.102	exon	ENSMUSG00000048701	Ccdc6	+
10:70167002|70175167	10	70167002	70175167	5	46	0.179	exon	ENSMUSG00000048701	Ccdc6	+
10:70167002|70175167	10	70167002	70175167	7	75	0.157	exon	ENSMUSG00000048701	Ccdc6	+
10:70167002|70175167	10	70167002	70175167	9	67	0.212	exon	ENSMUSG00000048701	Ccdc6	+
10:70167002|70175167	10	70167002	70175167	9	44	0.29	exon	ENSMUSG00000048701	Ccdc6	+
10:71027898|71079236	10	71027898	71079236	2	10	0.286	exon	ENSMUSG00000014329	Bicc1	-
10:71027898|71079236	10	71027898	71079236	4	5	0.615	exon	ENSMUSG00000014329	Bicc1	-
10:71229087|71237031	10	71229087	71237031	3	4	0.6	exon	ENSMUSG00000003923	Tfam	-
10:71229087|71237031	10	71229087	71237031	4	9	0.471	exon	ENSMUSG00000003923	Tfam	-
10:71229087|71237031	10	71229087	71237031	7	9	0.609	exon	ENSMUSG00000003923	Tfam	-
10:71233357|71235613	10	71233357	71235613	4	7	0.533	exon	ENSMUSG00000003923	Tfam	-
10:71234865|71237031	10	71234865	71237031	4	8	0.5	exon	ENSMUSG00000003923	Tfam	-
10:7134522|7154485	10	7134522	7154485	3	30	0.167	exon	ENSMUSG00000015202	Magi1	-
10:71363450|71366105	10	71363450	71366105	2	1	0.8	exon	ENSMUSG00000060733	Ipmk	+
10:71363450|71372880	10	71363450	71372880	3	16	0.273	exon	ENSMUSG00000060733	Ipmk	+
10:71363450|71376786	10	71363450	71376786	15	3	0.909	exon	ENSMUSG00000060733	Ipmk	+
10:71363450|71376786	10	71363450	71376786	3	19	0.24	exon	ENSMUSG00000060733	Ipmk	+
10:71363450|71376786	10	71363450	71376786	7	23	0.378	exon	ENSMUSG00000060733	Ipmk	+
10:71363450|71376786	10	71363450	71376786	8	18	0.471	exon	ENSMUSG00000060733	Ipmk	+
10:7140319|7154485	10	7140319	7154485	10	26	0.435	exon	ENSMUSG00000015202	Magi1	-
10:7140319|7154485	10	7140319	7154485	13	24	0.52	exon	ENSMUSG00000015202	Magi1	-
10:7140319|7154485	10	7140319	7154485	3	9	0.4	exon	ENSMUSG00000015202	Magi1	-
10:7140319|7154485	10	7140319	7154485	4	32	0.2	exon	ENSMUSG00000015202	Magi1	-
10:7140319|7154485	10	7140319	7154485	6	14	0.462	exon	ENSMUSG00000015202	Magi1	-
10:7140319|7154485	10	7140319	7154485	8	9	0.64	exon	ENSMUSG00000015202	Magi1	-
10:7152864|7154485	10	7152864	7154485	25	13	0.794	exon	ENSMUSG00000015202	Magi1	-
10:7152864|7154485	10	7152864	7154485	33	30	0.688	exon	ENSMUSG00000015202	Magi1	-
10:7152864|7154485	10	7152864	7154485	38	9	0.894	exon	ENSMUSG00000015202	Magi1	-
10:7152864|7154485	10	7152864	7154485	39	42	0.65	exon	ENSMUSG00000015202	Magi1	-
10:7152864|7154485	10	7152864	7154485	40	33	0.708	exon	ENSMUSG00000015202	Magi1	-
10:7152864|7154485	10	7152864	7154485	40	17	0.825	exon	ENSMUSG00000015202	Magi1	-
10:7152864|7154485	10	7152864	7154485	44	31	0.739	exon	ENSMUSG00000015202	Magi1	-
10:7152864|7154485	10	7152864	7154485	45	10	0.9	exon	ENSMUSG00000015202	Magi1	-
10:7152864|7154485	10	7152864	7154485	45	21	0.811	exon	ENSMUSG00000015202	Magi1	-
10:7152864|7154485	10	7152864	7154485	51	6	0.944	exon	ENSMUSG00000015202	Magi1	-
10:7152864|7154485	10	7152864	7154485	52	26	0.8	exon	ENSMUSG00000015202	Magi1	-
10:7152864|7154485	10	7152864	7154485	73	20	0.88	exon	ENSMUSG00000015202	Magi1	-
10:7152864|7160807	10	7152864	7160807	12	18	0.571	exon	ENSMUSG00000015202	Magi1	-
10:7152864|7160807	10	7152864	7160807	13	17	0.605	exon	ENSMUSG00000015202	Magi1	-
10:7152864|7160807	10	7152864	7160807	14	12	0.7	exon	ENSMUSG00000015202	Magi1	-
10:7152864|7160807	10	7152864	7160807	16	5	0.865	exon	ENSMUSG00000015202	Magi1	-
10:7152864|7160807	10	7152864	7160807	18	6	0.857	exon	ENSMUSG00000015202	Magi1	-
10:7152864|7160807	10	7152864	7160807	22	4	0.917	exon	ENSMUSG00000015202	Magi1	-
10:7152864|7160807	10	7152864	7160807	22	4	0.917	exon	ENSMUSG00000015202	Magi1	-
10:7152864|7160807	10	7152864	7160807	24	18	0.727	exon	ENSMUSG00000015202	Magi1	-
10:7152864|7160807	10	7152864	7160807	26	18	0.743	exon	ENSMUSG00000015202	Magi1	-
10:7152864|7160807	10	7152864	7160807	31	4	0.939	exon	ENSMUSG00000015202	Magi1	-
10:7152864|7160807	10	7152864	7160807	37	9	0.892	exon	ENSMUSG00000015202	Magi1	-
10:7152864|7160807	10	7152864	7160807	38	22	0.776	exon	ENSMUSG00000015202	Magi1	-
10:75131021|75131684	10	75131021	75131684	13	10	0.722	exon	ENSMUSG00000009681	Bcr	+
10:75131021|75131684	10	75131021	75131684	2	5	0.444	exon	ENSMUSG00000009681	Bcr	+
10:75131021|75131684	10	75131021	75131684	7	11	0.56	exon	ENSMUSG00000009681	Bcr	+
10:75131021|75136001	10	75131021	75136001	2	8	0.333	exon	ENSMUSG00000009681	Bcr	+
10:75274017|75279961	10	75274017	75279961	23	13	0.78	exon	ENSMUSG00000033444	Specc1l	+
10:75274017|75279961	10	75274017	75279961	31	15	0.805	exon	ENSMUSG00000033444	Specc1l	+
10:75274017|75279961	10	75274017	75279961	32	15	0.81	exon	ENSMUSG00000033444	Specc1l	+
10:75274017|75279961	10	75274017	75279961	32	6	0.914	exon	ENSMUSG00000033444	Specc1l	+
10:75274017|75279961	10	75274017	75279961	39	18	0.812	exon	ENSMUSG00000033444	Specc1l	+
10:75274017|75279961	10	75274017	75279961	40	24	0.769	exon	ENSMUSG00000033444	Specc1l	+
10:75274017|75279961	10	75274017	75279961	46	12	0.885	exon	ENSMUSG00000033444	Specc1l	+
10:75274017|75279961	10	75274017	75279961	52	8	0.929	exon	ENSMUSG00000033444	Specc1l	+
10:75274017|75279961	10	75274017	75279961	53	16	0.869	exon	ENSMUSG00000033444	Specc1l	+
10:75274017|75279961	10	75274017	75279961	56	2	0.982	exon	ENSMUSG00000033444	Specc1l	+
10:75274017|75279961	10	75274017	75279961	64	12	0.914	exon	ENSMUSG00000033444	Specc1l	+
10:75274017|75279961	10	75274017	75279961	75	27	0.847	exon	ENSMUSG00000033444	Specc1l	+
10:75276771|75279961	10	75276771	75279961	4	18	0.308	exon	ENSMUSG00000033444	Specc1l	+
10:75276771|75279961	10	75276771	75279961	4	32	0.2	exon	ENSMUSG00000033444	Specc1l	+
10:75276771|75279961	10	75276771	75279961	4	31	0.205	exon	ENSMUSG00000033444	Specc1l	+
10:75276771|75279961	10	75276771	75279961	7	37	0.275	exon	ENSMUSG00000033444	Specc1l	+
10:75428181|75430131	10	75428181	75430131	3	381	0.016	exon	ENSMUSG00000033427	Upb1	+
10:75428181|75438211	10	75428181	75438211	3	195	0.03	exon	ENSMUSG00000033427	Upb1	+
10:75684292|75695046	10	75684292	75695046	4	68	0.105	exon	ENSMUSG00000020196	Cabin1	-
10:75684292|75700095	10	75684292	75700095	19	3	0.927	exon	ENSMUSG00000020196	Cabin1	-
10:75684292|75700095	10	75684292	75700095	24	7	0.873	exon	ENSMUSG00000020196	Cabin1	-
10:75684292|75700095	10	75684292	75700095	27	4	0.931	exon	ENSMUSG00000020196	Cabin1	-
10:75684292|75700095	10	75684292	75700095	28	1	0.982	exon	ENSMUSG00000020196	Cabin1	-
10:75684292|75700095	10	75684292	75700095	29	1	0.983	exon	ENSMUSG00000020196	Cabin1	-
10:75684292|75700095	10	75684292	75700095	30	3	0.952	exon	ENSMUSG00000020196	Cabin1	-
10:75684292|75700095	10	75684292	75700095	38	2	0.974	exon	ENSMUSG00000020196	Cabin1	-
10:75684292|75700095	10	75684292	75700095	42	3	0.966	exon	ENSMUSG00000020196	Cabin1	-
10:75684292|75700095	10	75684292	75700095	46	1	0.989	exon	ENSMUSG00000020196	Cabin1	-
10:75684292|75700095	10	75684292	75700095	49	4	0.961	exon	ENSMUSG00000020196	Cabin1	-
10:75684292|75700095	10	75684292	75700095	53	14	0.883	exon	ENSMUSG00000020196	Cabin1	-
10:75684292|75700095	10	75684292	75700095	57	3	0.974	exon	ENSMUSG00000020196	Cabin1	-
10:75694715|75700095	10	75694715	75700095	11	24	0.478	exon	ENSMUSG00000020196	Cabin1	-
10:75694715|75700095	10	75694715	75700095	15	11	0.732	exon	ENSMUSG00000020196	Cabin1	-
10:75694715|75700095	10	75694715	75700095	19	7	0.844	exon	ENSMUSG00000020196	Cabin1	-
10:75694715|75700095	10	75694715	75700095	4	22	0.267	exon	ENSMUSG00000020196	Cabin1	-
10:75694715|75700095	10	75694715	75700095	6	6	0.667	exon	ENSMUSG00000020196	Cabin1	-
10:75694715|75700095	10	75694715	75700095	6	19	0.387	exon	ENSMUSG00000020196	Cabin1	-
10:75694715|75700095	10	75694715	75700095	6	11	0.522	exon	ENSMUSG00000020196	Cabin1	-
10:75694715|75700095	10	75694715	75700095	7	13	0.519	exon	ENSMUSG00000020196	Cabin1	-
10:75694715|75700095	10	75694715	75700095	7	27	0.341	exon	ENSMUSG00000020196	Cabin1	-
10:75694715|75700095	10	75694715	75700095	7	20	0.412	exon	ENSMUSG00000020196	Cabin1	-
10:75694715|75700095	10	75694715	75700095	9	19	0.486	exon	ENSMUSG00000020196	Cabin1	-
10:75717438|75721539	10	75717438	75721539	4	2	0.8	exon	ENSMUSG00000020196	Cabin1	-
10:75904384|75911656	10	75904384	75911656	2	12	0.25	exon	ENSMUSG00000000902	Smarcb1	-
10:75904384|75911656	10	75904384	75911656	3	3	0.667	exon	ENSMUSG00000000902	Smarcb1	-
10:75910154|75916911	10	75910154	75916911	5	27	0.27	exon	ENSMUSG00000000902	Smarcb1	-
10:75915064|75916911	10	75915064	75916911	2	18	0.182	exon	ENSMUSG00000000902	Smarcb1	-
10:75915064|75916911	10	75915064	75916911	6	19	0.387	exon	ENSMUSG00000000902	Smarcb1	-
10:75915064|75916911	10	75915064	75916911	7	15	0.483	exon	ENSMUSG00000000902	Smarcb1	-
10:76217314|76221162	10	76217314	76221162	6	0	1	exon	ENSMUSG00000020230	Prmt2	-
10:76225288|76226315	10	76225288	76226315	10	2	0.909	exon	ENSMUSG00000020230	Prmt2	-
10:76225288|76226315	10	76225288	76226315	5	2	0.833	exon	ENSMUSG00000020230	Prmt2	-
10:76367308|76370079	10	76367308	76370079	3	3	0.667	exon	ENSMUSG00000001151	Pcnt	-
10:76367308|76370079	10	76367308	76370079	3	0	1	exon	ENSMUSG00000001151	Pcnt	-
10:76367308|76370079	10	76367308	76370079	4	3	0.727	exon	ENSMUSG00000001151	Pcnt	-
10:76367308|76370079	10	76367308	76370079	5	5	0.667	exon	ENSMUSG00000001151	Pcnt	-
10:76367308|76370079	10	76367308	76370079	5	3	0.769	exon	ENSMUSG00000001151	Pcnt	-
10:76367308|76370079	10	76367308	76370079	8	6	0.727	exon	ENSMUSG00000001151	Pcnt	-
10:76399856|76401535	10	76399856	76401535	3	5	0.545	exon	ENSMUSG00000001151	Pcnt	-
10:7640045|7640815	10	7640045	7640815	4	26	0.235	exon	ENSMUSG00000019795	Pcmt1	-
10:7640045|7640815	10	7640045	7640815	5	38	0.208	exon	ENSMUSG00000019795	Pcmt1	-
10:7640045|7640815	10	7640045	7640815	8	16	0.5	exon	ENSMUSG00000019795	Pcmt1	-
10:7640045|7640815	10	7640045	7640815	9	23	0.439	exon	ENSMUSG00000019795	Pcmt1	-
10:7640045|7640815	10	7640045	7640815	9	10	0.643	exon	ENSMUSG00000019795	Pcmt1	-
10:7640045|7644429	10	7640045	7644429	4	9	0.471	exon	ENSMUSG00000019795	Pcmt1	-
10:7640045|7644429	10	7640045	7644429	8	11	0.593	exon	ENSMUSG00000019795	Pcmt1	-
10:7640045|7644429	10	7640045	7644429	9	9	0.667	exon	ENSMUSG00000019795	Pcmt1	-
10:7640045|7649155	10	7640045	7649155	12	21	0.533	exon	ENSMUSG00000019795	Pcmt1	-
10:7640045|7649155	10	7640045	7649155	12	28	0.462	exon	ENSMUSG00000019795	Pcmt1	-
10:7640045|7649155	10	7640045	7649155	13	30	0.464	exon	ENSMUSG00000019795	Pcmt1	-
10:7640045|7649155	10	7640045	7649155	16	16	0.667	exon	ENSMUSG00000019795	Pcmt1	-
10:7640045|7649155	10	7640045	7649155	18	14	0.72	exon	ENSMUSG00000019795	Pcmt1	-
10:7640045|7649155	10	7640045	7649155	20	22	0.645	exon	ENSMUSG00000019795	Pcmt1	-
10:7640045|7649155	10	7640045	7649155	5	1	0.909	exon	ENSMUSG00000019795	Pcmt1	-
10:7640045|7649155	10	7640045	7649155	7	7	0.667	exon	ENSMUSG00000019795	Pcmt1	-
10:7644325|7649155	10	7644325	7649155	10	53	0.274	exon	ENSMUSG00000019795	Pcmt1	-
10:7644325|7649155	10	7644325	7649155	11	27	0.449	exon	ENSMUSG00000019795	Pcmt1	-
10:7644325|7649155	10	7644325	7649155	5	46	0.179	exon	ENSMUSG00000019795	Pcmt1	-
10:7644325|7649155	10	7644325	7649155	8	19	0.457	exon	ENSMUSG00000019795	Pcmt1	-
10:7644325|7649155	10	7644325	7649155	8	29	0.356	exon	ENSMUSG00000019795	Pcmt1	-
10:7644325|7649155	10	7644325	7649155	9	26	0.409	exon	ENSMUSG00000019795	Pcmt1	-
10:7647590|7649155	10	7647590	7649155	2	21	0.16	exon	ENSMUSG00000019795	Pcmt1	-
10:7647590|7649155	10	7647590	7649155	2	56	0.067	exon	ENSMUSG00000019795	Pcmt1	-
10:7647590|7649155	10	7647590	7649155	3	14	0.3	exon	ENSMUSG00000019795	Pcmt1	-
10:7647590|7649155	10	7647590	7649155	4	28	0.222	exon	ENSMUSG00000019795	Pcmt1	-
10:7647590|7649155	10	7647590	7649155	5	11	0.476	exon	ENSMUSG00000019795	Pcmt1	-
10:7647590|7649155	10	7647590	7649155	5	24	0.294	exon	ENSMUSG00000019795	Pcmt1	-
10:76511020|76512568	10	76511020	76512568	10	1	0.952	exon	ENSMUSG00000001150	Mcm3ap	+
10:76511020|76512568	10	76511020	76512568	3	2	0.75	exon	ENSMUSG00000001150	Mcm3ap	+
10:76511020|76512568	10	76511020	76512568	3	8	0.429	exon	ENSMUSG00000001150	Mcm3ap	+
10:76511020|76512568	10	76511020	76512568	5	9	0.526	exon	ENSMUSG00000001150	Mcm3ap	+
10:76511020|76512568	10	76511020	76512568	7	0	1	exon	ENSMUSG00000001150	Mcm3ap	+
10:76511020|76512568	10	76511020	76512568	9	0	1	exon	ENSMUSG00000001150	Mcm3ap	+
10:7669553|7673720	10	7669553	7673720	4	6	0.571	exon	ENSMUSG00000040034	Nup43	+
10:7669553|7673720	10	7669553	7673720	6	2	0.857	exon	ENSMUSG00000040034	Nup43	+
10:7669553|7673720	10	7669553	7673720	7	2	0.875	exon	ENSMUSG00000040034	Nup43	+
10:7669553|7676362	10	7669553	7676362	16	0	1	exon	ENSMUSG00000040034	Nup43	+
10:7669553|7676362	10	7669553	7676362	5	1	0.909	exon	ENSMUSG00000040034	Nup43	+
10:7669553|7676362	10	7669553	7676362	7	1	0.933	exon	ENSMUSG00000040034	Nup43	+
10:76797795|76800914	10	76797795	76800914	5	3	0.769	exon	ENSMUSG00000001120	Pcbp3	-
10:76797795|76800914	10	76797795	76800914	6	7	0.632	exon	ENSMUSG00000001120	Pcbp3	-
10:7701610|7703120	10	7701610	7703120	3	0	1	exon	ENSMUSG00000040021	Lats1	+
10:7701610|7703120	10	7701610	7703120	7	14	0.5	exon	ENSMUSG00000040021	Lats1	+
10:7705460|7710647	10	7705460	7710647	2	7	0.364	exon	ENSMUSG00000040021	Lats1	+
10:77085267|77096535	10	77085267	77096535	3	547	0.011	exon	ENSMUSG00000001435	Col18a1	-
10:77085267|77096535	10	77085267	77096535	5	677	0.015	exon	ENSMUSG00000001435	Col18a1	-
10:77303173|77317350	10	77303173	77317350	7	9	0.609	exon	ENSMUSG00000020262	Adarb1	-
10:7738723|7743736	10	7738723	7743736	2	3	0.571	exon	ENSMUSG00000019794	Katna1	+
10:7738723|7743736	10	7738723	7743736	3	3	0.667	exon	ENSMUSG00000019794	Katna1	+
10:7738723|7743736	10	7738723	7743736	3	6	0.5	exon	ENSMUSG00000019794	Katna1	+
10:7738723|7743736	10	7738723	7743736	6	1	0.923	exon	ENSMUSG00000019794	Katna1	+
10:77497363|77514414	10	77497363	77514414	2	98	0.039	exon	ENSMUSG00000032977	Fam207a	-
10:77497363|77514414	10	77497363	77514414	4	59	0.119	exon	ENSMUSG00000032977	Fam207a	-
10:77630726|77630894	10	77630726	77630894	178	83	0.811	exon	ENSMUSG00000009293;ENSMUSG00000112241	Ube2g2;Sumo3	+
10:77630726|77630894	10	77630726	77630894	196	105	0.789	exon	ENSMUSG00000112241;ENSMUSG00000009293	Sumo3;Ube2g2	+
10:77630726|77630894	10	77630726	77630894	233	97	0.828	exon	ENSMUSG00000112241;ENSMUSG00000009293	Sumo3;Ube2g2	+
10:77630726|77630894	10	77630726	77630894	246	97	0.835	exon	ENSMUSG00000112241;ENSMUSG00000009293	Sumo3;Ube2g2	+
10:77630726|77630894	10	77630726	77630894	248	94	0.841	exon	ENSMUSG00000009293;ENSMUSG00000112241	Ube2g2;Sumo3	+
10:77630726|77630894	10	77630726	77630894	256	73	0.875	exon	ENSMUSG00000112241;ENSMUSG00000009293	Sumo3;Ube2g2	+
10:77630726|77630894	10	77630726	77630894	292	117	0.833	exon	ENSMUSG00000112241;ENSMUSG00000009293	Sumo3;Ube2g2	+
10:77630726|77630894	10	77630726	77630894	293	115	0.836	exon	ENSMUSG00000112241;ENSMUSG00000009293	Sumo3;Ube2g2	+
10:77630726|77630894	10	77630726	77630894	299	69	0.897	exon	ENSMUSG00000112241;ENSMUSG00000009293	Sumo3;Ube2g2	+
10:77630726|77630894	10	77630726	77630894	312	106	0.855	exon	ENSMUSG00000112241;ENSMUSG00000009293	Sumo3;Ube2g2	+
10:77630726|77630894	10	77630726	77630894	320	152	0.808	exon	ENSMUSG00000112241;ENSMUSG00000009293	Sumo3;Ube2g2	+
10:77630726|77630894	10	77630726	77630894	360	101	0.877	exon	ENSMUSG00000112241;ENSMUSG00000009293	Sumo3;Ube2g2	+
10:7795644|7795861	10	7795644	7795861	2	19	0.174	exon	ENSMUSG00000015757	Ppil4	+
10:7795644|7795861	10	7795644	7795861	6	19	0.387	exon	ENSMUSG00000015757	Ppil4	+
10:7799553|7805022	10	7799553	7805022	2	8	0.333	exon	ENSMUSG00000015757	Ppil4	+
10:77997524|77999934	10	77997524	77999934	2	13	0.235	exon	ENSMUSG00000020277	Pfkl	-
10:7804956|7814811	10	7804956	7814811	3	8	0.429	exon	ENSMUSG00000015757	Ppil4	+
10:7804956|7814811	10	7804956	7814811	3	4	0.6	exon	ENSMUSG00000015757	Ppil4	+
10:7810362|7814811	10	7810362	7814811	3	7	0.462	exon	ENSMUSG00000015757	Ppil4	+
10:7810362|7814811	10	7810362	7814811	5	10	0.5	exon	ENSMUSG00000015757	Ppil4	+
10:7810362|7814811	10	7810362	7814811	5	37	0.213	exon	ENSMUSG00000015757	Ppil4	+
10:78202880|78204392	10	78202880	78204392	2	36	0.1	exon	ENSMUSG00000000374	Trappc10	-
10:78228779|78231535	10	78228779	78231535	2	10	0.286	exon	ENSMUSG00000000374	Trappc10	-
10:78228779|78231535	10	78228779	78231535	3	34	0.15	exon	ENSMUSG00000000374	Trappc10	-
10:7924685|7933208	10	7924685	7933208	2	7	0.364	exon	ENSMUSG00000015755	Tab2	-
10:7924685|7933208	10	7924685	7933208	3	2	0.75	exon	ENSMUSG00000015755	Tab2	-
10:79859781|79859955	10	79859781	79859955	11	31	0.415	exon	ENSMUSG00000006498	Ptbp1	+
10:79859781|79859955	10	79859781	79859955	3	36	0.143	exon	ENSMUSG00000006498	Ptbp1	+
10:79859781|79859955	10	79859781	79859955	3	14	0.3	exon	ENSMUSG00000006498	Ptbp1	+
10:79859781|79859955	10	79859781	79859955	6	14	0.462	exon	ENSMUSG00000006498	Ptbp1	+
10:79859781|79859955	10	79859781	79859955	8	23	0.41	exon	ENSMUSG00000006498	Ptbp1	+
10:79930635|79932078	10	79930635	79932078	2	2	0.667	exon	ENSMUSG00000019564	Arid3a	+
10:79930635|79932078	10	79930635	79932078	3	2	0.75	exon	ENSMUSG00000019564	Arid3a	+
10:80000712|80001090	10	80000712	80001090	13	13	0.667	exon	ENSMUSG00000035722	Abca7	+
10:80000712|80001090	10	80000712	80001090	2	1	0.8	exon	ENSMUSG00000035722	Abca7	+
10:80000712|80001090	10	80000712	80001090	2	8	0.333	exon	ENSMUSG00000035722	Abca7	+
10:80000712|80001090	10	80000712	80001090	6	4	0.75	exon	ENSMUSG00000035722	Abca7	+
10:80000712|80001090	10	80000712	80001090	6	2	0.857	exon	ENSMUSG00000035722	Abca7	+
10:80069282|80070051	10	80069282	80070051	11	20	0.524	exon	ENSMUSG00000035673	Sbno2	-
10:80069282|80070051	10	80069282	80070051	11	11	0.667	exon	ENSMUSG00000035673	Sbno2	-
10:80069282|80070051	10	80069282	80070051	3	14	0.3	exon	ENSMUSG00000035673	Sbno2	-
10:80069282|80070051	10	80069282	80070051	5	13	0.435	exon	ENSMUSG00000035673	Sbno2	-
10:80069282|80070051	10	80069282	80070051	5	16	0.385	exon	ENSMUSG00000035673	Sbno2	-
10:80082615|80086432	10	80082615	80086432	7	14	0.5	exon	ENSMUSG00000035673	Sbno2	-
10:80082615|80086432	10	80082615	80086432	8	13	0.552	exon	ENSMUSG00000035673	Sbno2	-
10:80228322|80230127	10	80228322	80230127	4	5	0.615	exon	ENSMUSG00000020156	Mum1	+
10:80333503|80334134	10	80333503	80334134	2	165	0.024	exon	ENSMUSG00000035504	Reep6	+
10:80333503|80334134	10	80333503	80334134	2	129	0.03	exon	ENSMUSG00000035504	Reep6	+
10:80671559|80672015	10	80671559	80672015	3	127	0.045	exon	ENSMUSG00000020190	Mknk2	-
10:80712112|80712930	10	80712112	80712930	3	90	0.062	exon	ENSMUSG00000020198	Ap3d1	-
10:80712112|80715179	10	80712112	80715179	15	43	0.411	exon	ENSMUSG00000020198	Ap3d1	-
10:80712112|80715179	10	80712112	80715179	26	46	0.531	exon	ENSMUSG00000020198	Ap3d1	-
10:80712112|80715179	10	80712112	80715179	27	52	0.509	exon	ENSMUSG00000020198	Ap3d1	-
10:80712112|80715179	10	80712112	80715179	29	30	0.659	exon	ENSMUSG00000020198	Ap3d1	-
10:80712112|80715179	10	80712112	80715179	35	49	0.588	exon	ENSMUSG00000020198	Ap3d1	-
10:80712112|80715179	10	80712112	80715179	40	89	0.473	exon	ENSMUSG00000020198	Ap3d1	-
10:80712112|80715179	10	80712112	80715179	47	85	0.525	exon	ENSMUSG00000020198	Ap3d1	-
10:80712112|80715179	10	80712112	80715179	49	39	0.715	exon	ENSMUSG00000020198	Ap3d1	-
10:80712112|80715179	10	80712112	80715179	53	50	0.679	exon	ENSMUSG00000020198	Ap3d1	-
10:80712112|80715179	10	80712112	80715179	53	40	0.726	exon	ENSMUSG00000020198	Ap3d1	-
10:80712112|80715179	10	80712112	80715179	56	81	0.58	exon	ENSMUSG00000020198	Ap3d1	-
10:80712112|80715179	10	80712112	80715179	60	66	0.645	exon	ENSMUSG00000020198	Ap3d1	-
10:80712112|80719812	10	80712112	80719812	5	62	0.139	exon	ENSMUSG00000020198	Ap3d1	-
10:80712112|80719812	10	80712112	80719812	6	99	0.108	exon	ENSMUSG00000020198	Ap3d1	-
10:80712112|80719812	10	80712112	80719812	7	46	0.233	exon	ENSMUSG00000020198	Ap3d1	-
[truncated: 57,480 more rows]
